# Supplementary material for: The Primary Transcriptome of Salmonella enterica Serovar Typhimurium and Its Dependence on ppGpp during Late Stationary Phase
Source: PLoS One. 2014 Mar 24;9(3):e92690. doi: 10.1371/journal.pone.0092690 (PMC3963941; doi:10.1371/journal.pone.0092690)
Supplement: Table S7 — ESP TSSs with no corresponding LSP TSS or alternative TSS. (XLSX) [file pone.0092690.s013.xlsx]

## Sheet: Table S7
Table S7: ESP TSSs not identified at LSP
No	Genome	TSS	TSS Type	Strand	SL1344_ID	LT2_ID	Start position	End position	Operon	Gene Name	Gene Description	Functional Category	Promoter Sequence (-50 --> +1) 5' ----> 3'
1	Chr	5909	P	-	SL1344_0005	STM0005	5114	5887		yaaA	hypothetical protein	Putative or unknown function	AATCGCAACCATCGGTCAACTCTGCGGCGTTTTTTTGCTAAAGTCGCAGAA
2	Chr	9950	P	-	SL1344_0009	STM0009	9376	9942		yaaH	hypothetical protein	Putative or unknown function	GGAACTCGTTATTCTGGGAAACTATTTCACCATTCAATTATGATGATTTTG
3	Chr	11322	P	-	SL1344_0011	STM0011	10841	11245	SL1344_0011-0010	yaaI	hypothetical protein	Putative or unknown function	AAATTAAATAACGAATACCATTCACAGAAAAATTGTAATAAAAAGAAAAGA
4	Chr	16230	I	+	SL1344_0015	STM0015	16088	16432		No Data	bacteriophage protein	Transposon functions/phage	CTTTGTCAGCTATCTTTTACGCAAAGATAAGACAGAATATAATAGTTCTCA
5	Chr	23064	P	+	SL1344_0020	STM0020	23335	24039	SL1344_0020-0028	No Data	cytoplasmic protein	Putative or unknown function	AAATGGTAGAGTATTATGCTGCCCCTCGCTATTTCAGATAATATAACTGCT
6	Chr	44202	P	+	SL1344_0039	STM0038	44312	46027		No Data	possible sulfatase	Putative or unknown function	CCTAAAATTTGAATATAACGCTTCACGTAACTGAATTGCTAAAATAAAAAG
7	Chr	52849	P	+	SL1344_0046	STM0045	52872	53810		ribF	bifunctional riboflavin kinase/FMN adenylyltransferase	Vitamins and Cofactors	CAGGGCAATCGCCGGTTAACCTTAACCGCTGTACAAGGTATACTCTTGCGA
8	Chr	53691	P	+	SL1344_0047	STM0046	53855	56689		ileS	isoleucyl-tRNA synthetase	Translation/protein modification	TGCATCTGCTGGACGTTGTAATGGACCTCTACGGTCGCCATATAGATGTAA
9	Chr	80468	P	+	SL1344_0069	STM0068	80551	80946		caiF	transcriptional activator CaiF	Regulators	AGCACGATATTGCTCACACTAATCAATATTTAAGTCGCATACTATCTTGCA
10	Chr	95965	P	+	SL1344_0084	STM0084	96052	97851		No Data	putative sulfatase	Putative or unknown function	GTAATAAATGAATATGTGATAAAGTTACTGACTACAGGTATAATAATATGA
11	Chr	98232	P	+	SL1344_0086	STM0085	98258	98788		yabF	putative NAD (P)H oxidoreductase	Putative or unknown function	TCAATAATATTCACTATTAGCCTGGCGAATTTGTCACTACACTTTGTAATA
12	Chr	100815	P	+	SL1344_0088	STM0087	100842	101321		folA	dihydrofolate reductase	Vitamins and Cofactors	TCCTCTTTTCGTCAGTCGACGAAAGATTGCGCTTTACGTATAGTGGCGGCA
13	Chr	115459	P	-	SL1344_0098	STM0097	113085	115436		polB	DNA polymerase II	DNA/RNA replication, recombination, and repair	CCTGTACAAAATAACAGTATTACCCCCTAAAACAGGTTATAATTAGCGTGA
14	Chr	128546	P	-	SL1344_0109	STM0109	126851	128509		yabN	putative ABC transporter periplasmic solute binding protein	Putative or unknown function	CCTCTTCCTCTTGCTTCATCGAAAGATATTATTGGCCTAATATAGGGATAA
15	Chr	141352	I	+	SL1344_0121	STM0121	141348	141713		ftsL	cell division protein FtsL	Cell division	CTCGGGCCCGTAGTTCAGTTCTGCGTATCGCAGAGAGGACGAACGCATGAT
16	Chr	156912	P	+	SL1344_0134	STM0134	156938	157855		lpxC	UDP-3-O-[3-hydroxymyristoyl] N-acetylglucosamine deacetylase	Polysaccharide and LPS metabolism	GGGCTCTTTGTGCTAAACTGGCCCGCCGAATGTATAGTACACTTCGGTTGG
17	Chr	190157	P	+	SL1344_0162	STM0161	190196	191149	SL1344_0162-0164	kdgT	2-keto-3-deoxygluconate permease	Transport and binding proteins	CTGTGATCTGACGCGTTTGTGATCTTAATTTGATTGAATATAATCGTTATG
18	Chr	209257	P	+	SL1344_0179	STM0178	209289	209729		yadI	putative PTS system IIA component	Putative or unknown function	AAATGATCGTGGTCATAGTGTGTTGTCGGCCAAAAAAACATGCTGACATCA
19	Chr	212528	S, I	-	SL1344_0182	STM0181	211502	212356		panC	pantoate--beta-alanine ligase	Vitamins and Cofactors	CCTCGCCGAAGCGGGCGACATGCGCGCCGCCGTACAGCAGTATATGGCTGA
20	Chr	213301	P	-	SL1344_0183	STM0182	212482	213273		panB	3-methyl-2-oxobutanoate hydroxymethyltransferase	Vitamins and Cofactors	GATTGCTTAAATCAATTGCCCCCCTGAATATGACTGTTAGAATGCCGGGAA
21	Chr	215632	I	-	SL1344_0185	STM0183	213870	215288	SL1344_0185-0184	folK	2-amino-4-hydroxy-6-hydroxymethyldihyropteridine pyrophosphokinase	Vitamins and Cofactors	ACGTGCACCTTCCGCTGGCGCTCAACGAACAAGGCGCTAAACTTTCCAAGC
22	Chr	217132	P, I	-	SL1344_0187	STM0186	216394	216849		dksA	dosage-dependent dnaK suppressor protein	Regulators	CGCCATTACACGTTTTTCCCCCGCACGTCATATCGATATAAAATACGCGCA
23	Chr	247756	S	-	SL1344_0212	STM0211	247314	247700		yaeH	conserved hypothetical protein	Putative or unknown function	CGAGACGTCTTCTGCGATCAACCGCGCTTTTTTTGTATACACTGGTGGCGA
24	Chr	250136	P	-	SL1344_0214	STM0213	249285	250109		dapD	2,3,4,5-tetrahydropyridine-2-carboxylate N-succinyltransferase	Amino acid/polyamine metabolism	GTGCAACAACGGTTGACAGCGGCCCTCAATCCAAACGATAAAGGGTAGTGT
25	Chr	256040	P, I	+	SL1344_0219	STM0218	256272	256997		pyrH	Uridylate kinase	Purine/pyrimidine metabolism	AGCAAATCTGTTGGCCAACTGCTGAAAGAGCACAACGCTGACGTGACTGGC
26	Chr	262510	I	+	SL1344_0225	STM0224	262510	264789	SL1344_0225-0227	yaeT	outer membrane protein assembly factor YaeT	Cell surface/envelope	TTCATTTCGAAGGCCTGCAGCGAGTCGCCGTTGGTGCGGCTCTCCTCAGTA
27	Chr	266503	P	+	SL1344_0228	STM0227	266531	266987	SL1344_0228-0232	fabZ	(3R)-hydroxymyristol acyl carrier protein dehydrase	Fatty acid/lipid metabolism	TTCCGGCCTGTCACATTCATACGATTGCGGCAGGCCGTGTTATTATTGCCT
28	Chr	272830	P, I	+	SL1344_0233	STM0233	273038	273998		accA	acetyl-coenzyme A carboxylase carboxyl transferase subunit alpha	Polysaccharide and LPS metabolism	ATACGCTCGCGGGCTTGCTATCTCGCTGACGGACAGGCAAATTGATGACCA
29	Chr	278642	P	+	SL1344_0237	STM0236	278747	279958		mesJ	cell cycle protein MesJ	Cell division	TATGAGCAGTAAGGCTTGTCATTAAGACGCTCGCCAGGTAACGTTGCCGGG
30	Chr	280665	P	+	SL1344_0240	STM0239	280687	281232	SL1344_0240-0241	yaeQ	conserved hypothetical protein	Putative or unknown function	TAAAAGATTCGTTAACAGCCTTTTAGCGCGGTTTTCGCTACAATGGGCGCC
31	Chr	288026	I	-	SL1344_0248	STM0247	287014	288045	SL1344_0248-0246	abc	putative ABC transporter ATP-binding protein	Putative or unknown function	CCGCTCATTTCATTACGATAATAAAGAATCAATGATTAAACTTTCGAATAT
32	Chr	295025	P	+	SL1344_0250	STM0255	295060	295863		yafB	hypothetical oxidoreductase	Putative or unknown function	CTGCATTTCTCGCTCTTTTTCTGCAAAGCGCTGAAGGTCATAATCCCCTCA
33	Chr	296841	P	-	SL1344_0251	STM0256	295884	296798		yafC	hypothetical transcriptional regulator	Putative or unknown function	TAACAGCAGTAATCAGATGACACGCAGTATGCCTGGATGTTTTAATGACAA
34	Chr	302283	P	-	SL1344_0256	STM0261	301353	302108		gloB	probable hydroxyacylglutathione hydrolase	Putative or unknown function	TGGGAGACCGCGCACGCTTCGGAATTGATTTCTGCGCTTAAATTACCGATT
35	Chr	302650	S	-	SL1344_0256	STM0261	301353	302108		gloB	probable hydroxyacylglutathione hydrolase	Putative or unknown function	CCCCCCCTGCTTTTTCCAGGGTAAGACATGAAAACGGCTATAATGTAGCAC
36	Chr	311028	P	-	SL1344_0265	STM0271	309915	310817		No Data	conserved hypothetical protein (SPI-6 associated)	Putative or unknown function	ATGATACAGATCAGGGACTAATTAGCAACTAAGCCGTTAATATTAAATAAT
37	Chr	342283	P	+	SL1344_0296	STM0300	342307	343020	SL1344_0296-0298	safB	salmonella atypical fimbria chaperone	Chemotaxis and motility	TAAGGCGCAATACACATCAAATCATCTATTTTTCTTTTACAATTTTTGATA
38	Chr	348004	P	+	SL1344_0300	STM0304	348088	349035	SL1344_0300-0301	sinR	LysR-family transcriptional regulator (SPI-6 associated)	Pathogenesis	CGATTCAGATGCTATTTTGCAGCCAATAGATTTTTTATTAAGATGATATCA
39	Chr	347905	S	+	SL1344_0300	STM0304	348088	349035	SL1344_0300-0301	sinR	LysR-family transcriptional regulator (SPI-6 associated)	Pathogenesis	GTTCGGCGACAACCTTGACGATCACGTCTGAGATAGGGTATTTACACTGAG
40	Chr	350122	P	-	SL1344_0302	STM0306	349371	350090		pagN	adhesin/invasin protein PagN	Pathogenesis	TGGGCTTCGTTTATGTAATCGTTATATCACACCCTATACCGTGAAACTTGT
41	Chr	350177	S	-	SL1344_0302	STM0306	349371	350090		pagN	adhesin/invasin protein PagN	Pathogenesis	TCATCTCATTTTTTACCCGCTTACAGAAAACCCAGCGTTACAATAGACCGT
42	Chr	384440	P	+	SL1344_0336	STM0341	385057	385821	SL1344_0336-0337	No Data	Trans membrane regulator	Regulators	CTGTGATCATTGCTAAATATTTTTTCATAGACATATGATAATGTTCCTGTA
43	Chr	386553	S	+	SL1344_0338	STM0343	386594	388168		No Data	putative rtn protein	Putative or unknown function	CTCTCAATATTGCTTTTCTATATTAATGTTACTTTAGTTATCCTATCAAAG
44	Chr	402753	P	+	SL1344_0352	STM0357	402817	404775	SL1344_0352-0353	mod	type III restriction-modification system enzyme (StyLTI) modification methylase	DNA/RNA replication, recombination, and repair	AACAAAGGTTAATGATGGCATCTGCCGTTCGTGACCATTACAATCATCGCT
45	Chr	415132	S	-	SL1344_0360	STM0365	414298	414930		yahN	RhtC-like transporter	Putative or unknown function	AACCTTGTAGCCAGTTTTCATAGCAAAACCCTCGTTTTATTATTACGCCAT
46	Chr	415402	S	-	SL1344_0360	STM0365	414298	414930		yahN	RhtC-like transporter	Putative or unknown function	TATGATGCAATGCTTTTATTTCTTTTTATAAATATCAGCCGTACCATGAAT
47	Chr	427583	P	+	SL1344_0369	STM0374	427673	428296		yaiV	DNA-binding transcriptional regulator	Regulators	CGGTGATGTTGATCAAGACTGGTCTGCAAACGTTGGTGTTAAATATACCTG
48	Chr	432592	P	-	SL1344_0373	STM0378	432212	432520		yaiY	inner membrane protein	Putative or unknown function	TGGATACATTTCGTATGTGAAATTACCATGATTCTGATATTGACAAACACA
49	Chr	433344	I	-	SL1344_0375	STM0380	433029	434123		ddlA	D-alanyl-alanine synthetase A	Murein and peptidoglycan metabolism	TGCGGCGAAATCGTACTGAACAGCGAATTTTACGCCTACGATACTAAGTAT
50	Chr	436568	S	+	SL1344_0378	STM0383	436585	436851		yaiB	conserved hypothetical protein	Putative or unknown function	AGTACTTTCAGCCTCTAGGCAGTGGTTCTTCATAGTGATAACGTCACCCTG
51	Chr	440204	P	+	SL1344_0383	STM0388	440331	440876		aroL	shikimate kinase II	Amino acid/polyamine metabolism	AATGAAAAATTTACAGTTTATTCATTTCTGATTCTTGCTATAGTACTAATA
52	Chr	440280	S	+	SL1344_0383	STM0388	440331	440876		aroL	shikimate kinase II	Amino acid/polyamine metabolism	ATTATTATTTACATTTATGCGTTGTACTAGTTAGATGATATGATTATAACA
53	Chr	440341	I	+	SL1344_0383	STM0388	440331	440876		aroL	shikimate kinase II	Amino acid/polyamine metabolism	CAAATCCTGCGTATGCGCAGTTCCTGGGGGAACGCCTGCTATGATGCAACC
54	Chr	441177	S	+	SL1344_0385	STM0390	441345	442022		aroM	AroM protein	Amino acid/polyamine metabolism	CCCCTAAATTGTATCTCCATCACATTCTTGAAACATTTATACTGGCAACTA
55	Chr	441214	P	+	SL1344_0385	STM0390	441345	442022		aroM	AroM protein	Amino acid/polyamine metabolism	TATACTGGCAACTAAAACCGTAAATTAAGCGATAACAATACAATATTGGAG
56	Chr	442066	P	+	SL1344_0386	STM0391	442093	442377		yaiE	conserved hypothetical protein	Putative or unknown function	TGTCTAATTTTACGTGACAGGCCGAACGTCAGGACTCTATATTGGGTGTTA
57	Chr	443361	S	+	SL1344_0388	STM0393	443452	444360		yajF	hypothetical ROK-family protein	Putative or unknown function	TTTTGAACCACAGCATGATAATTTCCACGGCCTTGTCGTTAAATCCAGGCG
58	Chr	445671	P	-	SL1344_0389	STM0394	444382	445554		araJ	transmembrane efflux protein	Electron transport/energy metabolism	GTGTCATCCTGCGCACAGCATACCGTCATGACATAGCATAATAATGAATAC
59	Chr	450089	P	-	SL1344_0391	STM0396	448864	450066		sbcD	exonuclease SbcD	DNA/RNA replication, recombination, and repair	CGGTAAATTGCGCCCAAAAATGGAAGGGATGACGTGTATAATCCCGTTCAC
60	Chr	458199	S	-	SL1344_0397	STM0402	457559	458161		No Data	thiol-alkyl hydroperoxide reductase	Stress responses	TTGTCAAGACCGCATTGTTTTGTCGCTTCGCCCTCCCTATACTGCCCGCGT
61	Chr	461435	S	+	SL1344_0401	STM0406	461457	461789		yajC	preprotein translocase subunit	Transport and binding proteins	AGTTTTACCAACGTCAGGGGCGACCCGTTCCACCTTTGAACGTTGATTAAT
62	Chr	463625	P	+	SL1344_0403	STM0408	463675	464646		secF	protein-export membrane protein SecF	Transport and binding proteins	GCGACGTCGATGTTTACCGCGATTATCGGTACGCGTGCTATCGTAAACCTG
63	Chr	464744	P	+	SL1344_0404	STM0409	464794	465159	SL1344_0404-0405	No Data	conserved hypothetical protein	Putative or unknown function	TTTTATTTATGTACCATGACGATAAACATTACTGACAGTATGCTGTCAGGA
64	Chr	466650	p	+	SL1344_0406A	N/A	466832	466939		ldrA	small toxic peptide. Toxin-antitoxin system	Stress responses	TTTTGTTTTTAAGTCCTGCCGATACTGGCGAGCAGAGTAGAATCAGCGGTA
65	Chr	477213	S	-	SL1344_0418	STM0424	476902	477144	SL1344_0418-0415	xseB	exodeoxyribonuclease small subunit	DNA/RNA interactions and degradation	GTATATCACTATCACGGACATCTTGCGCATTTCCCCTTACCATTGCGCGTT
66	Chr	481848	P, I	-	SL1344_0422	STM0428	480509	481618	SL1344_0422-0420	phnT	probable ATP-binding component of 2-aminoethylphosphonate transporter	Central intermediary metabolism	TCCCTTATGTCATTGGCCTGGTCCAGGGGGCGCCGCAGAGTGAAAATGGTA
67	Chr	483576	P	-	SL1344_0424	STM0430	482835	483554		phnR	probable regulator of 2-aminoethylphosphonate uptake and metabolism operon	Central intermediary metabolism	GAAAATCGCGCTGCAACAAAAAATTCATCTCTGCTTGTATAATGGCGGCAG
68	Chr	500225	P, I	-	SL1344_0439	STM0445	499605	500183	SL1344_0439-0438	yajG	putative lipoprotein	Putative or unknown function	ACCTGCGTTGACCACTTCCCCTCGCCGTTAGCGGTGTTATGATGGCGGGAA
69	Chr	500921	S	+	SL1344_0441	STM0447	501151	502449		tig	trigger factor	Protein folding, degradation and stabilization	GCGGGCCGTTTTGTTTTGTCTGAATTTTGAGCGTGTCGTACAGTATTCAGA
70	Chr	502573	P	+	SL1344_0442	STM0448	502696	503319	SL1344_0442-0443	clpP	ATP-dependent clp protease proteolytic subunit	Protein folding, degradation and stabilization	TTTTGCATGGTAAGGGTGCGAAAACCGCGTTTCAGTGTTAGCGTTAGAGCA
71	Chr	502661	S	+	SL1344_0442	STM0448	502696	503319	SL1344_0442-0443	clpP	ATP-dependent clp protease proteolytic subunit	Protein folding, degradation and stabilization	CATTACAGAGGGACTGGCTGATAATCCGTCCATCAGGTTACAATCAGTACA
72	Chr	513652	P	-	SL1344_0450	STM0456	511917	513617		ybaE	putative solute-binding protein	Putative or unknown function	GTGACGCGGTTAACTTGTTGTTCAGTATTACCTGAGATATACGGAAGTAAT
73	Chr	513687	P	+	SL1344_0451	STM0457	513718	514536		cof	conserved hypothetical protein	Putative or unknown function	TTTTATCTGTTCACTATTACTTCCGTATATCTCAGGTAATACTGAACAACA
74	Chr	525813	P	+	SL1344_0462	STM0469	525840	526100		rpmE2	putative 50s ribosomal protein L31 (second copy)	Putative or unknown function	GTGAATGTTTACCGGTTGAAAAAGGAGCGTTGATAGCGTATTTTATTGTTA
75	Chr	528669	S	-	SL1344_0467	STM0474	527865	528239	SL1344_0467-0465	ybaJ	conserved hypothetical protein	Putative or unknown function	TAAGGCCGCGCAAGCGGCCTTTTTTACGCAAAAATCATAAAATACGCTTAT
76	Chr	533179	P	-	SL1344_0469	STM0476	531907	533100	SL1344_0469-0468	acrA	acriflavin resistance protein A precursor	Stress responses	TTACAGGCGTTAGATTTACATACATTTATGGATGTATGTACCATAGCACGA
77	Chr	548350	P	-	SL1344_0483	STM0490	547361	548332		aes	acetyl esterase	Fatty acid/lipid metabolism	CGGACGACGAGATCGCAGTTTCTCCAGCCGCGTTTTTTACAATGGTTCACT
78	Chr	553005	P	-	SL1344_0486	STM0493	551729	552949		fsr	fosmidomycin resistance protein	Stress responses	TTTCAGAATTGAGACTTCCTTCAAACACATTTCACAGGTATGTTAGGCAAG
79	Chr	553061	S	-	SL1344_0486	STM0493	551729	552949		fsr	fosmidomycin resistance protein	Stress responses	CTGACTCAATATCAACCGCAGAAATTACCTTTCCTTGCAATAATAGACAAA
80	Chr	553078	P	+	SL1344_0487	STM0494	553122	554774		ushA	UDP-sugar hydrolase	Nucleotide and nucleoside interconversions	GTGTTTGAAGGAAGTCTCAATTCTGAAAACATATTTGTCTATTATTGCAAG
81	Chr	557308	P	-	SL1344_0490	STM0497	556452	557279		No Data	probable secreted protein	Putative or unknown function	AAATTTAACCGCACATCCTGTAGAAAAATAAAAAACAACATTTTATAATGT
82	Chr	559996	P	-	SL1344_0491	STM0498	557433	559934		copA	copper-transporting ATPase	Anions/cations and iron carrying compounds	CATATTTCCCCCTTGACCTTAACCTTGCTGGAAGGTTTAACCTTTATCACA
83	Chr	561944	P	+	SL1344_0495	STM0502	561974	562651	SL1344_0495-0496	ybbL	putative ABC transporter ATP-binding protein	Putative or unknown function	TTCAGTAAAGCATGTTCCCCCCTTATTAATTACAGGGATACACTATCGCTA
84	Chr	569169	P	+	SL1344_0502	STM0509	569210	570343		No Data	outer membrane protein	Cell surface/envelope	TCATTAAAAAATACACAACACGTAAGGTTTTATAACAGTTATTATTTGCCT
85	Chr	574297	S	-	SL1344_0506	STM0513	573174	574268		ybbB	tRNA 2-selenouridine synthase	Translation/protein modification	ACGCTGTTAAAAATCAAGCCACTTTGCGAATTGGCGCGTAAAATAGCGCAA
86	Chr	575319	S	-	SL1344_0507	STM0514	574338	575264		ybbS	hypothetical lysR-family transcriptional regulator	Putative or unknown function	AAGTAGATTTAGACCACAAATCAAACATGGCTATTATGTAAAACTACTTAA
87	Chr	575424	P	-	SL1344_0507	STM0514	574338	575264		ybbS	hypothetical lysR-family transcriptional regulator	Putative or unknown function	CTCGATTCCGTTTAACCGCGGTTTGGACTCTGTCCGGTTTCAATACCATGC
88	Chr	576005	P	+	SL1344_0509	STM0516	576052	576870		allR	negative regulator of allantoin and glyoxylate utilization operons	Central intermediary metabolism	TGAACTCTGTTTTGCGTGACGCTATTGGCCTTCTTGCATAAGATGAACATA
89	Chr	598582	S	-	SL1344_0529	STM0536	597956	598450		ppiB	peptidyl-prolyl cis-trans isomerase B	Translation/protein modification	TTTTTAACATCGAAGATTCCGTATAGACGTGTGTGGGTAATAATCTCCGTA
90	Chr	598636	S	-	SL1344_0529	STM0536	597956	598450		ppiB	peptidyl-prolyl cis-trans isomerase B	Translation/protein modification	CCCCGGCATGAATGGGTTTGAATTCCTCTTTTTGGCGTGTCAGTGTATTAA
91	Chr	598576	P	+	SL1344_0530	STM0537	598623	600008		cysS	cysteinyl-tRNA synthetase	Translation/protein modification	GTAAGCTGCGATCACCTTGCAAAGTGTGCTGCTTCGATTACGAATAATATG
92	Chr	612097	P	-	SL1344_0544	STM0551	611721	612032	SL1344_0544-0543	No Data	hypothetical protein	Putative or unknown function	TAAGTAACGATACCTACAGGCATTTTTTTAACGCTGCCACAATGATGCCCA
93	Chr	612821	P	-	SL1344_0545	STM0552	612194	612790		fimW	fimbriae w protein	Chemotaxis and motility	TTAAGGCCGCCAGTATTTAGAAAATCAATCAGTTTCTTTAATATTTCACCA
94	Chr	619652	P	-	SL1344_0551	STM0563	618746	619600		No Data	hypothetical araC-family transcriptional regulator	Putative or unknown function	TAGCAAAAACAAGGGTAGAAATGACATTGAGTCCGAAATATAGTGAACAGA
95	Chr	623518	P	-	SL1344_0555	STM0567	622186	623361		No Data	conserved hypothetical protein	Putative or unknown function	AGATGTCGTGGGGAGTAAAAAGAAAAGAGTGCGCGCCGATATAGAACGTTA
96	Chr	626391	S	-	SL1344_0557	STM0569	625123	626370		ybdG	putative membrane protein	Putative or unknown function	GCGCAGGCGTCCTGATTTGCATAAATGCCATTCAGCAGTCATCATAGGCTG
97	Chr	626278	I	-	SL1344_0557	STM0569	625123	626370		ybdG	putative membrane protein	Putative or unknown function	GAAATGAATCACACCACGTCGCTGGTGGTGATATTTGGTATTATTTTTCTG
98	Chr	626636	P	+	SL1344_0558	STM0570	626681	628651		apeE	outer membrane esterase	Putative or unknown function	CTTTTTAACCAGAATGTTTAAAACGATTGCAATATCTCTGTCGGATAATGA
99	Chr	638319	S	-	SL1344_0568	STM0580	637634	638215	SL1344_0568-0566	No Data	putative tetR-family transcriptional regulator	Putative or unknown function	TCATGCGGCAGCCCTTGATTATGAGTGAGTAAGCACTCATTATAGAAAGCA
100	Chr	649040	P	+	SL1344_0577	STM0589	649084	650220		fepE	ferric enterobactin transport protein	Anions/cations and iron carrying compounds	CGCGTAAAGATTGTTTCGGATAATTCTGACTTGCTGTTAGAATCTCTGACA
101	Chr	664351	P	+	SL1344_0591	STM0603	664379	665539		ybdL	putative aminotransferase	Putative or unknown function	TCTAAACGTCTTGATTGCCAAATACTAACACCCTGTGATAGTGTGTCAACA
102	Chr	668532	P	-	SL1344_0594	STM0606	667531	668433	SL1344_0594-0592	ybdO	putative lysR-family transcriptional regulator	Putative or unknown function	ACTGTAATTATTTACTCGCTAAAATATTCATAACTGTGGTATTTTAGTTTA
103	Chr	668462	S	-	SL1344_0594	STM0606	667531	668433	SL1344_0594-0592	ybdO	putative lysR-family transcriptional regulator	Putative or unknown function	TTAATAAACATAACTCTGGTAAATTATTGAGATTAAGTCATAATCATGGAA
104	Chr	669913	S	+	SL1344_0596	STM0608	669937	670500	SL1344_0596-0597	ahpC	alkyl hydroperoxide reductase c22 protein	Stress responses	TAATGGAAACGCATTAGCCGAATCAGCAAAATTTCGTTAACTTACTCCTCA
105	Chr	687434	P	+	SL1344_0613	STM0625	687515	689176	SL1344_0613-0614	dpiB	sensor kinase DpiB	Regulators	TGGGTTTTAGTTGTTTAATTGATTTAATGTGGGGAATCTGTAACGATTGGT
106	Chr	691316	P	-	SL1344_0615	STM0627	689879	691132		dcuC	C4-dicarboxylate anaerobic carrier	Transport and binding proteins	CGTGATTTTAATCAGTAAGGCGCCATCCTTTATTCGGTACATTTTTATACC
107	Chr	691627	P	+	SL1344_0616	STM0628	691643	692215		pagP	antimicrobial peptide resistance and lipid A acylation protein	Pathogenesis	TTTATAGTTTGTTAAGATTTTATTCAGGTTAATGTTGTTATTATCACAGTC
108	Chr	691415	S	+	SL1344_0616	STM0628	691643	692215		pagP	antimicrobial peptide resistance and lipid A acylation protein	Pathogenesis	CGGCGCGGTTATTTTTTCATGTCATTGCTAAAGATGAAATATACTTATACG
109	Chr	693081	P	-	SL1344_0618	STM0630	692670	693053		crcB	putative membrane protein	Putative or unknown function	ACCTCTGTCAGGACTCGCCAATTATGCGTGTTCGGCGTTACACTCCTCTTG
110	Chr	693071	P	+	SL1344_0619	STM0631	693144	693932		ybeM	possible hydrolase	Putative or unknown function	GCCGATAAAAACTGCTAAAAGAAGCTGTAACACTGCCGAATCCTTTATTTA
111	Chr	695401	P	-	SL1344_0621	STM0633	694350	695315		lipA	lipoyl synthase	Fatty acid/lipid metabolism	GCCGGGCTGTCAGGCTGCTTTATGGCCCTTATCAATGATATACTGCGTGTC
112	Chr	699149	P	-	SL1344_0625	STM0637	697889	699100		dacA	D-alanyl-D-alanine carboxypeptidase fraction A	Murein and peptidoglycan metabolism	ATTAACAAAGTCACGCGGAAAGTCAGATGCCTGCCAGTTATGCTTTTGCTA
113	Chr	704319	P	-	SL1344_0630	STM0642	703836	704153	SL1344_0630-0626	ybeB	Ribosome associated protein	Translation/protein modification	TTTACAAAAATGGCGATGCTTTCTGTGACGTGGGATGGGATGATAATCTGG
114	Chr	704407	S	-	SL1344_0630	STM0642	703836	704153	SL1344_0630-0626	ybeB	Ribosome associated protein	Translation/protein modification	CAGCGGTTTCGCCCATTGACAGCCCCCGACAGGCTGTTATTCTCCGCAGCC
115	Chr	705263	P	-	SL1344_0631	STM0643	704482	705090		cobC	alpha-ribazole-5'-phosphate phosphatase	Anions/cations and iron carrying compounds	TCACGCTGACAGGCATACCCAGCGGATTAATGTTTGCGCTAAAATCCAGTA
116	Chr	725928	P	-	SL1344_0650	STM0661	724969	725904	SL1344_0650-0649	ybeK	probable nucleoside hydrolase	Nucleotide and nucleoside interconversions	TACTTCTTCGCTTCTCGAAACGTATCCAGCCGGGCGTTAACCTTGTCACAA
117	Chr	735437	P	-	SL1344_0659	STM0670	733898	735322		miaB	MiaB protein (putative tRNA-thiotransferase (or tRNA-methylthiotransferase))	Translation/protein modification	TTTCCGTTGGTTGATTTGTCATGGTCATTCATCCTGTTACGTTTTAGACAA
118	Chr	746739	S	+	SL1344_0668	STM0686	746832	748499		glnS	glutaminyl-tRNA synthetase	Translation/protein modification	GGAAACCTTCGCCGCTTTTTTTTACCGCAATTAGCCCCAATATTTTCTGCA
119	Chr	773787	P	+	SL1344_0689	STM0708	773872	774078		ybfA	putative exported protein	Putative or unknown function	AGTGGTCGGATGAGTAGTAAAATTACACCGAAAGCGGTACTATTTTAATCA
120	Chr	781016	P	+	SL1344_0697	STM0716	781039	781605		fimB	type 1 fimbriae regulatory protein	Chemotaxis and motility	TTAGCGAAAATTAAACTCATCTGATCAGTGATTTTTTAGTATATTACTCAT
121	Chr	780983	S	+	SL1344_0697	STM0716	781039	781605		fimB	type 1 fimbriae regulatory protein	Chemotaxis and motility	TGGATTTTAAGCTGTTTACGCATAGCAACTTTTTTAGCGAAAATTAAACTC
122	Chr	808651	P	+	SL1344_0722	STM0740	808940	810508	SL1344_0722-0724	cydA	cytochrome d ubiquinol oxidase subunit I	Electron transport/energy metabolism	TCAATATTTAAATGTTGGAAAAGAGCATCAAAACTGGTTAAATTGTCCGTG
123	Chr	822242	P	-	SL1344_0735	STM0758	821273	822211		ybgR	probable cation transport protein	Anions/cations and iron carrying compounds	TTTCGCTCTCCTTTTTATTTTGTCAGCGAAAAATCAGTATGATGTCTACAG
124	Chr	825511	S, I	+	SL1344_0740	STM0763	825709	826599		No Data	LysR-family transcriptional regulator	Regulators	TCTTTATCATATGCTTTACGAAAAGAACACATGAGATTATCATCCAGTTCA
125	Chr	827566	P, I	-	SL1344_0741	STM0764	826600	827526		No Data	LysR-family transcriptional regulator	Regulators	TTTAATCAAATAATTTCCTCTTAAAATCTGTCTGTGTATAATGCTACTTAT
126	Chr	836405	S	-	SL1344_0749	STM0772	835617	836369		gpmA	phosphoglycerate mutase 1	Central intermediary metabolism	TGGTTATGCGTAAGCATTGCCGCCAACACCTCGCGGCAATATAATGAGAAT
127	Chr	840876	P	-	SL1344_0753	STM0776	839835	840851	SL1344_0753-0750	galE	UDP-glucose 4-epimerase	Central intermediary metabolism	TTTATTACATGTCACACTTTTCGCATCTTTGTTATGCTATGGTTATTCCAT
128	Chr	848304	P	-	SL1344_0761	STM0784	847453	848271		ybhA	conserved hypothetical protein	Putative or unknown function	TTCAGACGCAGAATTTTGTCTGCTTACCGTCCCGGTGTACCATGCCGACAG
129	Chr	863416	P	+	SL1344_0775	STM0798	863688	865709		uvrB	excision nuclease ABC subunit B	DNA/RNA replication, recombination, and repair	CGGCTTGAGAAAATATCCCTTTTCAGACAGCAAGTTATATAAAATCAATGG
130	Chr	866177	P	+	SL1344_0776	STM0800	866199	868496		slrP	leucine rich repeat	Putative or unknown function	TGACCTCTTATTTAAAGTTGAGAATATCCTTATCTGTTACTTTAGGTTACG
131	Chr	869519	S	-	SL1344_0777	STM0801	868588	869496		ybhK	conserved hypothetical protein	Putative or unknown function	GCCGGTCGGCTAATTGCTGAAAACCCGCGACTTGCGCTACTGTAGCGCTGC
132	Chr	886386	P	+	SL1344_0797	STM0821	886512	888557		dinG	probable ATP-dependent helicase DinG	DNA/RNA replication, recombination, and repair	AACCGGTAAAAAAGGTACTTCCCGCCCCTGAAATGTGACACAATAGTGGCT
133	Chr	888524	P, I	+	SL1344_0798	STM0822	888587	889561		ybiB	glycosyl transferase family protein	Polysaccharide and LPS metabolism	CCTGTTTTTCCGATAGAGCAGCCTGCCGTGCCAGACGTTATAGTAAAACCA
134	Chr	888470	S, I	+	SL1344_0798	STM0822	888587	889561		ybiB	glycosyl transferase family protein	Polysaccharide and LPS metabolism	TATGATAAGCGTTTGTTGACCAAAAACTACGGACAGCGTTTACTGAATGCC
135	Chr	890286	I	-	SL1344_0800	STM0825	890262	890528		ybiI	hypothetical Zinc-finger containing protein	Putative or unknown function	CAGGAGAAAGATTTACATAACGCAACATTTTCAGGATATAATCGTAGAGGT
136	Chr	890716	P	+	SL1344_0801	STM0826	890733	891665		ybiN	conserved hypothetical protein	Putative or unknown function	TCGCGGTGGTATATTTACCCCGTGGCGTTATACGGGTATCTTACGCCGCTG
137	Chr	894143	P, I	-	SL1344_0802	STM0827	891662	893884		ybiO	putative membrane protein	Putative or unknown function	TCATGCAGGATCTGGCGGAAGAAGGCATGACCATGGTCATTGTCACTCACG
138	Chr	904131	P	-	SL1344_0812	STM0837	903158	904078		ybiS	putative exported protein	Putative or unknown function	TACACATCTGAATTCCCTGTTTACTGGAATGCACCTATAATGCGCTCCCAA
139	Chr	906291	P	+	SL1344_0814	STM0839	906498	907241		No Data	inner membrane protein	Putative or unknown function	AAATTGCGAATATATTTTGTGGTAAACATATTGTAATGTTATTTTCTTTAT
140	Chr	913965	P	-	SL1344_0820	STM0844	913046	913945	SL1344_0820-0819	pflE	putative pyruvate formate-lyase 3 activating enzyme	Putative or unknown function	GTTGACGCACATCAAGATAGCTTTCATTCGAAAGTAATTTAATCTTTATAT
141	Chr	925412	P	+	SL1344_0830	STM0854	925442	925957		No Data	conserved hypothetical protein	Putative or unknown function	TTAGATAAAAGCTAATTCAGAAAATTATTTTTTTAAGATATATTGAATTAT
142	Chr	932729	P, I	-	SL1344_0835	STM0859	931284	932174		No Data	LysR transcriptional regulator	Regulators	TCACCCGTCCAGTGACGGTCGCCCCGGTTTTCAGTGATATATTTATGGATA
143	Chr	934609	P	-	SL1344_0838	STM0862	933888	934514		yliJ	glutathione s-transferase family protein	Stress responses	TTGGTAAAGTTTTTAAAGTTTATGCAATAACATCCCGTTACGCTTCCTTCA
144	Chr	944650	S	+	SL1344_0849	STM0873	944768	945058		ybjC	putative membrane protein	Putative or unknown function	TCTCTCCTCGAACATAAAGCCAGACGGCGAACAGGTGTTATCATGCCGCGA
145	Chr	946780	P	+	SL1344_0853	STM0876	946820	947296		ybjN	conserved hypothetical protein	Putative or unknown function	TCGTGGATTCCGCCGTAGTACGAAGCACGCTTTTTGCGTAAGCTGTGCCGG
146	Chr	946722	S	+	SL1344_0853	STM0876	946820	947296		ybjN	conserved hypothetical protein	Putative or unknown function	GTGGATAGAACGTCACGCTACGCCTGAATTTTGCCTTAAAATCGGCGGCTA
147	Chr	951803	P	+	SL1344_0858	STM0881	951857	952330		ybjO	inner membrane protein	Cell surface/envelope	TCGCGATATCCAGCGTGCAAGACGCGGCTGAAGCCACTAAAATCTTCCACT
148	Chr	961777	S	+	SL1344_0869	STM0930	961904	962227		orfB	conserved hypothetical protein	Putative or unknown function	CTAAGCAGAAGCGCGCACGGGATGAGCAAAGAGAGTTTAGAATAGCGCATG
149	Chr	971184	P	-	SL1344_0876	STM0937	969500	971152	SL1344_0876-0875	hcp	prismane protein homolog (hybrid-cluster protein)	Putative or unknown function	ATGGCAGAAATCCCTTTTATCCCTTTGTTCACAGGCATAACCTTAAACATG
150	Chr	992942	S	-	SL1344_0896	STM0958	991765	992733		trxB	thioredoxin reductase	Electron transport/energy metabolism	CAGCAGGTGATTGTCAAAGCAAAACATCGATTTTTAGTACAACATGCCAGT
151	Chr	1001754	P	+	SL1344_0902	STM0964	1001888	1004332	SL1344_0902-0904	dmsA	anaerobic dimethyl sulfoxide reductase chain A precursor	Anaerobic metabolism	GTTTGATACCGGACAATAATCCCTACCCTATTAGGGGTAATACTGATTTCG
152	Chr	1005989	P	+	SL1344_0905	STM0968	1006175	1007323		ycaD	probable transport protein	Putative or unknown function	AAAACGAAGCTAAAGGAACCATGAAATTTTTCGACTGAACAAAACGCCGAT
153	Chr	1006145	S	+	SL1344_0905	STM0968	1006175	1007323		ycaD	probable transport protein	Putative or unknown function	GCCCATGCGGAGCCGATTGACAATGTTTTTGGCGATGGCATGATGCGCATG
154	Chr	1007398	P	+	SL1344_0906	STM0969	1007541	1008962		ycaM	probable transport protein	Amino acid/polyamine metabolism	CGTGAGTCTTGCATACTCTTTGTTTATGTTTTACGTGAAATAATTGACCTG
155	Chr	1015300	S	-	SL1344_0911	STM0974	1014005	1014862	SL1344_0911-0910	focA	probable formate transporter (formate channel)	Putative or unknown function	CTACAAGCGTTCCCGGCGCATCAGTCCTTGTTAAAAGCGTATGATAAATTA
156	Chr	1022050	S	+	SL1344_0918	STM0981	1022358	1024031	SL1344_0918-0919	rpsA	30S ribosomal protein S1	Translation/protein modification	TTGACGCCTCCTCGGAGGAACGTGCGCATCGACGTATGCTACAGTTGCAGG
157	Chr	1032162	P	+	SL1344_0926	STM0989	1032188	1033081		No Data	conserved hypothetical protein	Putative or unknown function	CTTGATCTGATACGGGTGACATCTGTCCATACGACGCTCATTATTAAAGCA
158	Chr	1043557	S	+	SL1344_0933	STM0996	1043688	1044236		ycbK	putative exported protein	Putative or unknown function	GGGGGAGGGCCATCTTGACGCGGGCTTTATCGGCAGTTAAGGTGCCTTTCG
159	Chr	1044188	P	+	SL1344_0934	STM0997	1044264	1044911		ycbL	conserved hypothetical protein	Putative or unknown function	ATTCGCAAAGCGGCGTTATCTATGCGCGCAGGTGGTGTAGGATATTACCCA
160	Chr	1050391	P	+	SL1344_0939	STM1002	1050425	1051639		dpaL	diaminopropionate ammonia-lyase (ec 4.3.1.15) (diaminopropionatase) (alpha,beta-diaminopropionate ammonia-lyase)	Electron transport/energy metabolism	AACGCGAGTTCTTTGCTTGTTTCTACTCAATAATTGACAAAAATATATTAT
161	Chr	1050250	S	+	SL1344_0939	STM1002	1050425	1051639		dpaL	diaminopropionate ammonia-lyase (ec 4.3.1.15) (diaminopropionatase) (alpha,beta-diaminopropionate ammonia-lyase)	Electron transport/energy metabolism	TGGGCATTTTCGCGCCATTTAACAGCAATAAGCATAGTACTATCATAATCA
162	Chr	1066277	S	+	SL1344_0958	STM1020	1066521	1067123		No Data	Gifsy-2 bacteriophage protein	Transposon functions/phage	GAGTCCTATCAGATCTTGCTGATAATTTGCGGGTGACTATAACTGATGCTA
163	Chr	1071224	P	-	SL1344_0965	STM1026	1070502	1071188		No Data	putative bacteriophage encoded virulence protein	Putative or unknown function	TTGCGTGCTGAGTGAATTCTGTTTGACAAAAACATGCTATTTATAGAATGT
164	Chr	1100431	P	+	SL1344_0997	STM1057	1100463	1103075		pepN	aminopeptidase N	Protein folding, degradation and stabilization	GATGAACATTCTGCGTAGCGCGATTTGCGCAACAGGAATAGACTGGAGTCG
165	Chr	1106133	P	-	SL1344_1000	STM1060	1104998	1106107		No Data	conserved hypothetical protein	Putative or unknown function	AATTGTTGCGCATTATAGCTAATCTCACGCCCATGTCATAAAGTTGAAGGC
166	Chr	1125326	P	-	SL1344_1016	STM1076	1124846	1125304		mgsA	methylglyoxal synthase	Electron transport/energy metabolism	TTTTTTTCTCTTTCTCTTGCAGCATCAAGCGCTTCCAGTAATCTGTAGACA
167	Chr	1127636	I	-	SL1344_1020	STM1080	1127068	1128279		yccW	Ribosomal RNA large subunit methyltransferase I	Translation/protein modification	GTCGAGCGGCAGTGTTGCCGTATTCAGCGCCCACACAGTAAACTGATAGCG
168	Chr	1140639	P	-	SL1344_1035	STM1096	1139959	1140639	SL1344_1035-1034	copR	Copper resistence response regulator	Regulators	CTTGTTGGAGATTTACGGATTCGCTAACAAGCCTATGGCATACTGCGTTGA
169	Chr	1162809	P	+	SL1344_1060	STM1122	1162830	1163468		ycdC	putative transcriptional regulator	Putative or unknown function	GATTTCCGGCGGTTTTTTTGTTTATAAGCCGGATTTGGTATGCTTGCGTCC
170	Chr	1172531	P	-	SL1344_1065	STM1127	1171598	1172479		No Data	putative transcriptional regulator	Putative or unknown function	TACTTACATCGCGCTTTTTTTCATGCCGCAGACTTGATAGGCTCTGCTCTG
171	Chr	1175310	P	-	SL1344_1067	STM1129	1174597	1175277		No Data	conserved hypothetical protein	Putative or unknown function	TTCTATCTTTTTGCTTGATGTAGCAACACTCCAAGACATAACATAAAACGG
172	Chr	1175757	P	+	SL1344_1068	STM1130	1175783	1176943		No Data	conserved hypothetical protein	Putative or unknown function	TTGTCATTGTCATTGTTGAAATTGTGCACCATAAGATCACTAATGATGAAG
173	Chr	1183644	P	+	SL1344_1075	STM1138	1183644	1184126		ycdZ	inner membrane protein	Cell surface/envelope	ATGTGTGCGTGATCTCATTAATGTGCCGCTTTTCTGTTATGATGCGCGCCA
174	Chr	1186666	P	-	SL1344_1079	STM1142	1185868	1186518	SL1344_1079-1076	csgD	csg operon transcriptional regulator protein	Regulators	GTTACAAGTTTAACACTTGCTTTAAGATTTGTAATGGCTAGATTGAAAACA
175	Chr	1188529	P, I	+	SL1344_1083	STM1146	1188744	1189064		ymdA	conserved hypothetical protein	Putative or unknown function	CCTGCTAATCAACCGATTGAGTTGTCTCGTCTTAGTGTAAATATATCTTCA
176	Chr	1189851	S	+	SL1344_1085	STM1148	1189860	1191116		ymdC	conserved hypothetical protein	Putative or unknown function	GCCTGACCGAAATGGCGGCGCGGACGCTGGATGTGCAGTATTATATTTGGG
177	Chr	1192739	P	-	SL1344_1086	STM1149	1191133	1192287		mdoC	Glucans biosynthesis protein C	Cell surface/envelope	AGGGGTCTTTAAGTTGTTCCAGTAGGCTTTATCGCTGTTAAACTGGATCTG
178	Chr	1192474	S	-	SL1344_1086	STM1149	1191133	1192287		mdoC	Glucans biosynthesis protein C	Cell surface/envelope	CCCCTTTGTGTGCTTATATCGATCCGATCCATTTTAATGGATAATCAGGCA
179	Chr	1192347	S	-	SL1344_1086	STM1149	1191133	1192287		mdoC	Glucans biosynthesis protein C	Cell surface/envelope	GCGTGCTTATCCTGGAGACAGGTTGTCGGAGTTGGTGTAGGGTTGCTACCG
180	Chr	1199781	P	+	SL1344_1093	STM1156	1199897	1200949		yceA	conserved hypothetical protein	Putative or unknown function	TGAGCAAAAATATGTAGCAGGAGAGTGGCGATTAAATCGACAATTGTTGTT
181	Chr	1199825	S	+	SL1344_1093	STM1156	1199897	1200949		yceA	conserved hypothetical protein	Putative or unknown function	TGTTGTTAATTATTTAGTGTAAAGCAGGAAATGTAGCGCAAAATGTGTGGA
182	Chr	1214363	P	+	SL1344_1111	STM1174	1214389	1214805	SL1344_1111-1119	flgB	putative flagellar basal-body rod protein FlgB (proximal rod protein)	Putative or unknown function	TGCGTTTATTCCGGCGATAACGCGCGCGTGAAGGCATTTAAGCTGTCGGCT
183	Chr	1231321	P	-	SL1344_1126	STM1189	1230633	1231217		yceF	septum formation protein Maf	Cell division	AAGGCAGCCTGCGGTTGCCTTTTGCCAATAATTCGCACACATTGCGGGTTA
184	Chr	1231246	S	-	SL1344_1126	STM1189	1230633	1231217		yceF	septum formation protein Maf	Cell division	GTCAGTATGACAGGCTTGAAGACCGAAGAGCATAGTTTAAGATGGCTCTCA
185	Chr	1231270	P	+	SL1344_1127	STM1190	1231415	1231936	SL1344_1127-1132	yceD	conserved hypothetical protein	Putative or unknown function	TTTTTCCCTCAGATATAGCGTAATGATGAGAGCCATCTTAAACTATGCTCT
186	Chr	1250501	P	+	SL1344_1148	STM1211	1250596	1251900		ndh	NADH dehydrogenase	Central intermediary metabolism	GCACATCAATTTTGGTATGACCAATGCACCGTTCATGCTATTCTCATATCA
187	Chr	1253426	S	-	SL1344_1150	STM1213	1252693	1253328		ycfQ	putative TetR-family regulatory protein	Putative or unknown function	TCTTTTTATAATGATCGTTATATAATTTATAAAGATGTTATTTTTCATGTG
188	Chr	1253515	P	+	SL1344_1151	STM1214	1253570	1253827		ycfR	putative secreted protein	Putative or unknown function	ATTATAAAAAGAGGTTGACGTGTGATGTAGATCACATCTATGATTAACTTA
189	Chr	1266222	S, Alt, I	-	SL1344_1160	STM1223	1264891	1265670	SL1344_1160-1159	potC	spermidine/putrescine transport system permease protein PotC	Amino acid/polyamine metabolism	GTGGATTAAAACAGCTTGAAATACCACCACCGCATACCCACATACCTATTG
190	Chr	1278539	P	-	SL1344_1171	STM1233	1277714	1278361		ycfC	conserved hypothetical protein	Putative or unknown function	GATTAACGCGCTGAATGACGATCGTATCGAGGTCATTTTTGACGAGCCGGT
191	Chr	1279576	P	-	SL1344_1172	STM1234	1278442	1279548		trmU	Probable tRNA	Translation/protein modification	GCCGTTTACAGAGGGTGTCAAGTAAAGGGCTGCGTGATAGAATACGCCGCC
192	Chr	1282751	P	+	SL1344_1177	STM1239	1282936	1284060		No Data	predicted bacteriophage protein	Putative or unknown function	TTGGCTATTTTTTGAAAGTGCCTTACCAGATTTATTGTTATTATCAGGAGA
193	Chr	1294855	P	-	SL1344_1189	STM1253	1294301	1294831		No Data	putative cytochrome	Putative or unknown function	TCAGCCCCCGCTTTAAGGTTCTGTTAAGATTTTACGCATACTCTACAAGCA
194	Chr	1295432	S	-	SL1344_1190	STM1254	1294980	1295294		No Data	outer membrane lipoprotein	Cell surface/envelope	ATGCACAAGTTATAAAAACACGGCATGGGGAATATATCCGGCTTCAACGGA
195	Chr	1295516	P	-	SL1344_1190	STM1254	1294980	1295294		No Data	outer membrane lipoprotein	Cell surface/envelope	TGCTATGGAGTCCAACCGAAAAATGTTAACGCCGCCAGGGCTCGTGATGAT
196	Chr	1303294	S	+	SL1344_1199	STM1264	1303449	1304237		aadA	aminoglycoside-resistance protein	Stress responses	GCAGCAGGCATTGTTGCAAGAGATGGAAAACTGGCCTACCTATTATCCTTA
197	Chr	1306667	S	+	SL1344_1204	STM1269	1306706	1307251		aroQ	chorismate mutase	Amino acid/polyamine metabolism	TAAGCATTAATACCCATCTGTAATAATTACTTAATGTTATCTTAATAAAGG
198	Chr	1310955	P	+	SL1344_1212	STM1276	1310992	1311303		No Data	hypothetical protein	Putative or unknown function	CCCTGATACGAAAAAGTGACAACCTGCGGTCCGACGGGATATGATTAAGAA
199	Chr	1316893	S	-	SL1344_1218	STM1283	1315138	1316631	SL1344_1218-1216	yeaJ	conserved hypothetical membrane protein	Putative or unknown function	TTTCTTTAAATCGTTTCATAGTGCCTCCGAACGGAAGTACATTATTATCCT
200	Chr	1320958	S	+	SL1344_1221	STM1286	1321042	1321788		mipA	putative outer membrane protein	Putative or unknown function	CGATCATCAGCCGATCATCTGAAAATAATCGGTTGTGGTGATATTAAACGG
201	Chr	1321929	P	+	SL1344_1222	STM1287	1322078	1323274		No Data	putative regulatory protein	Putative or unknown function	GCGCTGTTGACCGGGTATGGCGCAGCCTTATGTGATTTATACTTTGTTACA
202	Chr	1323312	P	+	SL1344_1223	STM1288	1323371	1324228		No Data	putative oxidoreductase	Putative or unknown function	CGTTCGTCAGTGACAAGAAAATCGCCCCCTTGCGCGGTATGATGCCGGACA
203	Chr	1326798	S	+	SL1344_1226	STM1291	1326883	1327296	SL1344_1226-1227	yeaA	conserved hypothetical protein	Putative or unknown function	ATGTGACATCAGTCACGATTCGTGAGCCGCCATTTCGCAATGATCAAGTTT
204	Chr	1336898	P	-	SL1344_1234	STM1299	1335489	1336832		gdhA	NADP-specific glutamate dehydrogenase	Regulators	CGTCATTTTTTTCTTGCTTACCGTCACATTGCTGATGGTATAGTCGAAAAC
205	Chr	1345196	P	+	SL1344_1243	STM1308	1345410	1345895		spy	putative exported protein	Putative or unknown function	ATTCCTGGAGAATTGCTTTATTAATAAGCGTTGCTGCGTTATAGTTCTGCA
206	Chr	1351790	P	+	SL1344_1251	STM1316	1351797	1353152	SL1344_1251-1252	celF	phospho-beta-glucosidase B	Electron transport/energy metabolism	TCTTACGAGCGGGCATAGCGTAATACATATCAGTGTTATACACTGAAGGGA
207	Chr	1358360	P	-	SL1344_1255	STM1320	1356928	1358319		ydjN	putative sodium:dicarboxylate symporter	Putative or unknown function	ATATAAGAGCCAGCTCACAGTTCTGCTAATCTTGCGCGAACAGAATCGCTA
208	Chr	1359183	P	-	SL1344_1256	STM1321	1358456	1359055		ydjM	conserved hypothetical protein	Putative or unknown function	ACTCACTGACAGAGCTGACGGCGGCGCATCTACTCGGTTAAGATGTTTCCG
209	Chr	1359917	P	-	SL1344_1257	STM1322	1359193	1359861		yniC	putative hydrolase	Putative or unknown function	CCTGTTGATTCCCGTTTTCGCCTGATCTTTAAGGGCGATATACTAAGAACA
210	Chr	1359891	P	+	SL1344_1258	STM1323	1360010	1360546		yniB	putative membrane protein	Putative or unknown function	AATTTGACGTGGGGTTGACATCACAACCTCTCCTGTTGAGATTAAAAAATA
211	Chr	1365168	P	-	SL1344_1263	STM1328	1363971	1364930		No Data	outer membrane lipoprotein	Cell surface/envelope	TACAACGTGATATTCATATTGATACCAAAAAACATCGTATTATATGCATAA
212	Chr	1365293	P	+	SL1344_1265	STM1330	1365402	1366238		No Data	Putative DNA/RNA non-specific endonuclease	Putative or unknown function	TGGCTTCGATGTTTATCTGTTATTAATTTTTACCGTGATAGTGTTGTCTTT
213	Chr	1378806	S	+	SL1344_1277	STM1343	1378873	1379337		nlpC	putative lipoprotein	Putative or unknown function	TCGACGTCGAGGGGCATCCAATGCTCATTTCGGCCACTTAAGTAAAATCGT
214	Chr	1378846	P	+	SL1344_1277	STM1343	1378873	1379337		nlpC	putative lipoprotein	Putative or unknown function	AGTAAAATCGTTTCTTGAAAAGCAGGTAATTTCGACGCTAAATTAATACCA
215	Chr	1379421	S	+	SL1344_1278	STM1344	1379651	1380364	SL1344_1278-1279	ydiV	conserved hypothetical protein	Putative or unknown function	TTAACATATCGCCGGTTGAACTTATGACATCTGTTGTCATCATATATAATG
216	Chr	1384327	P	-	SL1344_1282	STM1348	1383453	1384286		ydiA	Hypothetical protein	Putative or unknown function	CATTTTATAAAATAAGCGACAAGTTATACGTTTCCCGTTACTTTTAATTTA
217	Chr	1403188	P	-	SL1344_1298	STM1364	1401973	1403091		ydiK	lipoprotein	Putative or unknown function	ATCACATTTTTTTCCTGTGCGCCCAACAGAATTACATGCAGAATCGGCCTG
218	Chr	1403170	S	+	SL1344_1299	STM1365	1403356	1406412	SL1344_1299-1300	ydiJ	conserved hypothetical FAD-binding protein	Putative or unknown function	AGAACGTTGGCGCGACGTGAACATGCAAACCACACCCTATAATGATGAGCA
219	Chr	1418419	P	-	SL1344_1312	STM1378	1416778	1418136		pykF	pyruvate kinase	Central intermediary metabolism	ACAGGGTTTTCATTTTCCTTTTTTGTAAATTTCAGCGTATAATGCGCGCCA
220	Chr	1428100	P	-	SL1344_1319	STM1385	1427285	1428037	SL1344_1319-1317	ttrB	tetrathionate reductase subunit B	Electron transport/energy metabolism	TGTGGTTAACCACAATAGAGCGCACCCCGCCTCGATTTTTACACTGTAAAT
221	Chr	1432856	P	-	SL1344_1324	STM1390	1432112	1432840		orf242	putative transcriptional regulator (SPI2)	Pathogenesis	TTATCACTACCTTAGTCTTCATTTGATCATGATATAGTAGAATCCCCTTAT
222	Chr	1433807	P, I	-	SL1344_1325	STM1391	1433019	1433657		ssrB	SPI2 TCS regulator (SPI2)	Pathogenesis	TAATTCACACATTAAAAGGCTGTTTAGGTCAAATAGGGCAGACTGAATTGG
223	Chr	1460370	S	+	SL1344_1358	STM1426	1460404	1461045		ribE	riboflavin synthase subunit alpha	Vitamins and Cofactors	TAACGGCGCATTGCTGGCAAGCTGTTTTTCCACCTGCTATTGTGCTGAACA
224	Chr	1460188	P	+	SL1344_1358	STM1426	1460404	1461045		ribE	riboflavin synthase subunit alpha	Vitamins and Cofactors	GGTATTGCTAACGCTAATAACTGACGCGCTTCACTGGTATACTTCTGCACG
225	Chr	1468103	P	-	SL1344_1364	STM1432	1466973	1467827		ydhO	cell wall-associated hydrolase	Cell surface/envelope	GAATTTTTTCGATAGTGGTGCTCATTGTCTCGCTTCCTTAAACTACTTTTA
226	Chr	1471827	S	+	SL1344_1371	STM1439	1471926	1472822		ydhF	putative oxidoreductase	Putative or unknown function	CAAAATGTACTGCGGCTTTGTCGCCAGCGTTTCTTGCGTAAAATACGCGCA
227	Chr	1476681	S	-	SL1344_1375	STM1443	1476301	1476537	SL1344_1375-1373	ydhI	inner membrane protein	Cell surface/envelope	CTCCTTATAATTAGCTTGCTAAGTTATTATGCTGATTTTAGAATAGTGTGC
228	Chr	1476693	P	+	SL1344_1376	STM1444	1476732	1477172		slyA	Virulence associated transcriptional regulator SlyA	Pathogenesis	AAATTTAGCAATACATTTGTTTTGAGAATACAAATACTGCACACTATTCTA
229	Chr	1477781	P	+	SL1344_1378	STM1446	1477959	1479080		ydhH	conserved hypothetical protein	Putative or unknown function	TATAGCTAAATTATATGGCATTTATGCAGTTAAGGTCATATCTTCTGCCGA
230	Chr	1493211	S	+	SL1344_1394	STM1462	1493233	1494273		ydgJ	hypothetical oxidoreductase	Putative or unknown function	TCAGCCTCTGTTCTGTAACAAGTTAATCATTTGATGCTACGTTGATGGTCA
231	Chr	1495375	P	-	SL1344_1395	STM1463	1494348	1495349		add	Adenosine deaminase	Nucleotide and nucleoside interconversions	GTTTTTGCAAAATTTCCAGAGCATTATCAATCTGTAGTATAATGGTGCGCA
232	Chr	1512225	S	-	SL1344_1408	STM1478	1511078	1512022		ydgH	putative exported protein	Putative or unknown function	ATCATTAAACCCCTGGCGCGATCAAGAAATTAACATTAAATTAACTTATTA
233	Chr	1512434	P	+	SL1344_1409	STM1479	1512549	1514078	SL1344_1409-1410	pntA	pyridine nucleotide transhydrogenase subunit-alpha	Electron transport/energy metabolism	TCTGTTTTTTGGCGCTAGATCACAGGCGTTATTTTCAGTAGGTTATAGAGA
234	Chr	1512172	S	+	SL1344_1409	STM1479	1512549	1514078	SL1344_1409-1410	pntA	pyridine nucleotide transhydrogenase subunit-alpha	Electron transport/energy metabolism	TTTTTCACGCATCGTGTCATGTATCCTATCTTTGATGATAACATTTGCCGA
235	Chr	1516709	P	-	SL1344_1411	STM1481	1515652	1516686		No Data	putative membrane protein	Putative or unknown function	TTTGATTTTAACCAGAACAGGTCGACCGACATCACATTATTATTCGTGTCG
236	Chr	1536316	P	-	SL1344_1429	STM1499	1533806	1536247	SL1344_1429-1425	dmsA1	putative dimethyl sulphoxide reductase subunit	Putative or unknown function	TCTTTGACATGGATTAATAATCCTTACTCCCAAAGGGGTAAACTCATTACA
237	Chr	1536832	S	-	SL1344_1430	STM1500	1536401	1536709		ynfD	putative exported protein	Putative or unknown function	CAAGGGATTTCGGGTTATCACAACCTGCCAGTATCATGCACAATAACGTCA
238	Chr	1545552	P	-	SL1344_1440	STM1510	1544840	1545526		ydfH	putative regulatory protein	Putative or unknown function	CAGAAACATGATCGGTATAGACCACCACGGAAAAGTGGTAGAGTATCCGGG
239	Chr	1546447	S	+	SL1344_1442	STM1512	1546541	1548583		dcp	dipeptidyl carboxypeptidase II	Protein folding, degradation and stabilization	GATCATCACACAGTTCCTCAACGCTTTTTGTGTTGTATTACCATAGCACGC
240	Chr	1552650	P	+	SL1344_1447	STM1517	1552682	1553584		ydeD	putative membrane protein	Putative or unknown function	CGGTAAAAAGAAAAGTCCTGTTATGGCGCACTGATTTCCGATAACTTACCT
241	Chr	1554812	P	-	SL1344_1450	STM1520	1554350	1554784	SL1344_1450-1448	marR	multiple antibiotic resistance protein MarR	Regulators	GGCCAATTCATTTAGTTGACTTATACTTGCCTGGGCAATAGTATCTGACGA
242	Chr	1555011	P	+	SL1344_1451	STM1521	1555043	1555708		marC	putative membrane protein	Putative or unknown function	GCACACTGGCGAAATGGCGCGCCTGGGCAATTTCACTTTATACTTCCGGTT
243	Chr	1556979	P	-	SL1344_1452	STM1522	1555755	1556945		ydeA	Probable sugar efflux transporter	Central intermediary metabolism	CAGGTCACAAAATGATTGTCTTTTCGCCAGTAAACGTTTTAAGATCGCGGT
244	Chr	1557956	P	-	SL1344_1453	STM1523	1557061	1557933		yneJ	putative regulatory protein	Putative or unknown function	ACCATCATGACGCCCTTTACCCTTTCTGAAAAATGAATAATATTAACCAGA
245	Chr	1561014	P	+	SL1344_1457	STM1527	1561039	1561953		No Data	putative membrane protein	Putative or unknown function	TGTATCACCAGAAGCTTGCAACCTTGATCTGGATCACGTTTAATGACAGTG
246	Chr	1577956	I	-	SL1344_1473	STM1544	1576636	1578126	SL1344_1473-1471	pqaA	PhoPQ-activated protein	Putative or unknown function	CTCCCCGACTACCGGGAGCAGATTTCAGGCACACCGCTAAAATATACCTTG
247	Chr	1584188	P	+	SL1344_1481	SL1481	1584297	1584629		No Data	hypothetical protein	Putative or unknown function	GTGATGTAACAACCGAAGTCAGCCTTGCAGATGGTGATATTATTTTACTTG
248	Chr	1601547	P	-	SL1344_1493	STM1563	1601090	1601521		osmC	osmotically inducible protein C	Stress responses	TACCTCCATCGGCATGGACAACGCAGATTAGCAGCATGGTCTATACTTTAT
249	Chr	1610585	P	+	SL1344_1502	STM1571	1610677	1611501		yddG	putative integral membrane protein	Putative or unknown function	AAAATGACACTGCATGGCATCGCCCTCGGAAAAAGTGCTATAAGTGGCAGT
250	Chr	1611582	P	+	SL1344_1503	STM1572	1611987	1613114		ompD	outer membrane protein	Cell surface/envelope	ATCGACCCGCTGTACCTTGACACTCTTCATAACACAACTACGCTTTTATCT
251	Chr	1615960	P	+	SL1344_1507	STM1576	1616096	1617448	SL1344_1507-1511	narU	nitrite extrusion protein	Anions/cations and iron carrying compounds	ATCTCCTCATCGCGCCGCGCTGGCCTGGTTTTTTATCTATTCTTTCACTCA
252	Chr	1616068	S	+	SL1344_1507	STM1576	1616096	1617448	SL1344_1507-1511	narU	nitrite extrusion protein	Anions/cations and iron carrying compounds	TTTGTGTTTTTCTTCAAATGATATGCGCATGTGAGGGGTAAAATGACACGA
253	Chr	1626134	P	-	SL1344_1513	STM1582	1625228	1626073		nhoA	N-hydroxyarylamine O-acetyltransferase	Central intermediary metabolism	TTTTTTCAAAAGTATCCAACGCTATTCCACGGATAGGGTATCCTGTTGCGC
254	Chr	1631158	P	-	SL1344_1517	STM1586	1629438	1630499		No Data	possible ATP-binding protein	Putative or unknown function	AGCGCTGAGAAGGGGCCGCGTAACACTTCAACGTCTTGTATGCTGTTAATA
255	Chr	1635172	P	+	SL1344_1521	STM1590	1635198	1635713	SL1344_1521-1522	yncA	putative acetyltransferase	Putative or unknown function	CTTGCGCTAATTCGTTGATTTATGCCGCCTTCAATAGTATTTCTAACACTA
256	Chr	1636435	P	-	SL1344_1523	STM1592	1636167	1636400		ydcY	conserved hypothetical protein	Putative or unknown function	GGCGGCGGCGAATTACCGCATCGGGCGACAATAACGCGTATAATAGGCGAA
257	Chr	1636599	P	+	SL1344_1524	STM1593	1636624	1637943	SL1344_1524-1526	srfA	putative virulence effector protein	Putative or unknown function	TTGCCTTTCTTCCGCCGTTTGCTTGCGTATAGACCCCGTAAAGTAGACGCG
258	Chr	1653135	P	+	SL1344_1536	STM1606	1653159	1654337		No Data	putative benzoate membrane transport protein	Putative or unknown function	CCATAGCGTATCACTTGTACGCTATAACGCACAATGCTACATTGACTGACT
259	Chr	1656836	S	-	SL1344_1539	STM1609	1655798	1656811	SL1344_1539-1538	tehA	tellurite resistance protein TehA	Transport and binding proteins	CGTAGCAAAGGTACTGGCGAAACAACCAGAAATTCCATAAAATGCATTTCA
260	Chr	1662230	P	+	SL1344_1546	STM1616	1662323	1662760	SL1344_1546-1549	No Data	putative phosphotransferase enzyme	Putative or unknown function	ATCCGACAATAAAATGGGGATAAGCAAAACGCTTATCCCCTGCAGAGAGCG
261	Chr	1668411	P	-	SL1344_1552	STM1622	1666680	1668335		mdoD/opgD	Glucans biosynthesis protein D precursor	Polysaccharide and LPS metabolism	AGGCGACCAACAATTGGATTATTAATGAATTTTGTCTAGAGTGAGCGGTCA
262	Chr	1675970	P	-	SL1344_1558	STM1628	1675676	1675951	SL1344_1558-1557	No Data	conserved hypothetical protein	Putative or unknown function	TGCGTAATTTTACAATTACATAAACATAAAATTCTGATAGTATACCCCCCT
263	Chr	1676281	S	+	SL1344_1559	STM1629	1676474	1676875		No Data	conserved hypothetical protein	Putative or unknown function	AGTTTTTATTTACTCACCAGGTGGTAATGAATAAAGGTTATGATATGCAGA
264	Chr	1679869	P	-	SL1344_1562	STM1632	1679493	1679837		No Data	inner membrane protein	Putative or unknown function	GAAAAAAATTCTACATCACATAGGCGCATGTATCGCGTATAATGGGCTCCG
265	Chr	1680392	P	+	SL1344_1563	STM1633	1680744	1681505	SL1344_1563-1567	No Data	putative periplasmic amino acid-binding protein	Putative or unknown function	GCTCAAAAAATGTATTTGACAAGAAAAGATAAGTCTTTATATTGGCCCTGG
266	Chr	1692352	S	-	SL1344_1571	STM1641	1688187	1692089	SL1344_1571-1570	hrpA	ATP-dependent helicase HrpA	DNA/RNA replication, recombination, and repair	ATTTCATCTGCGACGTGTTTTTCGCGCCATTGTTCAATAAAATAGTCAGTC
267	Chr	1692246	P	+	SL1344_1572	STM1642	1692290	1692895		acpD	Acyl carrier protein phosphodiesterase	Fatty acid/lipid metabolism	TTCGATATATTGCGCTATCCCTGCGACATATTTGTGAATAAAGTGTCAACA
268	Chr	1696685	P	-	SL1344_1576	STM1646	1694006	1696642	SL1344_1576-1573	ydbH	putative exported protein	Putative or unknown function	GCAACATGAACTATTAGGCTATGTACGGGCAATCATGCCAAAATAAAGAGA
269	Chr	1715373	P	-	SL1344_1595	STM1664	1714742	1715344		No Data	conserved hypothetical DNA-binding protein	Putative or unknown function	CAGTTCCGGGCTGATTGACGGTAACATAGAAGACATCGCATAATCCTGTAA
270	Chr	1715363	P	+	SL1344_1596	STM1665	1715388	1716074		No Data	conserved hypothetical protein	Putative or unknown function	GCCGTGGTCGATAAGTTGACTTTTTTGGTCATTGGTCGATATCATAGAATA
271	Chr	1724086	P	-	SL1344_1603	STM1673	1723821	1724057		No Data	outer membrane lipoprotein	Cell surface/envelope	CAATAGCCCTAATCATCCATCTTGCCGTTGCGGTATTCGGTAAAGTACATC
272	Chr	1724823	P	-	SL1344_1604	STM1674	1724186	1724776		No Data	putative transcriptional regulator	Putative or unknown function	TTGTTGCGAAATAGCGTCATCAGGATGTCCTTTATGATATTGTAGTAGCCA
273	Chr	1730583	S	+	SL1344_1610	STM1680	1730654	1731382		ycjI	murein peptide amidase A	Protein folding, degradation and stabilization	CTTCCGCCAGAAAGTTGATATCGCGCCATACAAGAGGGTAAATAGAAACCA
274	Chr	1732428	P	-	SL1344_1611	STM1681	1731357	1732322		ycjG	putative mandelate racemase / muconate lactonizing enzyme family protein	Putative or unknown function	ACGGTGACCGGGTTACCCTGGAAATGTACAGTCTGTGACATAATTATGTTC
275	Chr	1737669	P	-	SL1344_1616	STM1686	1737327	1737641	SL1344_1616-1614	pspE	bacteriophage shock protein E precursor	Transposon functions/phage	TAGCGAGTCTGGTCATAATATTTCGTTAAGCTCTGGCGTATAGTGTGTGCG
276	Chr	1751171	P	+	SL1344_1633	STM1702	1751199	1753133		rnb	exoribonuclease II	DNA/RNA interactions and degradation	ACTGAAAGAGCGCTTGCTGCGCCAGGCAGAATCGCGTAAAACTGTCAGCCG
277	Chr	1753300	P	+	SL1344_1634	STM1703	1753395	1755377		yciR	conserved hypothetical protein	Putative or unknown function	TTTTAGCTGGCGACTATGCTTTTTCCAGAATCTGGATTACATATGAATACA
278	Chr	1758228	P	-	SL1344_1639	STM1707	1757440	1758177	SL1344_1639-1638	pyrF	Orotidine 5'-phosphate decarboxylase	Purine/pyrimidine metabolism	TTGTCAATCGAACCTGTTAATTTCCCTGCGCCGCAGGTAGAATGCACGCCG
279	Chr	1759960	S	-	SL1344_1641	STM1709	1759544	1759852	SL1344_1641-1640	yciS	inner membrane protein	Cell surface/envelope	GAAAGCTGACAACGGTTGATTTTCTGACTATTGCCCTTAAATCATCTGATG
280	Chr	1766328	P	-	SL1344_1645	STM1713	1765260	1766234		cysB	cys regulon transcriptional activator	Regulators	ATTTTATCGCGCTGGCTATACAGTTCAGATATAAATGATATAGTGGTTATA
281	Chr	1769597	S	+	SL1344_1647	STM1715	1769645	1769896		yciN	conserved hypothetical protein	Putative or unknown function	AGTGAACGCAACATGACAAATCCATCAATTTCCTGTGAGAATATTTGCCCA
282	Chr	1771014	P	-	SL1344_1648	STM1716	1769938	1770984		sohB	putative protease	Putative or unknown function	GCATACGGATGAAGAGAGACTGACTTCGATGCCTGTTGTACACTGAGCGCA
283	Chr	1771091	S	-	SL1344_1648	STM1716	1769938	1770984		sohB	putative protease	Putative or unknown function	GCGCCTTTTTTTTCAATCAGACAGGGGCGATAACGCCGTAAAATGAACGTC
284	Chr	1771162	P	+	SL1344_1649	STM1717	1771222	1771983	SL1344_1649-1650	yciK	hypothetical oxidoreductase	Putative or unknown function	TCGCCCCTGTCTGATTGAAAAAAAAGGCGCTTTCAGGCATAAACCCGAAAA
285	Chr	1775159	P	-	SL1344_1653	STM1721	1774261	1775142		trpH	conserved hypothetical protein	Putative or unknown function	AATGTCAACACCTATTTCAGTATATTTGCCGGAACCGTTATGATGTACATG
286	Chr	1775005	P	+	SL1344_1654	STM1723	1775403	1776965	SL1344_1654-1658	trpE	anthranilate synthase component I	Amino acid/polyamine metabolism	GAAATTTCTTCTCTTGCCGCAGGAATCGCGGCTGTGGTGTCATGATCGGTA
287	Chr	1775060	S	+	SL1344_1654	STM1723	1775403	1776965	SL1344_1654-1658	trpE	anthranilate synthase component I	Amino acid/polyamine metabolism	CCAGCGTGCCGACTCGCATCTCTACCGCACGGTGTACTAATGTTTCTGGCG
288	Chr	1786120	P, I	+	SL1344_1665	STM1734	1786152	1786895	SL1344_1665-1666	yciC	putative membrane protein	Putative or unknown function	ACAACTGCTGATGCTGCCACTGTAGAGTTATCCAGGGTACAATTGCCCGCA
289	Chr	1788933	P	-	SL1344_1668	STM1737	1788113	1788841		tonB	TonB protein	Electron transport/energy metabolism	TGTTAAACATGCACATTTTGTGTGGTGTTTTTGTGCGATATCATCTTTTAA
290	Chr	1791191	P	+	SL1344_1671	STM1740	1791215	1791544		yciU	conserved hypothetical protein	Putative or unknown function	TTACCGAGCGATTGTTTTACTTCTTTAGTCCATTGCTGTAAAACGTGACCA
291	Chr	1799558	P	-	SL1344_1679	STM1748	1798857	1799504		ychE	putative membrane protein	Putative or unknown function	AGGCGTAGATAAGAGGTGAACTATGCGAATAAAAGGCGTATCTTCTGCGCG
292	Chr	1804027	S	+	SL1344_1682	STM1751	1804136	1804549		hns	DNA-binding protein (histone-like protein Hlp-II)	Regulators	GTGCGGTGCCTCAAGGAAAATTTAAGTTGAGATAATTAAAACGTGTGCTTA
293	Chr	1805726	S	-	SL1344_1683	STM1752	1804681	1805589		galU	UTP--glucose-1-phosphate uridylyltransferase subunit GalU	Polysaccharide and LPS metabolism	AGCGGAAATTGCTTTACCGGCCTTTCCCGACGAGTGTTACTATCTGCGGCA
294	Chr	1808148	S, I	-	SL1344_1685	STM1754	1806896	1807801	SL1344_1685-1684	ychK	conserved hypothetical protein	Putative or unknown function	AAACTAACATACCCTGTATTTTCTGCTTCTGACCAGGTATGTTCAAAAATA
295	Chr	1812073	P	-	SL1344_1688	STM1760	1810579	1812054		No Data	putative secreted protein	Putative or unknown function	AATAAGGATAGTTGTATGCGTTTTTCATCAATTTTCAAAATAATAATATTA
296	Chr	1812132	S	-	SL1344_1688	STM1760	1810579	1812054		No Data	putative secreted protein	Putative or unknown function	TGCGAGTTTTTTGTAAGCAGAAAAATGATGATGCAGCATATAATCACGCCA
297	Chr	1821048	P	+	SL1344_1694	STM1766	1821135	1822931	SL1344_1694-1695	narX	nitrate/nitrite sensor protein NarX	Regulators	CAGCGGCAATTAAGGAGTAACTCGTTATAGGTATGGGTATACTCCGCTGTA
298	Chr	1837859	S	+	SL1344_1711	STM1783	1837970	1838554		pth	Peptidyl-tRNA hydrolase	Translation/protein modification	CATTTAACAAAACTTTACAAATAACACACTGAACAGTTTACATTTTTAATA
299	Chr	1841236	P	-	SL1344_1713	STM1785	1839921	1841186		No Data	conserved hypothetical protein	Putative or unknown function	CATCGTTAAAAGAAGCATACTTCGTGATGATTTTTATATAAAATAGTGATG
300	Chr	1841440	S	-	SL1344_1713	STM1785	1839921	1841186		No Data	conserved hypothetical protein	Putative or unknown function	GAAACAATGTGAAGTGTGTGGGTATAGCTTATAGCGGTATATTTATACCCA
301	Chr	1841518	P	+	SL1344_1714	STM1786	1841681	1842799	SL1344_1714-1722	hydA	hydrogenase-1 small subunit	Electron transport/energy metabolism	ACCCACACACTTCACATTGTTTCTTATCGTTAATCCGATACGCTTTTTTCA
302	Chr	1854093	P	+	SL1344_1726	STM1798	1854121	1854855		ycgR	inner membrane protein	Cell surface/envelope	AATTTATTTATCGCTATTAAGTTCTTTCTACCGATGCCGATAACCCAACGA
303	Chr	1855621	P	+	SL1344_1728	STM1800	1855651	1856565		ycgQ	conserved hypothetical protein	Putative or unknown function	AAACGTCGCACAACGAGGGACATCGCCTAATATATGCGGCATGATATACAT
304	Chr	1868867	S, Alt	+	SL1344_1742	STM1814	1868940	1869647	SL1344_1742-1744	minC	Probable septum site-determining protein minC	Cell division	TTTTACTCTGAATTAACGGGATGGTGACTTGCCTCAATATAATACTGACTA
305	Chr	1872789	S	-	SL1344_1746	STM4311	1872138	1872596	SL1344_1746-1745	tnpA_6	transposase	Transposon functions/phage	TACGACGAGAACTGCGTGACGAAGCCCGTGGCAAAGTAGACAATAAAGCCT
306	Chr	1878013	P	-	SL1344_1750	STM1821	1876083	1877993		yoaA	putative ATP-dependent helicase	Putative or unknown function	CGTCACCTCTGTAACTGGCGTAAGCCTTTCTACCCTGACATAATCCCTGTG
307	Chr	1880893	P	+	SL1344_1755	STM1826	1880944	1882308		sdaA	L-serine deaminase 1	Amino acid/polyamine metabolism	TTCATGTGAATAGTTAAGCTGATGCCAGCGTTCCCTCTTACACTATGCGCA
308	Chr	1885987	P	+	SL1344_1759	STM1830	1886101	1887069	SL1344_1759-1761	manX	PTS system, mannose-specific IIAB component	Transport and binding proteins	ACGGATCTCCATCACACAAAATATTTTTTTCGATATCTAAAATAATTCACG
309	Chr	1885909	S	+	SL1344_1759	STM1830	1886101	1887069	SL1344_1759-1761	manX	PTS system, mannose-specific IIAB component	Transport and binding proteins	AAGATTTACCTTCCTTTGCAAAGAGATGTAACCAGGATATTTTACACTTCG
310	Chr	1885731	S	+	SL1344_1759	STM1830	1886101	1887069	SL1344_1759-1761	manX	PTS system, mannose-specific IIAB component	Transport and binding proteins	ATGCAGGCGGTAACGCAATAAACAAAGTAAGGCTATGGCAAGATATGCCAG
311	Chr	1889172	S	+	SL1344_1763	STM1834	1889712	1890278		yebN	putative membrane protein	Putative or unknown function	CTTTAAACAACGTGGCTTTTTCTTCGCCAATGTCTGGATAGAATATAACCG
312	Chr	1892922	P	-	SL1344_1765	STM1836	1891150	1892895		ftsI2	penicillin-binding protein 3	Murein and peptidoglycan metabolism	TAGCATTGTTTTTTCTGGTTTTTCCGGCCGTTTCCCGTTAAATCAATCACC
313	Chr	1893811	S	-	SL1344_1767	STM1838	1893337	1893480	SL1344_1767-1766	No Data	conserved hypothetical protein	Putative or unknown function	CATCACAAAAAGCGGTGCCGAAAATCGCTTTTCTTTTCTATTATTTTGATT
314	Chr	1893982	S	-	SL1344_1767	STM1838	1893337	1893480	SL1344_1767-1766	No Data	conserved hypothetical protein	Putative or unknown function	ACCTTACATAATATATGGCTTTATATGCAACATAGTTTTATATGTATAACA
315	Chr	1894752	S	-	SL1344_1769	STM1840	1894487	1894630	SL1344_1769-1768	yobG	Magnesium starvation stimulated gene	Anions/cations and iron carrying compounds	AATGATCAAACGCATTACTACCTCTTTTCTTTTTTAGTTAGAATAAGAGTA
316	Chr	1896150	S	-	SL1344_1771	STM1842	1895239	1896030		kdgR	transcriptional regulator KdgR	Regulators	TTTTGTAATAAGGGGAATTATGAGCTGAATAATAATGTTAGCATTAATACT
317	Chr	1896173	P	+	SL1344_1772	STM1843	1896206	1897579		No Data	MFS-type transporter	Transport and binding proteins	CGTTACAAATCTGCGACATAACAACTCAGTATTAATGCTAACATTATTATT
318	Chr	1898551	S	-	SL1344_1773	STM1844	1897627	1898508		htpX	heat shock protein	Protein folding, degradation and stabilization	TACCGCCTGGTGATGCTTGAAAATAGCCATAAGACCCATACGATGTGGGTA
319	Chr	1906118	P	+	SL1344_1779	STM1850	1906143	1907582		yebU	rRNA (cytosine-C(5)-)-methyltransferase RsmF	Translation/protein modification	ACCAGGCTCCGGCGTACTCGCGCCGGAGCGTTTTATGCTACACTGCGCGCC
320	Chr	1910881	P	+	SL1344_1785	STM1856	1910986	1911381		No Data	conserved hypothetical protein	Putative or unknown function	AATCAGTAACAATTGCAACACTATTCCAATCATAACGTAAACTATATGATA
321	Chr	1916477	P	-	SL1344_1792	SL1792	1916257	1916457		No Data	conserved hypothetical protein	Putative or unknown function	GCGCCGGGGCGGAGGCAGGAGGAGATAACTCGTTGTAATAGAATGTTTTTA
322	Chr	1917578	P, I	+	SL1344_1794	STM1863	1918122	1918280	SL1344_1794-1795	No Data	inner membrane protein	Putative or unknown function	GGTATCACTGCGCTTATTTCTGCTGTGTTAATCCATGCCATAATATATACA
323	Chr	1920613	S	+	SL1344_1799	STM1867	1920747	1920947		pagK	bacteriophage encoded pagK (phoPQ-activated protein)	Pathogenesis	TTTCACATGAATTAATTTACATTGGAAATAAAATATAATAGTGCTTATCAT
324	Chr	1922777	P, I	+	SL1344_1802A	N/A	1922868	1923041		No Data	conserved hypothetical protein	Putative or unknown function	TGGAAGATGAGTGCCTTGATTCAGGTGGTTCATACAATGAAAATGGAATTT
325	Chr	1927601	P	+	SL1344_1810	STM1876	1927622	1927852		holE	DNA polymerase III, theta subunit	DNA/RNA replication, recombination, and repair	ATCATCATTTCCATCTTGCCATTACCGCGGACTCTTAGTACCTTCTGGCGG
326	Chr	1927936	P	+	SL1344_1811	STM1877	1927960	1928616		No Data	conserved hypothetical protein	Putative or unknown function	ACGACTACATTATAAGGCGATTCTTAACCTATGCTTTTTAGAATGGCTGTA
327	Chr	1931574	P	-	SL1344_1813	STM1879	1929373	1931424		ptrB	oligopeptidase	Protein folding, degradation and stabilization	AAGTAACATGTTTCGCTTGCATCATGCGTGTCTTTTGCCACCCTTATAGGA
328	Chr	1937109	P	-	SL1344_1819	STM1885	1935189	1937000	SL1344_1819-1818	edd	6-phosphogluconate dehydratase	Central intermediary metabolism	TTAAGCCTCGTGTGGATTCACCTGCGAGGCTTTTTTTATTACACTGCCTGA
329	Chr	1938768	P	-	SL1344_1820	STM1886	1937235	1938710		zwf	glucose 6-phosphate dehydrogenase	Central intermediary metabolism	AAAGGCGTTTACGGTTTCCGTAATCTCGTAAAAGCAGTACAGTGCTGTGTA
330	Chr	1938993	P	+	SL1344_1821	STM1887	1939052	1939921		hexR	putative hex-regulon repressor	Putative or unknown function	TTTTTTAGCCATTTTGCCCCCTTCGGCAGTCGCCAGGAGTAATATCTAACA
331	Chr	1938858	S	+	SL1344_1821	STM1887	1939052	1939921		yebK	putative hex-regulon repressor	Putative or unknown function	TAAACGCCTTTTCATGGATGAACCGGCGTTTGATTGGCAATATAATCGGCA
332	Chr	1944902	P	+	SL1344_1826	STM1893	1945006	1945761	SL1344_1826-1827	znuB	high-affinity zinc uptake system ATP-binding protein	Anions/cations and iron carrying compounds	CGTCGGCAGCCTGGGTTGCACTCCCCCAAAGCGCGGCGGATAATGCTGCGA
333	Chr	1948286	P, Alt	-	SL1344_1829	STM1895	1947641	1948252	SL1344_1829-1828	ruvA	Holliday junction DNA helicase ruvA	DNA/RNA replication, recombination, and repair	TAACGTGTTTTTCATCTGGATAAACATCCAGTCTTTTTTTATGATAGTGCA
334	Chr	1948070	P	+	SL1344_1830	SL1830	1948585	1949567		No Data	conserved hypothetical protein (pseudogene)	Putative or unknown function	GTTTTAATTAGCTCTTTAAATAGCGTGCGCTCTTGCTTATTGTTAAATCCG
335	Chr	1950217	I	+	SL1344_1832	STM1897	1950194	1950793		yebB	conserved hypothetical protein	Putative or unknown function	TATTTTAGGTAATAATGGAACGTGAACATGAAAAAACATTATTCTGTCCAA
336	Chr	1954641	P	-	SL1344_1836	STM1901	1952678	1954450	SL1344_1836-1833	aspS	Aspartyl-tRNA synthetase	Translation/protein modification	TTTGTGAGCATACGCAATACCCGCGTGAAAAACCCGGGTACAGTCAGTATG
337	Chr	1954546	S	-	SL1344_1836	STM1901	1952678	1954450	SL1344_1836-1833	aspS	Aspartyl-tRNA synthetase	Translation/protein modification	ATGCTGGATTGACTCTTATCGTGCGGCAGAATTTCCAGTATAATAGCCGCC
338	Chr	1956619	P	+	SL1344_1840	STM1905	1956645	1957388	SL1344_1840-1841	yecO	conserved hypothetical protein	Putative or unknown function	TATATGCCCTGGGAGTTGGTTTTCTCCCTGTATTAGCGCACAATATGCGCC
339	Chr	1960052	P	+	SL1344_1844	STM1909	1960164	1961897		argS	Arginyl-tRNA synthetase	Translation/protein modification	TGGGCGTTTATTGAATGCTTATGCAGATTATTGTTGCGTATATTTCAGGCG
340	Chr	1960107	P, Alt	+	SL1344_1844	STM1909	1960164	1961897		argS	Arginyl-tRNA synthetase	Translation/protein modification	GCCGCGCGCGCAATGCTGACGCCAACGGGCATTTGCAGTATACTCCCGCCC
341	Chr	1962064	P	+	SL1344_1845	STM1910	1962086	1963957		No Data	penicillin-binding protein	Cell surface/envelope	TGGAACATCTTTTACCTGTGCTGGCGCTGACCGCCCCGTATCATTAGGCGG
342	Chr	1969025	P	-	SL1344_1849	STM1914	1967850	1969001	SL1344_1849-1846	flhB	flagellar biosynthetic protein FlhB	Chemotaxis and motility	CCGCTTACTCTGCCTATTGGCGTAAAGCGGTTCTGGCATCATTCTCTCTTA
343	Chr	1980165	P	-	SL1344_1860	STM1925	1979284	1979634	SL1344_1860-1859	flhD	Transcriptional activator flhD	Regulators	GTTAAATCAAATGAGCTTATTTTTAACAGCGGAGGGCGTATGCTGTGACGA
344	Chr	1979991	S	-	SL1344_1860	STM1925	1979284	1979634	SL1344_1860-1859	flhD	Transcriptional activator flhD	Regulators	AAAAGAATTTGGTGTTGACGTACCCCTATTCAGCAGTGTGGAATAGAAAAA
345	Chr	1979930	S	-	SL1344_1860	STM1925	1979284	1979634	SL1344_1860-1859	flhD	Transcriptional activator flhD	Regulators	GGTTATTAATTAAACAAAGTAAAAGCCATGCTGATGGTTTTATCGTAAGTA
346	Chr	1979837	S	-	SL1344_1860	STM1925	1979284	1979634	SL1344_1860-1859	flhD	Transcriptional activator flhD	Regulators	CGCCGTCCCGCTCCGTTGTATGTCACGAAGCTGACGAGTAGAGTTGCGTCG
347	Chr	1983251	S	-	SL1344_1863	STM1929	1982263	1983066	SL1344_1863-1862	otsB	trehalose phosphatase	Stress responses	GGTTCGCGGCTGAATCCTTCTGACAACAGTTATCTTCGACCATTATAAGCA
348	Chr	1984429	P	-	SL1344_1864	STM1931	1983700	1984257		araH	intracellular protease/amidase	Vitamins and Cofactors	ATTGTTTCAGATCATGGGTTAAGCCTTTCAAGTATGTTAATTTCAATAAAA
349	Chr	1984651	P	+	SL1344_1865	STM1932	1984808	1985311		ftnB	ferritin-like protein	Anions/cations and iron carrying compounds	ATTGCATTTAAGGATTTTCTTATTTTTATTGACGCGCTATTCTCATTACCG
350	Chr	1986360	P	+	SL1344_1867	STM1934	1986384	1986719		No Data	putative lipoprotein	Putative or unknown function	GTAAGTTATTCCAGCCATTGACAGTGCAAGACACGAGGTAGCATGGTCTGA
351	Chr	1986920	P	+	SL1344_1868	STM1935	1986959	1987456		ftnA	ferritin	Anions/cations and iron carrying compounds	TTAATATTTTACCTTTTGCAAATAATAAAATAACAAATTATAGTGGCGCCA
352	Chr	1990147	S	-	SL1344_1871	STM1938	1989254	1989919		yecA	conserved hypothetical protein	Putative or unknown function	ATTTGAGAGGGCGGTTTTATCTGTCCGCGGCGGTGGTATAAGTTAGCATGA
353	Chr	1990611	S	-	SL1344_1872	STM1939	1990157	1990462		No Data	Conserved hypothetical protein	Putative or unknown function	AAGGCAACCGTGCGCGTGGATATAAAGAGAGTATCCCTGTAAACTGTGTCT
354	Chr	1998026	P	-	SL1344_1879	STM1950	1997226	1997948		sdiA	cell-division regulatory protein	Cell division	CAAAAAGTGTAATGCCGCTCAAGTATTCTACGTTTCGTCCGATATTTCTTA
355	Chr	2003064	P	-	SL1344_1885	STM1956	2002315	2003034	SL1344_1885-1884	fliA	RNA polymerase sigma transcription factor for flagellar operon	Chemotaxis and motility	ATAGCCTTATTCCTTCGATAGAACCCTCTGTAGAAACGGATAATCATGCCG
356	Chr	2003052	S	-	SL1344_1885	STM1956	2002315	2003034	SL1344_1885-1884	fliA	RNA polymerase sigma transcription factor for flagellar operon	Chemotaxis and motility	CTTCGATAGAACCCTCTGTAGAAACGGATAATCATGCCGATAACTCATTTA
357	Chr	2009202	P	+	SL1344_1892	STM1963	2009235	2010719		amyA	cytoplasmic alpha-amylase	Polysaccharide and LPS metabolism	GGCGCCTCATAATATTTTCCCGTCTCGTATGAAAATTCTTCCATACTCCAG
358	Chr	2011331	P	+	SL1344_1894	STM1965	2011370	2012575	SL1344_1894-1895	yedE	putative membrane protein	Putative or unknown function	TTACCGCTTATTAGGTGTAGGCAAATTCTGTGATCGGTGTAGTATGCGCAC
359	Chr	2012935	P	+	SL1344_1896	STM1967	2013070	2013456		No Data	Putative 50s Ribosomal protein	Putative or unknown function	CAGACAAGGTCGTCTTGTGCGCCGTGGCATAAATCTATTATATAACGTATA
360	Chr	2013915	P	-	SL1344_1897	STM1968	2013576	2013890		fliE	flagellar hook-basal body complex protein FliE	Chemotaxis and motility	ATCGTTATTTAACGCCTTTATCTTATTGACAAACTGGTAATCTCTGCTGCG
361	Chr	2014021	P	+	SL1344_1898	STM1969	2014107	2015789	SL1344_1898-1903	fliF	flagellar basal-body M-ring protein	Chemotaxis and motility	ACCTCGGTTTTTAGCGCATAGAAAAATTCGAAACCACAAATAATGAGACCG
362	Chr	2020597	P	+	SL1344_1904	STM1975	2020631	2021098	SL1344_1904-1910	fliL	flagella biosynthesis protein	Chemotaxis and motility	TCCGCGTCTTTTCCACGCTTTGTCGTGGACAGGACACGGGATAATCAGCCA
363	Chr	2033351	P	-	SL1344_1920	STM1992	2031897	2033327	SL1344_1920-1919	dcm	DNA-cytosine methyltransferase	DNA/RNA replication, recombination, and repair	ACCCCTGTCGCTGAAACGTAAACCGCGTCATTTTATGTTAGTCTGTCGGCA
364	Chr	2039175	P	-	SL1344_1926	STM1998	2038731	2039150	SL1344_1926-1925	umuD	DNA repair protein	DNA/RNA replication, recombination, and repair	GTAGCGACTCCGGTATCTTGCGCGCATGTTCAAATAACACTACTGTATATA
365	Chr	2039819	P	-	SL1344_1927A	N/A	2039416	2039658		No Data	conserved hypothetical protein	Putative or unknown function	TGCGTACAAAAATGCTACTTTTTTCTCGTGTTATTAGATAAGTTAATGTTA
366	Chr	2039809	S	-	SL1344_1927A	N/A	2039416	2039658		No Data	conserved hypothetical protein	Putative or unknown function	AATGCTACTTTTTTCTCGTGTTATTAGATAAGTTAATGTTAAATAAGAATA
367	Chr	2039908	S	-	SL1344_1927A	N/A	2039416	2039658		No Data	conserved hypothetical protein	Putative or unknown function	AAGTCAATAAAGGAGATGGTTTTGTTTAAAAAATAGTCTATCATGGTGAGA
368	Chr	2040382	S	-	SL1344_1927B	N/A	2040069	2040290		No Data	DNA invertase pin protein	Putative or unknown function	AGTTTAATAAATTGGAAGATTTTTGTATGAAGATTTGCTACCGTATTTTCG
369	Chr	2061523	P, I	-	SL1344_1952	N/A	2060954	2061304	SL1344_1952-1938	sb56	Salmonella phage ST64B protein	Transposon functions/phage	ATTTACGATCATCCGTTTACTCCCTTCATCAGAAAGGGGATATTAATCGCG
370	Chr	2062398	P	-	SL1344_1954	N/A	2061887	2062306	SL1344_1954-1953	sb54	Salmonella phage ST64B protein	Transposon functions/phage	CGCAGTAAATGCGCTTCACACGCGCGACTTCTGAACACAGAACCTTTCAGG
371	Chr	2072168	P	-	SL1344_1966	SL1966	2071339	2072049		No Data	predicted bacteriophage protein	Putative or unknown function	CATTGTGCAAATCAACTTGCGCAAGTTTGCTGTATGAAATAACATGCGATA
372	Chr	2071952	S	+	SL1344_1967	SL1967	2072244	2072939		No Data	predicted bacteriophage protein	Putative or unknown function	TCCTTCTGCAGTGGTGGCGGTCAAATCGCCGAATCACTAAGCTGATATCTG
373	Chr	2079892	P	+	SL1344_1977	STM2001	2080066	2080863		yeeI	conserved hypothetical protein	Putative or unknown function	ACGTGATTTTCATCACTATAAGAAAATCACGTAAGTGCTTGAATAGTGGCG
374	Chr	2083979	P	+	SL1344_1982	STM2007	2084162	2086330	SL1344_1982-1983	No Data	putative exported protein	Putative or unknown function	CAGGTGCTCACTCCCGCATCTTGAGGTTTATTGGGTATATAATCGTTAATA
375	Chr	2111978	S	-	SL1344_2011	STM2035	2110137	2111516	SL1344_2011-1992	cbiA	cobyrinic acid a,c-diamide synthase	Anions/cations and iron carrying compounds	AATTGTCATAGCGCAACAAAATAATAAAATTTAGGGCATAAACTGCACCAG
376	Chr	2113116	P	-	SL1344_2012	STM2036	2112114	2112878		pocR	pdu/cob regulatory protein PocR	Regulators	ACTGATCAAAACGTCTCCCAGCAATGGGAGACTTTTGATATTGTCATTGTA
377	Chr	2114389	P	-	SL1344_2013	STM2037	2113242	2114036		pduF	putative propanediol diffusion facilitator	Putative or unknown function	TGCTTTTATAACTTATTGATAAATTACATTTAATTTATTATTGTCTATATG
378	Chr	2114535	P	+	SL1344_2014	STM2038	2114561	2114845	SL1344_2014-2033	pduA	putative propanediol utilization protein	Putative or unknown function	AACAGCAAGTCAGCCATTCTTTTTCCTCGCATCTTCTTATAGTCCCAACTA
379	Chr	2131869	P	-	SL1344_2035	STM2059	2131363	2131698		yeeX	conserved hypothetical protein	Putative or unknown function	TGTTGCTGCTTCGATTCAGCAAAGATTAAGAGTATGATACTAATATAAGGA
380	Chr	2141813	P	+	SL1344_2044	STM2067	2141976	2143406		sbcB	exodeoxyribonuclease I	DNA/RNA interactions and degradation	ATCAGAATCAGTAATTTCAGATGGACCGGAATATGGTTTACCATAGAGGGA
381	Chr	2141766	S	+	SL1344_2044	STM2067	2141976	2143406		sbcB	exodeoxyribonuclease I	DNA/RNA interactions and degradation	GAGATCCCGGCCAGATTGCCCCTGGCCTAAATTCCATACAGTACTAAATCA
382	Chr	2205972	P, Alt	-	SL1344_2099	STM2122	2205274	2205915		udk	Uridine kinase	Nucleotide and nucleoside interconversions	GGCATAGCGCCGGACTGGTATCGCGCTGCTGAAATCCCTATAATTGCCGCG
383	Chr	2206164	P	-	SL1344_2099	STM2122	2205274	2205915		udk	Uridine kinase	Nucleotide and nucleoside interconversions	CGGAATACCGGACGCGTCAGTTTACTCTGTGATTATGCTAGTATAAACGCG
384	Chr	2210092	P	-	SL1344_2101	STM2124	2209204	2210073		alkA	DNA-3-methyladenine glycosidase II	DNA/RNA replication, recombination, and repair	TGGAATATGAAAGCAAGGCGTTACGTGCGATTAGCGTTTATGCTGAAAGGT
385	Chr	2227324	P	+	SL1344_2112	STM2136	2227400	2228761		yegQ	putative protease	Putative or unknown function	CAATGGTGTAAGGTGGTTTACTCCCCTCTCCCACGGCGCTACAATGCCCGC
386	Chr	2228946	P	+	SL1344_2113	STM2137	2229212	2230258		No Data	predicted bacteriophage protein	Putative or unknown function	TGGCCTGCGTAATCTCCCTTACGCAGGCTTATTTTTTGCGTATAATCCATA
387	Chr	2231409	S	+	SL1344_2117	STM2140	2231729	2232628		yegS	conserved hypothetical protein	Putative or unknown function	AAAGTATGTTTGGTAATAAATATCAGGTTTTTATCTGATATTATGGTGTTT
388	Chr	2239935	P	+	SL1344_2125	STM2148	2239971	2240285		No Data	conserved hypothetical protein	Putative or unknown function	ATAACAAAATAGCGCTTGTCAGATACGCCACCAGCAGAAATGATACACACG
389	Chr	2247422	P	+	SL1344_2132	STM2155	2247455	2249488		metG	Methionyl-tRNA synthetase	Translation/protein modification	AAATGCCCTTATCGATTGGCGCAGTAATTACCATTTTGGTACTATCAAAGC
390	Chr	2249723	P	+	SL1344_2133	STM2156	2249729	2250187		yehR	putative lipoprotein	Putative or unknown function	ATTAATTCATTGAAATTATTTTAAAAACCCAATCATTATATAAAATGGAGT
391	Chr	2251441	P	-	SL1344_2135	STM2157	2250946	2251413		yehS	conserved hypothetical protein	Putative or unknown function	TGAAAAGTTTAAAAGAGGCGATTGGCCTGTAAAAGACTGTTAGAATATCGT
392	Chr	2264261	P	-	SL1344_2146	STM2168	2263241	2264149		pbpG	D-alanyl-D-alanine endopeptidase	Murein and peptidoglycan metabolism	CTGACGATTCTTCTGTAGCGGCAACGCTGGCGTGCCGCTATGATGCCACTG
393	Chr	2276856	P	+	SL1344_2160	STM2183	2276882	2277766		cdd	cytidine deaminase	Nucleotide and nucleoside interconversions	ATGAGATTTAGATCACATATTAAGACATAGCAGGCCCGTAAACTACGGTTC
394	Chr	2279040	P	+	SL1344_2163	STM2186	2279109	2280350	SL1344_2163-2164	No Data	putative oxidoreductase	Putative or unknown function	TTGTGAATTCTTTCACAGAATACCCTTCTTTCAATGCTTAGGCTGGCGGTA
395	Chr	2286904	P	-	SL1344_2168	STM2191	2285831	2286853		galS	mgl repressor and galactose ultrainduction factor	Electron transport/energy metabolism	CTGTGATGTTTCTCACGCAGCCCTGGGCAGGGTGCTGACAAAATAGCCGCC
396	Chr	2289036	S	-	SL1344_2170	STM2193	2288160	2288828	SL1344_2170-2169	folE	GTP cyclohydrolase I	Vitamins and Cofactors	GTGAGTAACTTTCACTTCCGTAATACATAAACATGCTTCATCATTTAAATA
397	Chr	2291807	P	-	SL1344_2173	STM2196	2290398	2291765	SL1344_2173-2172	sdaA	putative L-serine dehydratase	Putative or unknown function	CAGACACAAAAGGTATCACTTTTGATATGCCAACTGTGCGAGGATGTTATT
398	Chr	2291963	P	+	SL1344_2174	STM2197	2291982	2292869	SL1344_2174-2175	No Data	putative hydrolase	Putative or unknown function	CTGTGATAGCACGAGATTCCACGCCGCAAAAGAGCCATTATAATACCCGTA
399	Chr	2299171	P	-	SL1344_2178	STM2201	2298263	2299126		yeiE	putative transcriptional regulator	Putative or unknown function	AGGTTACGGTGATCTGGTTTAAAAATAAAATTGATTATATATTTATAATTA
400	Chr	2299230	P	+	SL1344_2179	STM2202	2299247	2300296		yeiH	putative membrane protein	Putative or unknown function	ATATATAATCAATTTTATTTTTAAACCAGATCACCGTAACCTTATTGTCCA
401	Chr	2305167	P	-	SL1344_2183	STM2206	2303940	2305070	SL1344_2183-2181	fruF	pts system, fructose-specific IIA/FPR component	Transport and binding proteins	AAACCGGTAACTTTTCTTGCGTGCTGAAGCAGAAAGATCCAGACTTCTTGA
402	Chr	2307480	P	-	SL1344_2186	STM2209	2307352	2307474		No Data	hypothetical protein	Putative or unknown function	ATCGATATAACCAGTGTGAATGTATTGTTATTTTCCTTTAAAATACTCGAA
403	Chr	2308411	P	-	SL1344_2187	SL2187	2307862	2308116		No Data	conserved hypothetical protein	Putative or unknown function	TGATTTCGTTCGCTCTTGGCATCGAGGAGATCCTGTTGTAGAGATTATCTA
404	Chr	2308138	S	-	SL1344_2187	SL2187	2307862	2308116		No Data	conserved hypothetical protein	Putative or unknown function	ACATTTTAAATCTGGATTTTTCTTTGGACAAATTCTGTTATCTTTCATTTG
405	Chr	2308405	P	+	SL1344_2188	STM2211	2308440	2309012		yeiP	elongation factor p-like protein	Translation/protein modification	AAGTGACAATTCCACTTGCCTGGATGGCCCGGCGCGAGTAGTTTTACGCGA
406	Chr	2308193	S	+	SL1344_2188	STM2211	2308440	2309012		yeiP	elongation factor p-like protein	Translation/protein modification	GAAAGATAACAGAATTTGTCCAAAGAAAAATCCAGATTTAAAATGTGGACG
407	Chr	2311148	S	+	SL1344_2191	STM2214	2311374	2311946		spr	outer membrane lipoprotein	Cell surface/envelope	TGCGCTTAATTTGACCCGTGCTGATAGTTCACTTTTTGTATCATAAATTCT
408	Chr	2322240	P	+	SL1344_2200	STM2223	2322264	2324024		yejH	putative helicase	Putative or unknown function	GCGGGCTAACTATATCCCTCAAGGGAAATGATTCATGGCATACTATTCCCG
409	Chr	2326335	P	-	SL1344_2203	STM2226	2325190	2326197	SL1344_2203-2202	yejK	nucleoid-asociated protein	Putative or unknown function	TTGTGGCATAAATCAAAATCTGTTTGTTCATGAAAGGGCAACATATTACCG
410	Chr	2326057	S	+	SL1344_2204	STM2227	2326377	2326604	SL1344_2204-2205	yejL	conserved hypothetical protein	Putative or unknown function	GCCAGTTCACTCTCTTCATTAAACAGGCCATACGCCTTATTCTTGGCGCTA
411	Chr	2344271	S	+	SL1344_2222	STM2246	2344418	2345065		narP	nitrate/nitrite response regulator protein NarP	Anaerobic metabolism	CAGGGAGTATTCTGTTTTCTCTCACAACGGGTTGTTTTATCCTTTCTATCG
412	Chr	2357442	P	-	SL1344_2231	STM2261	2356870	2357361	SL1344_2231-2224	napF	ferredoxin-type protein NapF	Electron transport/energy metabolism	ACCTCTATCGGGGTATGCATCTCTTACACATCCTGAAATATCTTATTTACA
413	Chr	2357729	P	+	SL1344_2232	STM2262	2357775	2358269		eco	Ecotin precursor	Protein folding, degradation and stabilization	ATATGAGTAAATACAGATTAATAGATAATATGAATGTGTTAATCTGTTGTC
414	Chr	2363088	P	-	SL1344_2236	STM2266	2361992	2363044		apbE	thiamine biosynthesis lipoprotein ApbE	Vitamins and Cofactors	AGGGCCTGCGGGCCCTTTTTTCATGCCTTATTCCGGCGTACAAATACGACG
415	Chr	2364867	P	+	SL1344_2238	STM2269	2365024	2367693	SL1344_2238-2239	yojN	putative two-component system sensor kinase	Putative or unknown function	TAGCAAATAATTTCTTGATATTTAGTGCTAAACATTTATAAGTAGTCTTTA
416	Chr	2377467	I	+	SL1344_2244	STM2275	2377254	2377949		No Data	putative transcriptional regulator	Putative or unknown function	GTAAAACACCAATTCGTGAAGCTTTTATTTGGCTGAGCTATAATGAAAACT
417	Chr	2384212	P	+	SL1344_2250	STM2281	2384252	2385130		No Data	putative transcriptional regulator	Putative or unknown function	AATGTGATGTATTCGATAGAATCACAGTATAAACAAGTGCACTCTATTAGA
418	Chr	2401520	S	+	SL1344_2266	STM2297	2401669	2402826	SL1344_2266-2272	yfbE	UDP-4-amino-4-deoxy-L-arabinose--oxoglutarate aminotransferase	Polysaccharide and LPS metabolism	AAACATAAAAACAGCTTTTGGGCATGCATAAAATGCCTTAAACTTTCGGCG
419	Chr	2415035	P	-	SL1344_2278	STM2309	2413342	2415012	SL1344_2278-2274	menD	2-succinyl-5-enolpyruvyl-6-hydroxy-3-cyclohexene-1-carboxylate synthase	Electron transport/energy metabolism	TCCCGACCCATATCAATAATCCATTTTTGCAGCTCTTTATACTTAGTCCCA
420	Chr	2437343	S	-	SL1344_2297	STM2328	2436771	2437214	SL1344_2297-2285	nuoA	NADH dehydrogenase I chain A	Electron transport/energy metabolism	GGAACTTTTGTTAAAGTTGACAAAAGGTTATAGAAAGGAGTAAAAAACCAC
421	Chr	2438943	S	-	SL1344_2299	STM2330	2437841	2438779		lrhA	NADH dehydrogenase operon transcriptional regulator	Electron transport/energy metabolism	CACATTCTCTTTGATATATCCCGATCAGTTGCATTTGGTATTATATCAGTA
422	Chr	2439491	S	-	SL1344_2299	STM2330	2437841	2438779		lrhA	NADH dehydrogenase operon transcriptional regulator	Electron transport/energy metabolism	TTTCTATTTTTTTCTGTATGTATGGTGTTTTGTTCTATATGATTGCGCGTA
423	Chr	2439205	S	+	SL1344_2300	STM2331	2439711	2440925		yfbQ	putative aminotransferase	Putative or unknown function	GCCCCCGTTTCGGATCATTATCTTAACCTAAAACCGCTATATTTATAAGTA
424	Chr	2445474	S	-	SL1344_2305	STM2336	2444860	2445315		No Data	conserved hypothetical protein	Putative or unknown function	TTGAGTCTATGCCATTTTGCGTATTTTTCAGCCAATGGCATACTATGTGTA
425	Chr	2456724	P	-	SL1344_2315	STM2346	2456124	2456678		No Data	conserved hypothetical protein	Putative or unknown function	TGATCAAAGTATCATTGCGCAGGTTGCAATTAACTCGTAATTTACCTCACA
426	Chr	2458808	P	+	SL1344_2319	STM2350	2458902	2459795		yfcH	sugar nucleotide epimerase	Polysaccharide and LPS metabolism	TAACAGTACGAAAGCGTAACGCGGTAGCATACATCATGTATGATGTAGAGG
427	Chr	2463114	S	-	SL1344_2323	STM2354	2462207	2462989	SL1344_2323-2320	hisJ	histidine-binding periplasmic protein	Amino acid/polyamine metabolism	TTTTGGTGCATAAGCCGTTGCGGAACAGGCGCATAAATGCATACTTAATCG
428	Chr	2465749	I	-	SL1344_2326	STM2357	2464894	2466300		No Data	putative amino acid permease	Putative or unknown function	GTTTTCGCGATCGTGCTGTTTATTTGCGCGGGCGGGGTTATGATCTACTCG
429	Chr	2475333	P	-	SL1344_2333	STM2364	2474406	2475080		dedD	DedD protein	Cell division	TGTTGCCGAAACGCGGGCGCGTGCTTGCGGTGATTGGTATGCTGCATGATA
430	Chr	2484196	P	-	SL1344_2342	STM2373	2483667	2484041		No Data	predicted bacteriophage protein	Putative or unknown function	TGCACGATGCCAGTCTTGGCTTTTTGGTTCCATTCTGTAATCCTAAGAAGA
431	Chr	2494342	P	-	SL1344_2354	STM2385	2493378	2494310	SL1344_2354-2350	yfcB	conserved hypothetical protein	Putative or unknown function	CCGCCGCGTCAATGCTGATTTATCCCTGTCTTCGTGGCAAACTAGCCGCCG
432	Chr	2495742	S	-	SL1344_2356	STM2387	2495127	2495612		sixA	phosphohistidine phosphatase	Translation/protein modification	ATGCCTCCTTAGTGGCGAAATAATAATCAAGGATTGACTATACTTACGCCA
433	Chr	2502310	P	-	SL1344_2361	STM2392	2501479	2502234		vacJ	VacJ lipoprotein precursor	Cell surface/envelope	ATGAGATCGCGCATATAGACATCGTTTGACGTGCTGTTAAAATCGCTCACA
434	Chr	2509602	P	-	SL1344_2366	STM2398	2508217	2509410	SL1344_2366-2364	pgtC	phosphoglycerate transport regulatory protein PgtC precursor	Regulators	ATGTGCGGATATTAACAAATTTGCTGCCAGTGATCTGATACGCTTTATTGA
435	Chr	2511814	P	-	SL1344_2368	STM2400	2511513	2511755		No Data	conserved hypothetical protein	Putative or unknown function	TGAGATAAATGTTATGGAAATGACGGGCTGATAAGGTTTATCTTAAAGGAG
436	Chr	2519793	S	+	SL1344_2374	STM2406	2519936	2520934		No Data	putative ion-channel protein	Putative or unknown function	TAGGGGTTTTGCATGACAGCTTTCCTTCTGACGTTGATATTATGTTGAGTA
437	Chr	2522887	S	-	SL1344_2376	STM2408	2521435	2522676		mntH	Probable manganese transport protein mntH	Anions/cations and iron carrying compounds	CTATAATAAGGACCTGTGACGAGATTCAAAATTAGTGATCTGTAATACACT
438	Chr	2522986	P	+	SL1344_2377	STM2409	2523019	2524221		nupC	nucleoside permease NupC	Purine/pyrimidine metabolism	AGTGTGTGTTGGATCTCGTTTTCTTTACGGCTGTTGCATAGAATGTGCACG
439	Chr	2526520	P	-	SL1344_2378	STM2410	2524274	2526463		yfeA	putative membrane protein	Putative or unknown function	TGTTTGCCGCTGCTTTTGCGGTCAATATGAGCTTTTGTTAGATTGCTTCAT
440	Chr	2529465	S	-	SL1344_2381	STM2415	2527879	2529294		gltX	Glutamyl-tRNA synthetase	Translation/protein modification	TGAGTCAACGCATTTTCTAAAGTTTTTGTTTGTTCGTCGTAAAATTAAACA
441	Chr	2535438	P	-	SL1344_2387	STM2424	2534486	2535412		yfeR	putative transcriptional regulator	Putative or unknown function	AGTCGGTGCAGCTATTTTGCGTTTTTCGCTTTGAGAAATAAAATTGATTTA
442	Chr	2535482	P	+	SL1344_2388	STM2425	2535502	2536500		yfeH	putative membrane protein	Putative or unknown function	ATGCAATAAATCAATTTTATTTCTCAAAGCGAAAAACGCAAAATAGCTGCA
443	Chr	2539777	S	+	SL1344_2392	STM2429	2540022	2540783		cysZ	putative sulfate transport protein CysZ	Putative or unknown function	CCAGTAAAGCGATTATGGCGATCGCGCCAACAATGATTAATATCAGACGCA
444	Chr	2540842	P	+	SL1344_2393	STM2430	2540947	2541918		cysK	cysteine synthase A	Amino acid/polyamine metabolism	TGTATAAATAAGAGATGGCTTATGCTGTCTCTTATTCCATACTGATAACCA
445	Chr	2540915	S	+	SL1344_2393	STM2430	2540947	2541918		cysK	cysteine synthase A	Amino acid/polyamine metabolism	TATGCGAAATCCTTACTTCCCCATATCTGGCTGGAAGGTATGCTGGGAAGG
446	Chr	2546188	P	+	SL1344_2399	STM2436	2546219	2547511	SL1344_2399-2402	ptsJ	putative transcriptional regulator	Putative or unknown function	AAATTTTCCTCTCGCTGGACAGCAGGCTACCGCCTCATTATCATTGTCATA
447	Chr	2550332	P	-	SL1344_2403	STM2440	2549367	2550278		cysM	cysteine synthase B	Amino acid/polyamine metabolism	GCGTGAAGAGGAACTTGCTCTGGCGCAATCGGCCTGATAGGTTAATTTGTA
448	Chr	2557940	P	+	SL1344_2413	STM2450	2558049	2558918	SL1344_2413-2415	amiA	N-acetylmuramoyl-L-alanine amidase I	Murein and peptidoglycan metabolism	ATTCAGCCAATATCTGACGCGATGTAGCGGAAAAAATGGCATAATGGCGAT
449	Chr	2560251	P	+	SL1344_2416	STM2453	2560299	2561576		No Data	conserved hypothetical protein	Putative or unknown function	TCATTGTAGATAAAGAATTCGGATAACCGCCCGCTGCCGTTATCATTAGTA
450	Chr	2576589	P	-	SL1344_2433	STM2470	2576231	2576566	SL1344_2433-2424	eutS	putative ethanolamine utilization protein EutS	Putative or unknown function	CTTGCCGAATTTTGTTATTTACTCCGACAAAAAATTGCCACGATGACGGCA
451	Chr	2580110	P	-	SL1344_2435	STM2472	2577695	2579974	SL1344_2435-2434	maeB	NADP-dependent malate dehydrogenase (decarboxylating)	Central intermediary metabolism	CATAGCAGACAGGCATGGTATTGCTGGTATAAGCAGGTAACATGACCGTTA
452	Chr	2580022	S	-	SL1344_2435	STM2472	2577695	2579974	SL1344_2435-2434	maeB	NADP-dependent malate dehydrogenase (decarboxylating)	Central intermediary metabolism	TTTGCAGACCTTCAAAGTTTGTGTTGCGCAGTACGGTGATAATGTGCGGCG
453	Chr	2589334	P	-	SL1344_2442	STM2479	2587331	2589292		aegA	putative oxidoreductase	Putative or unknown function	GGGCAGATGAACATTGCCGACCCCGCCTTCGTCAGTTAATAACAATGCTCA
454	Chr	2589335	P	+	SL1344_2443	STM2480	2589478	2591178		narQ	nitrate/nitrite sensor protein NarQ	Regulators	CGATTCATGGCGTCCTTCTGTTTTGGTTGCAAAAACCTTATTCTTTATATG
455	Chr	2591273	P	+	SL1344_2444	STM2481	2591363	2594476		acrD	putative efflux pump	Putative or unknown function	TTGGCACAAAAAGTATGCTGTAAAAGCGCATGATAATTTACATTATCTCCT
456	Chr	2599533	I	-	SL1344_2449	STM2486	2598826	2599689	SL1344_2449-2448	ypfJ	Putative neutral zinc metallopeptidase	Putative or unknown function	GCGGCATCATTCTGTTGGTGGTGGTGTTGGTCGCAGGGTACTATGGGGTGG
457	Chr	2600760	P, I	-	SL1344_2450	STM2487	2599820	2600533		purC	phosphoribosylaminoimidazole-succinocarboxamide synthase	Purine/pyrimidine metabolism	TAACCGCAGCAGCTTGCAGTTTATCGATCCTAAGGGGCATACTCTGACGCA
458	Chr	2603314	P	+	SL1344_2454	STM2491	2603355	2603825		bcp	bacterioferritin comigratory protein	Anions/cations and iron carrying compounds	CCTTTAAAGCACTATGTACAGAACTCAATGCGCAAGGCAGTATAAACGTCG
459	Chr	2610746	P	+	SL1344_2462	STM2499	2610774	2611826		purM	Phosphoribosylformylglycinamidine cyclo-ligase	Purine/pyrimidine metabolism	GGGCGCAGACCACGCTCGCAAACGTTTGCTTTCCCTGTTAGAATTGCGCCG
460	Chr	2618608	P	-	SL1344_2466	STM2503	2616301	2618514		No Data	putative membrane protein	Putative or unknown function	ATTGACTTAAATCAAATGTTACTTTTGTTTAATAATTACAATCGATGACTA
461	Chr	2618694	S	-	SL1344_2466	STM2503	2616301	2618514		No Data	putative membrane protein	Putative or unknown function	AAGATAATTTTAGTATTTACATTAATAATAAATTAATGATAACAAAGAATA
462	Chr	2623668	P	-	SL1344_2472	STM2511	2622168	2623634		guaB	inosine-5'-monophosphate dehydrogenase	Purine/pyrimidine metabolism	TTGCAAAAAAATGTAGATGCAACCGATTACGTTCTGTATAATGCCGCGGCA
463	Chr	2631929	P	-	SL1344_2474	STM2513	2625306	2631425		shdA	host colonisation factor (ShdA)	Pathogenesis	CCGTCTCCCTTCTGCAACCCGGCATCTGGCGCTACGTATATACTCTAAATA
464	Chr	2650935	P, I	-	SL1344_2481	STM2519	2649173	2650645	SL1344_2481-2480	engA	GTP-binding protein engA	Translation/protein modification	AGCGATTTGCTGCACCGTTTGCTGACCTCCCCGGTGCTGTATAATGGTGAT
465	Chr	2653927	P	-	SL1344_2484	STM2522	2652587	2653861	SL1344_2484-2482	hisS	Histidyl-tRNA synthetase	Translation/protein modification	AAATAAGAACGTGATGGGAAGCGGCGCGCTTCCCGTGTATGATTGAACCCG
466	Chr	2663119	S	-	SL1344_2492	STM2530	2660629	2663007	SL1344_2492-2489	No Data	dimethyl sulfoxide reductase	Electron transport/energy metabolism	ACGTTAACAACTCTTCAGAATAAATTATGAATTTCATTTAATTTAAAGTTA
467	Chr	2682060	S	+	SL1344_2508	STM2546	2682152	2682955		suhB	extragenic suppressor protein SuhB	Central intermediary metabolism	CACAATTCGAATGTTTTGCAGCATTGTCTTTCTTCAGCTAAAGATTATTCT
468	Chr	2684091	P	+	SL1344_2510	STM2548	2684160	2685203		asrA	anaerobic sulfite reductase subunit A	Anaerobic metabolism	ACCATTTTTTCCCGTTAGCGAAGGCGGTGGATTAGCGCTAGCGTAACAGTA
469	Chr	2684028	S	+	SL1344_2510	STM2548	2684160	2685203		asrA	anaerobic sulfite reductase subunit A	Anaerobic metabolism	GCGCGACGCTGTATATATGCATATTTTATGATTAAGAATATATTTATTATA
470	Chr	2692938	P	+	SL1344_2518	STM2556	2692976	2694166		hmpA	flavohemoprotein (haemoglobin-like protein)	Stress responses	AGCAGAGAAGATCCATTTACAATGCAAGGGTATTTTTATAAGATGCATTTG
471	Chr	2696182	P	+	SL1344_2520	STM2558	2696253	2697584		cadB	probable cadaverine/lysine antiporter	Amino acid/polyamine metabolism	TTCACTTTTTCTTTAGGACTTATCTCAACCCATTCGTTAATCTTGTCGACA
472	Chr	2704156	P, I	-	SL1344_2525	STM2563	2703125	2703889	SL1344_2525-2524	yfhG	putative membrane protein	Putative or unknown function	CTATTCCAACGCGGTGCACTATGGCGCTGAATCCGGTAACATTTGTATCCG
473	Chr	2704361	S	-	SL1344_2525	STM2563	2703125	2703889	SL1344_2525-2524	yfhG	putative membrane protein	Putative or unknown function	TGATTGAGCAATTGCTTGATTACAACCGGAAACTGGTAGACAGTGCCACAG
474	Chr	2715210	P	-	SL1344_2533	STM2571	2714296	2715189	SL1344_2533-2532	No Data	putative phophosugar binding protein	Putative or unknown function	CACTCGCCTGGGGGAATATTCTATTCCATCATGGACGCTTATTATGAATTA
475	Chr	2715100	P	+	SL1344_2534	STM2572	2715305	2716153		yfhH	putative transcriptional regulator	Putative or unknown function	TCAGGCAGAGTGGCTTTTACCGCTTCCGCTACCAGCGTATCCTGTTCATTA
476	Chr	2718602	P	-	SL1344_2536	STM2574	2717131	2718327		No Data	putative transmembrane transport protein	Putative or unknown function	TTTGTTAGCGTGTCGTTGCAAAATAATGCCTGCTTTTGTTAATTTAATTCC
477	Chr	2720973	P, I	-	SL1344_2540	STM2578	2720158	2720890	SL1344_2540-2539	pdxJ	pyridoxine 5'-phosphate synthase	Vitamins and Cofactors	GTGCCGCTAAACGCTTTACCCGTATGGCATTAAAGCCGTATCTTGGGGGAA
478	Chr	2726672	S	-	SL1344_2545	STM2583	2724489	2726288	SL1344_2545-2544	lepA	GTP-binding protein LepA	Translation/protein modification	TTTCATGCGCTTTTTCAATCTATATGTCAATACCAAGCTATCATTATTACA
479	Chr	2726687	P	+	SL1344_2546	STM2584	2726717	2728186		gogB	leucine rich hypothetical protein	Putative or unknown function	GGCTAGGTTCTAAATCTTGCCTGAATGAAAATAAATGTAATAATGATAGCT
480	Chr	2770532	P	+	SL1344_2596	STM2629	2770636	2770791		No Data	predicted bacteriophage protein (fragment)	Putative or unknown function	TTTAATTCCGCAAAGGTTGACTGAAAAGTAAAATGATGCTTTACTTATTCC
481	Chr	2780568	P	-	SL1344_2604	STM2640	2779841	2780416		rpoE	RNA polymerase sigma-E factor (sigma-24)	Transcription factors	TCTGTACAGATAGTGCGTTGTTCAGCATCTGTAGACTTATAATGGAAGATA
482	Chr	2780633	S	-	SL1344_2604	STM2640	2779841	2780416		rpoE	RNA polymerase sigma-E factor (sigma-24)	Transcription factors	GCGTCGGATTTTGTAGTGAAATAAAGATGCTGTTAGGTTACTCTGCAAACG
483	Chr	2780494	S	-	SL1344_2604	STM2640	2779841	2780416		rpoE	RNA polymerase sigma-E factor (sigma-24)	Transcription factors	CAAAAACAAATGCGTAACGGAACTTTACGAAACATAGACACTCTAACCTGT
484	Chr	2785633	P	-	SL1344_2608	STM2644	2784668	2785567		yfiE	LysR-family transcriptional regulator	Regulators	AGCATCGGTGTCACTTGTCATCTCCTCTGTTTTAGCAGACAGTACCCGATA
485	Chr	2812153	P, I	-	SL1344_2627	STM2669	2810757	2811824		tyrA	chorismate mutase/prephenate dehydrogenase	Amino acid/polyamine metabolism	AGAGATGGAACAGGCGGGACTACGTCCTTCGCTGATGGTAGATTGCAGTCA
486	Chr	2817811	S	-	SL1344_2633	SL2633	2816803	2817648	SL1344_2633-2631	No Data	putative repressor protein	Putative or unknown function	TCATGGTTACAAGCGCGTTGAACTGACCAGCGTCTAGCAATACAGTTTGAT
487	Chr	2833497	S	-	SL1344_2654	STM2681	2832775	2833365		grpE	heat shock protein GrpE (heat shock protein b25.3) (hsp24)	Protein folding, degradation and stabilization	GAGTGCGGTGGGATGACGCGGATGCCCCACAATGCCGATACACTTGAAATG
488	Chr	2836145	P	+	SL1344_2657	STM2685	2836262	2836600		smpA	small protein A	Putative or unknown function	AGAACTGCTGGCGGCGTAAACTTTTTTATCTCCCGAAGGTCTGAGTTCACA
489	Chr	2837561	S	-	SL1344_2659	STM2687	2837046	2837522	SL1344_2659-2658	yfjG	conserved hypothetical protein	Putative or unknown function	TGCAAAAATCTATCTTAGCATGAGTTGGGCTATGCACGCACAATTAAGGCA
490	Chr	2837525	S	+	SL1344_2660	STM2688	2837672	2838154		smpB	SsrA (tmRNA)-binding protein	Translation/protein modification	CTGAGGCATAGCAATTCCCATCAACATAAATCGTGTAAATAATACCACTTA
491	Chr	2855864	P	-	SL1344_2665	STM2694	2855616	2855834		No Data	putative positive regulator of late gene transcription	Putative or unknown function	GAAATTGAATGATTGGTTCTTAATATTGAATAATGATGTATCATTATTGCG
492	Chr	2862969	P	-	SL1344_2672	STM2701	2861298	2862470	SL1344_2672-2666	No Data	phage tail sheath-like protein	Transposon functions/phage	AAGTTATTTTTGTCACGGTAATGATCCTTTTATATGTACATAATTCATTTA
493	Chr	2862877	P	+	SL1344_2674	SL2674	2863004	2863726		SopE	invasion-associated secreted protein	Pathogenesis	AAGGACTTTTTTTGAAAGTTTCTGGAAAATAAAAATAGTACTATTTGTAGC
494	Chr	2881126	S	-	SL1344_2700	SL2700	2880885	2881073	SL1344_2700-2699	No Data	predicted bacteriophage protein	Putative or unknown function	ACAGATAAAAAGAGTTTTACATTTCTAACTTTCTAATATACTGTAATTATA
495	Chr	2881495	P, I	-	SL1344_2700	SL2700	2880885	2881073	SL1344_2700-2699	No Data	predicted bacteriophage protein	Putative or unknown function	TACCAGATATTAACGCCATGAATGAGAAGGAACTGCAGTATTATCTCCACA
496	Chr	2885555	P	-	SL1344_2705	SL2705	2885312	2885506	SL1344_2705-2701	No Data	hypothetical bacteriophage protein	Putative or unknown function	TTCGTTATTTTTCATGTCTTTTCCTTTCTGGCTGTGTGGAAATACCAGAAT
497	Chr	2886760	P	+	SL1344_2708	SL2708	2886920	2887495	SL1344_2708-2710	CI	bacteriophage repressor protein cI	Transposon functions/phage	CTTTGGGTACTCGAATTGAAATCTCAGTGCTCATAGTGCAGTATCTCTCGG
498	Chr	2890037	P	+	SL1344_2712	SL2712	2890073	2891269		No Data	bacteriophage integrase	Transposon functions/phage	AAATCCAGTGTTTATTGGTATACGTTTTGGTATACGGTAGGATGTATACCT
499	Chr	2902895	P	+	SL1344_2726	STM2742	2903009	2904202		No Data	conserved hypothetical protein	Putative or unknown function	TTATATACGTGTATCCATTATTAGTAGGTAAATTCATGTATATTGGCTACC
500	Chr	2911316	S	-	SL1344_2732	STM2748	2910939	2911229		No Data	putative transcriptional regulator	Putative or unknown function	TAAATCACGCAATTCTTGAATATTGCTCTAAATGTAATCAAAATTCAAGTA
501	Chr	2911354	P	+	SL1344_2733	STM2749	2911390	2911674		No Data	Transcriptional regulator for maltose metabolism	Regulators	CTATTCATGTATTACTTGAATTTTGATTACATTTAGAGCAATATTCAAGAA
502	Chr	2914983	P	+	SL1344_2738	STM2754	2915026	2916177		No Data	putative hexulose 6 phosphate synthase	Putative or unknown function	AATAGTCAACAAGTATTTCAAAAAAGTCCCAAGCAAATTATAATGCTGGAG
503	Chr	2920141	S	+	SL1344_2743	STM2759	2920209	2921888		No Data	putative solute-binding protein	Putative or unknown function	CAAAGACGAAAGTTATTTCCGGTTTTCGCTTAAAACCGGAAAATTTATGAG
504	Chr	2924020	P	+	SL1344_2745	STM2761	2924046	2925920		No Data	inner membrane protein	Putative or unknown function	AGATAATGTGTACTGTTTCCATTTCACCGCACTTGAGTTTAAAATACCAAG
505	Chr	2923881	S	+	SL1344_2745	STM2761	2924046	2925920		No Data	inner membrane protein	Putative or unknown function	GTGATGGGCGGGGAATATATATTGAGCAGGTATACGGGTATACTGATTGAA
506	Chr	2927554	S	-	SL1344_2746	STM2762	2926180	2927463		No Data	inner membrane protein	Putative or unknown function	ATCTTATACAAAGTTGGTACGCCTACCGTAATTCAGTTTAAAATGATAAAG
507	Chr	2933054	P	-	SL1344_2752	STM2767	2930996	2932978	SL1344_2752-2751	No Data	putative DNA/RNA helicase	Putative or unknown function	AACGAAGCTGCAAAGTGTTTTTTTTCTGTGTAAAGAGTATGATTCAGAACA
508	Chr	2950477	S	+	SL1344_2764	STM2781	2950949	2951878		virK	virulence protein	Pathogenesis	CCATATATTTTCTCCCAGAGACAGCAACACAGTGCATGATAAAATTTATCA
509	Chr	2952028	S	+	SL1344_2765	STM2782	2952171	2953067		mig-14	putative transcriptional regulator	Putative or unknown function	TGAATAGCGCGGCATTAAACCGTCGCTTTCACTCATGTTATGATCAACATC
510	Chr	2966958	P	+	SL1344_2778	STM2794	2967028	2967705		ygaE	putative transcriptional regulator	Putative or unknown function	AATAGGTACTGTCCCCATTATGTCTCGCTGGAAAAAACTGATAAGGTGGCA
511	Chr	2968204	P	-	SL1344_2779	STM2795	2967727	2968176		ygaU	conserved hypothetical protein	Putative or unknown function	TAAGCGCCGCTTATCAGGATAACCTCATTCCCTCTGCTACACTTTTCTTTG
512	Chr	2968481	P	-	SL1344_2780	STM2796	2968276	2968434		yqaE	conserved hypothetical protein	Putative or unknown function	AGCGCGGCGCGCGACTGGCAGGCTCAGGTAAACTGACTATGCTTAGAGATA
513	Chr	2968592	P	+	SL1344_2781	STM2797	2968677	2968916	SL1344_2781-2782	No Data	putative transcriptional regulator	Putative or unknown function	TTTACGCTCTTTACGCTGGCATTAGGTTGATGTTTATTTTAGAATTAACTA
514	Chr	2973678	P	-	SL1344_2787	STM2803	2972307	2973641		No Data	putative transcriptional regulator	Putative or unknown function	ATGTTTCTCCTCGTGTTGATGACGAGCACTGTAGCACTATAATGGTCTGTA
515	Chr	2973709	P	+	SL1344_2788	STM2804	2973730	2974161	SL1344_2788-2789	No Data	conserved hypothetical protein	Putative or unknown function	TAAAAATATGGCTCTCTTTTACAGACCATTATAGTGCTACAGTGCTCGTCA
516	Chr	2977813	I	+	SL1344_2794	STM2809	2978527	2979729	SL1344_2794-2796	proV	glycine betaine/l-proline transport ATP-binding protein	Amino acid/polyamine metabolism	TGATTCGTTTAATCATTCGCGATGAAGCGGTTCACGGTTATTATATTGGCT
517	Chr	2978465	S	+	SL1344_2794	STM2809	2978527	2979729	SL1344_2794-2796	proV	glycine betaine/l-proline transport ATP-binding protein	Amino acid/polyamine metabolism	AGAAGCAAATTCAGGGTTGTCTCAGATTCTGAGTATGTTAGGGTAGAAAAA
518	Chr	2983276	P	+	SL1344_2798	STM2813	2983697	2984227	SL1344_2798-2800	emrR	Transcriptional repressor of emrRAB multidrug resistance operon, MarR family	Regulators	TTAAGCTCCTTAGGGTGTTAAGGAGCTCCCCAGTCTGTTAAGGTTATGCTA
519	Chr	2983673	S	+	SL1344_2798	STM2813	2983697	2984227	SL1344_2798-2800	emrR	Transcriptional repressor of emrRAB multidrug resistance operon, MarR family	Regulators	TGTATTAATAATACATTTACTTTATTTGTCACTGTCGTTACTATATCGGCT
520	Chr	2993764	S	-	SL1344_2806	STM2826	2993527	2993712		csrA	carbon storage regulator	Regulators	TACACCTAAGGTGTTTGTCATCGCTTACTTTTTGGCGTTATATGATGGATA
521	Chr	2996818	S	-	SL1344_2807	STM2827	2993947	2996577		alaS	Alanyl-tRNA synthetase	Translation/protein modification	ATCGCGGGTATCTGATGGACAATATCCAGCAAATATGGCGAAATTTTGCAG
522	Chr	3003996	P, Alt, I	+	SL1344_2817	STM2837	3004213	3004986	SL1344_2817-2818	srlR	glucitol operon repressor	Regulators	TGTGATCTTTCCCCATGATTCGCTCGCGCAGAATGCACTATCATTGGCGCT
523	Chr	3007793	P	-	SL1344_2819	STM2839	3005941	3007461		ygaA	putative sigma-54-dependent transriptional regulator	Putative or unknown function	TCACTGCGCAGGTTTTGCACAAACTCACGGCTAAACTTATGATCGACGGTA
524	Chr	3012669	P	-	SL1344_2822	STM2842	3010313	3012553		hypF	hydrogenase maturation protein	Electron transport/energy metabolism	ACGGCATCGCTGCTTTTCTGATTTCTGCGATTGCGCGTAGAATACGCCACA
525	Chr	3022565	P, I	+	SL1344_2835	STM2855	3022799	3023672	SL1344_2835-2837	hypB	hydrogenase nickel incorporation protein HypB	Anaerobic metabolism	TTTGATCTGGTATGCCGCGGCACGATAGCAGAAGGTTGTAAACTGCACCTC
526	Chr	3024672	P, I	+	SL1344_2838	STM2858	3025052	3026062		hypE	hydrogenase isoenzymes formation protein HypE	Anaerobic metabolism	TTGATCTACTGCAAGGCGTGGTCATGCTGGTTGAGCAGAAAATAGCGGCCC
527	Chr	3026069	P	+	SL1344_2839	STM2859	3026281	3028359		fhlA	transcriptional activator of the formate hydrogenlyase system	Regulators	CCCTTGATTTGCCACACGCCGAACCATTACCTCGTATATGCTAGCAGCCTG
528	Chr	3035878	P	-	SL1344_2847	STM2867	3034683	3035570	SL1344_2847-2845	hilC	AraC-family transcriptional regulator (SPI1)	Pathogenesis	CAATTGACTGGTGAACCCCCATTGCTGGCGATTTGTGATAAGGTATGGTGT
529	Chr	3038978	P, I	-	SL1344_2853	STM2873	3038651	3038893	SL1344_2853-2848	prgI	type III secretion system apparatus (SPI1)	Pathogenesis	TTTGCGATCGAATTAAAAGATGACTGGCTCAAGGGGCGCTCATTTCAGTAC
530	Chr	3040362	S	-	SL1344_2854	STM2874	3038918	3040096		prgH	type III secretion apparatus component (SPI1)	Pathogenesis	TATTATCCCTTTGTTGATGTTATTTTAATGTTCCTTACTGGTATCCTACTG
531	Chr	3040377	P	+	SL1344_2855	STM2875	3040412	3041341		hilD	AraC-family transcriptional regulator (SPI1)	Pathogenesis	ACGCTAATAAAGAGCATTTACAACTCAGATTTTTTCAGTAGGATACCAGTA
532	Chr	3040222	S	+	SL1344_2855	STM2875	3040412	3041341		hilD	AraC-family transcriptional regulator (SPI1)	Pathogenesis	TAGAATGAAAAGTGAGAAATAAAATCAATTTATTCTGTATAATGCGTCTCA
533	Chr	3042084	P	+	SL1344_2856	STM2876	3042432	3044093	SL1344_2856-2857	hilA	SPI1 regulator (SPI1)	Pathogenesis	GATATAATAAGCAGCATTTACACCCCAAAAAAATGCAGTAAGATAGCTACA
534	Chr	3054030	P	-	SL1344_2865	STM2886	3053474	3053971	SL1344_2865-2860	sicA/spaT	type III secretion-associated chaperone (SPI1)	Pathogenesis	TTGGGCGTTTTTTGAATGTTCACTAACCACCGTCGGGGTTTAATAACTGCA
535	Chr	3066639	P	-	SL1344_2878	STM2899	3065858	3066508	SL1344_2878-2866	invF	AraC-family regulatory protein (SPI1)	Pathogenesis	CATAATGATTGCATCAGGATTTTGCCACCCGCTCCCGGTATTGTTTACATA
536	Chr	3067150	S	-	SL1344_2878	STM2899	3065858	3066508	SL1344_2878-2866	invF	AraC-family regulatory protein (SPI1)	Pathogenesis	ATTGCGCTATTTTTTGATGCGGAATTATCAGCGTTATGGTTTGATAATGAT
537	Chr	3066644	S	+	SL1344_2879	STM2900	3066965	3067408		invH	outer membrane lipoprotein (SPI1)	Pathogenesis	TGCGTATTTAGCATAGTTGTCAGCACCAGTTAAAAATCATTTTAATATGTA
538	Chr	3069389	P	-	SL1344_2882	STM2903	3068893	3069219		No Data	salmonella pathogenicity island 1 protein (SPI1)	Pathogenesis	GCGTTTACTCACTTAGTTGCGTGTCCACTATTGCTGAGTAAGATCAGAAGG
539	Chr	3069300	S	-	SL1344_2882	STM2903	3068893	3069219		No Data	salmonella pathogenicity island 1 protein (SPI1)	Pathogenesis	CTGGTGATGAAGGTGGCATATGGGAGGATGTATATCCTACACTTTCATCCG
540	Chr	3069745	S	+	SL1344_2884	STM2904	3069908	3070198	SL1344_2884-2885	No Data	salmonella pathogenicity island 1 protein (SPI1)	Pathogenesis	AAAAAGAGAATCATGGATATATTTAGCAAACTCCCTGATGATACGTAATCA
541	Chr	3072421	P	+	SL1344_2888	STM2909	3072897	3075422		mutS	DNA mismatch repair protein	DNA/RNA replication, recombination, and repair	AATTGCCTGGCAGCTTGCCTTGTTTCGTCAATATTTGGAAAATCGAACACA
542	Chr	3072654	S	+	SL1344_2888	STM2909	3072897	3075422		mutS	DNA mismatch repair protein	DNA/RNA replication, recombination, and repair	TTCGAAAACGATTTTTCCAGAGCGACTGAGTGCAGGCTTAACATTGATACT
543	Chr	3077145	P	+	SL1344_2891	STM2912	3077172	3078083		No Data	possible LysR-family transcriptional regulator	Putative or unknown function	CCGTCCGGAGAAAGCCAGATAAGTCCGCGCTTCAACGATATACTGTCAAAA
544	Chr	3091494	P, I	-	SL1344_2905	STM2926	3090419	3091045		pcm	Protein-L-isoaspartate O-methyltransferase	Translation/protein modification	TTGTCGTTTCCGGTATTAACGCGGGTCCGAATCTGGGCGATGATGTGATCT
545	Chr	3092212	P, I	-	SL1344_2906	STM2927	3091039	3091800		surE	Acid phosphatase surE	Stress responses	AACGCAGTTTTTGGTTGTCGGCGGCGCGTAGCGCGTTGTTTAATCAAATTG
546	Chr	3092144	S, I	-	SL1344_2906	STM2927	3091039	3091800		surE	Acid phosphatase surE	Stress responses	AAACCAGACTTTAATCAAGTTGTTGACGGCGATGCGCTACAATTAGCGGGG
547	Chr	3094363	S	-	SL1344_2910	STM2931	3094035	3094346	SL1344_2910-2907	ftsB	Cell division protein ftsB homolog	Cell division	ATCCCGTCCTGAATGTGGAGTCACAGAGGACGTTATGGGATGATGATGCCG
548	Chr	3108739	P	-	SL1344_2923	STM2944	3106052	3108715	SL1344_2923-2916	ygcB	conserved hypothetical protein	Putative or unknown function	TTGTGAGGTATATCAACAAAAAAGACCATTAAAAAGGCGTAGAGTGCTTTT
549	Chr	3109049	P	+	SL1344_2924	STM2945	3109160	3110113		sopD	possible secreted protein	Pathogenesis	TTATCGTCACCACAAAGGATTACCAACCATAAATGTGCTGTATTAATAATG
550	Chr	3114920	P	+	SL1344_2928	STM2949	3114946	3115308		ptpS	6-pyruvoyl tetrahydrobiopterin synthase	Vitamins and Cofactors	GAATGGTTTTAGTTAATGATAAAAAATGCGCTTTCCGGTACCCTACGGCGG
551	Chr	3121058	P, I	-	SL1344_2931	STM2952	3118827	3120125		eno	Enolase	Central intermediary metabolism	AATTCCGGGCCTGTTGAAATCTCAGGGGCTTGATGATTATATTTGTAAACG
552	Chr	3121896	P	-	SL1344_2932	STM2953	3120208	3121845		pyrG	CTP synthase	Purine/pyrimidine metabolism	GAGGAATAATGAAAGTTTGTGGCGTAGGTCATGTTCGGGTATACTGCTTTC
553	Chr	3122289	S	-	SL1344_2932	STM2953	3120208	3121845		pyrG	CTP synthase	Purine/pyrimidine metabolism	GTGATGTTCGAGGCGCGGCAGGCGGTTGTTGATCAGGCTAAACTGGAAGAG
554	Chr	3137017	P, I	-	SL1344_2944	STM2963	3136539	3136988		No Data	conserved hypothetical protein	Putative or unknown function	TGACAATGAAAGGGTTGAGTTTACGGCGGCGTCCCGGCAGGATGAGACTCA
555	Chr	3139315	P	+	SL1344_2948	STM2968	3139344	3140192		yqcD	conserved hypothetical protein	Putative or unknown function	AGTTCGTCCACCAGTTTCTCTCTTCATAAAAGCCAGGATACACTTGGCGCA
556	Chr	3148218	P	+	SL1344_2955	fucP	3148334	3149650	SL1344_2955-2959	fucP	L-fucose permease	Transport and binding proteins	AATGTGACCGCCATCATATTAAAAGGCCTTTTTTATTTGAAAATGACTCCA
557	Chr	3156723	P	-	SL1344_2962	STM2982	3155734	3156651		gcvA	regulatory protein for glycine cleavage pathway	Regulators	CACTATAGGTATTTGCTGGTAGAACCTCAACGGACAATTTATAATGTCTCA
558	Chr	3159233	P	+	SL1344_2966	STM2986	3159339	3160253		No Data	putative membrane protein	Putative or unknown function	TTGATTTTTATCAGCTATCACAATGAAATTACAATGTTAGAATCCATGTTA
559	Chr	3161201	S	-	SL1344_2967	STM2987	3160305	3161111		ygdL	conserved hypothetical protein	Putative or unknown function	GCCGGGCGCCGGTAACGTGTTTAGCGGCTGATTGTGGTATTCTGCGACAAC
560	Chr	3164170	P	+	SL1344_2970	STM2992	3164304	3165635		argA	Amino-acid acetyltransferase	Regulators	ATTGACCGGAAACTTTAGCGAATGACGCATAATCTGTCATCTATAAAAGGG
561	Chr	3171312	P, I	-	SL1344_2972	STM2994	3167570	3171115	SL1344_2972-2971	recB	exonuclease V subunit	DNA/RNA replication, recombination, and repair	GATTTCGATCGGGGTAATATGCGCTTTGACTCGCGTGATAAAATCATCGCT
562	Chr	3174365	P, I	-	SL1344_2973	STM2995	3171108	3173996		ptr	protease III precursor (pitrilysin)	Protein folding, degradation and stabilization	CATGGATAAAAGCCTGTTATGACGCTGAAAATGATGTCATGTTAGACGACG
563	Chr	3177622	P, I	-	SL1344_2974	STM2996	3174174	3177545		recC	exonuclease V subunit	DNA/RNA replication, recombination, and repair	GGCCAACCGGATGCAGACAACGCAATCGGGATGTGTCAGCATCAGCGTCAC
564	Chr	3192055	P	+	SL1344_2989	STM3011	3192086	3193114	SL1344_2989-2990	galR	galactose operon repressor	Regulators	GGCGGGGCAAGAGGCTTGAACAGACGTTCATTTTCCGTAAAACTGGCGTAA
565	Chr	3195499	P	-	SL1344_2991	STM3013	3194157	3195419		lysA	diaminopimelate decarboxylase	Amino acid/polyamine metabolism	TAACGGCAGCCATACGTTTCCCTGAATCATTTATCCCATATCATTTTTGCA
566	Chr	3195514	P	+	SL1344_2992	STM3014	3195537	3196472		lysR	transcriptional activator protein LysR	Regulators	GAAAGAATAAAAAATATCGTTTTATTGTCAGTCTATGCAAAAATGATATGG
567	Chr	3198882	P	-	SL1344_2994	STM3016	3197264	3198682		araE	arabinose-proton symporter	Transport and binding proteins	GTCCATATTGTGGGTTTAACTTAATCCATATATTGTTAAATAATAGCTATG
568	Chr	3203326	P	-	SL1344_2998	STM3020	3202421	3203284		No Data	possible regulatory protein	Putative or unknown function	CCTTACTCTTAATCAAGCTAAAGAAATTTCCGCTATTTTATCGTTTAATGT
569	Chr	3203323	P	+	SL1344_2999	STM3021	3203361	3203843		No Data	inner membrane protein	Putative or unknown function	TGAGTAACGCATAACCTATCTACTTTATCGATGGATGTTATCTTTTAGGTA
570	Chr	3219091	S	+	SL1344_3015	STM3039	3219318	3219863		idi	Isopentenyl-diphosphate delta-isomerase	Central intermediary metabolism	CGCTCAAAACCATTCCTCACTCTATTGACAGACGCCTTATGATAGCAGCCA
571	Chr	3229996	P	+	SL1344_3027	STM3051	3230027	3231460		bglA	6-phospho-beta-glucosidase	Electron transport/energy metabolism	CCTGGAATTTTGCGTACGCTTTACATGCCACTTGGTGCAGAATGAATGATA
572	Chr	3232497	P	-	SL1344_3028	STM3052	3231508	3232401		No Data	outer membrane protein	Cell surface/envelope	TCGTTATTTACCTCTCAATATAGTTACAAAAATTTCCGTATATTAAATTCA
573	Chr	3237559	S	-	SL1344_3031	STM3055	3236308	3237402	SL1344_3031-3029	gcvT	Aminomethyltransferase	Amino acid/polyamine metabolism	TTGTGCTGATGGGGTTTTGGCGTTTTTTAGTCATAAGCTAATGTGATGGTA
574	Chr	3243832	P	-	SL1344_3037A	N/A	3243710	3243769		ibs3	Small toxic protein. Toxin-antitoxin system	Stress responses	AAGGCAGCGTTGCGTGTTGTACAGCAATAAAAGGAATTTACGATAAGGGCT
575	Chr	3246282	P	+	SL1344_3040	STM3064	3246310	3247203		iciA	chromosome intitiation inhibitor	DNA/RNA replication, recombination, and repair	CAGGCTACGGATTTCATCTGTACCGACGGCAAATTTATGTCATAGTGCGGA
576	Chr	3248973	P	-	SL1344_3042	STM3066	3248309	3248944		yggA	possible membrane transport protein	Putative or unknown function	GATTAAAATTATCAATTTCCGCTAATAATATTCCCGCGCTATAGTCTGCCT
577	Chr	3253775	S	-	SL1344_3046	STM3070	3252597	3253643		epd	erythrose 4-phosphate dehydrogenase	Vitamins and Cofactors	TCGACTGGACAAACATTCCTTTTATTCCCCGTTTCGCTTATTCTAGCTGAA
578	Chr	3253938	S	-	SL1344_3046	STM3070	3252597	3253643		epd	erythrose 4-phosphate dehydrogenase	Vitamins and Cofactors	GCGCTGATAATATAGACGCTGGCGACAGCGCTTTCTGATATAAATCAGTAT
579	Chr	3259301	S	-	SL1344_3052	STM3076	3257113	3259059		tktA	transketolase	Central intermediary metabolism	TTTGAAATGCGCCCGTTGCAGATGAATTAGCGCCTGGGTTAAGTATAAAGA
580	Chr	3262201	P	-	SL1344_3055	STM3079	3261364	3262179		No Data	hydrolase/acyltransferase	Putative or unknown function	AATCATATTTTTAAATTAGCATTTATTTTTATTATCAATATTATATTTTTA
581	Chr	3269640	P, I	-	SL1344_3061	STM3085	3268754	3269485		No Data	putative outer membrane lipoprotein	Putative or unknown function	AGCAGTTCCTTGAGGAATTTGAAGCGGGACTGTACGGTTATACTTATCTTG
582	Chr	3272099	P, I	-	SL1344_3063A	N/A	3271831	3271980		No Data	Conserved hypothetical protein	Putative or unknown function	TGCGCATTTATGCTTTGCTTTTTTTCTGCGTTCTGGGTATAAAACGCGACG
583	Chr	3272336	S	+	SL1344_3065	STM3090	3272395	3273549		metK	S-adenosylmethionine synthetase	Central intermediary metabolism	ACTCAGACTGCCAGTGTCAGCAACCTTCAGACTCATGGTAGAATCTTCTGT
584	Chr	3274010	S	+	SL1344_3066	STM3091	3274081	3275436		galP	galactose-proton symport (galactose transporter)	Transport and binding proteins	TTGTGATTAGCCTCACATCTTTTTACGGCGTACTCACCTACTCTTAACATC
585	Chr	3275515	P	+	SL1344_3067	STM3092	3275515	3276012	SL1344_3067-3068	sprT	conserved hypothetical protein	Putative or unknown function	GGAAGCGTTTTTCTTGCAGTCCCTCTTCCGTCGCACTATTCTCTGCCGCTA
586	Chr	3276829	P	+	SL1344_3069	STM3094	3276843	3277622	SL1344_3069-3070	yggJ	conserved hypothetical protein	Putative or unknown function	TATGTGCAACGCGCTTGCCAGGCGCGAAAGAGCTAACCTACACTAGCGGGA
587	Chr	3280548	P	-	SL1344_3073	STM3098	3279831	3280517		No Data	probable global regulatory protein	Putative or unknown function	TGAACGGCATGCAGGCTTGTATCCTGGCGAACCGGCGTTAAAATCGCAGCT
588	Chr	3289230	I	-	SL1344_3084	STM3109	3288514	3289233		yggH	conserved hypothetical protein	Putative or unknown function	TGGATAATGCCCGTTTTCAGAACTCAAACACAGCAGACTACACTTTTATGA
589	Chr	3289363	P	+	SL1344_3085	STM3110	3289388	3290440		mutY	A/G-specific adenine glycosylase	DNA/RNA replication, recombination, and repair	CTGCGGAAAGTTCCGGTTTACACCCTGCGGCCTCTGTGCTGCAATCTTGCC
590	Chr	3292095	P	+	SL1344_3088	STM3113	3292158	3293414		nupG	nucleoside permease nupg (nucleoside-transport system protein)	Purine/pyrimidine metabolism	TTTGTCACAGGTAACAAAAAAAGCCCGCCTCTCATTGATAGAATCACACCA
591	Chr	3295952	S	+	SL1344_3090	STM3115	3296036	3296743		yqgA	putative membrane protein	Putative or unknown function	TCGCGCAATCATGGCACCTTTCACCAGGCGGCGCAAGGTAAAATCAGCGCT
592	Chr	3296007	P	+	SL1344_3090	STM3115	3296036	3296743		yqgA	putative membrane protein	Putative or unknown function	ACGTCACAGATAATCAAGCTATTAACAGCTTAATCGCGTGATAATAAGGCA
593	Chr	3300337	P	+	SL1344_3095	STM3121	3300513	3301241		No Data	putative LysR-family transcriptional regulator	Putative or unknown function	AACCTCACTATGCGCTCGCTGGTTTCATTCTTCCAATATATGATGGTGCCA
594	Chr	3302935	I	-	SL1344_3096	STM3122	3301289	3303028		No Data	arylsulfatase	Putative or unknown function	CCGGTACGGCGCACAGTACGCAAAACGAACGTCCTGATATTATCGTGATTA
595	Chr	3307432	I	-	SL1344_3100	STM3126	3306115	3307614	SL1344_3100-3099	No Data	possible amino acid transport protein	Putative or unknown function	GGAGATACCTTTGCTCTTGCGGTATTACTGGCATTTATTATGATGCAAGCG
596	Chr	3327888	P	-	SL1344_3116	STM3142	3326777	3327829		No Data	possible ABC-transport protein, periplasmic-binding component	Putative or unknown function	GCGCCGCATGGAGTACGACATCACCAGCGCGTGATCCCTTAATCACCTCTA
597	Chr	3334493	P	-	SL1344_3124	STM3150	3333347	3334465	SL1344_3124-3117	hypO	hydrogenase-2 small chain protein	Electron transport/energy metabolism	ATGGCGTACCGATCGCAATAACTTCTTCGCGAACAGTGCAAAATAAAAGCC
598	Chr	3334567	S	-	SL1344_3124	STM3150	3333347	3334465	SL1344_3124-3117	hypO	hydrogenase-2 small chain protein	Electron transport/energy metabolism	TATCGCCTCTTCCCTTCGTTTTACTGTTCCGTCGAAGTATTATGGCGCACA
599	Chr	3336718	P	-	SL1344_3126	STM3152	3335027	3336670	SL1344_3126-3125	No Data	methyl-accepting chemotaxis protein	Chemotaxis and motility	AAAATGGAGAATGCATTATATATTCTCCGCGCCTTGCCGATAACGAGAGTG
600	Chr	3338237	S	+	SL1344_3129	STM3155	3338358	3338768	SL1344_3129-3130	No Data	hypothetical protein	Putative or unknown function	CACATCAGGAAGAGTATCGCGCCGGTCAGTAATAGCAATATAATAACAGAA
601	Chr	3341528	I	-	SL1344_3134	STM3160	3341439	3341588	SL1344_3134-3132	No Data	conserved hypothetical protein	Putative or unknown function	TAATGCGTAAGCGCAAAGAAAAAGCAGTAAAGGTGCGGCAGTATGTAAATA
602	Chr	3341659	P	+	SL1344_3135	STM3161	3341698	3342885		metC	beta-cystathionase	Amino acid/polyamine metabolism	TTTTCATCTGTATCACACGTCGCCAGGGTGCAGATGGTTATATTCATGCTA
603	Chr	3344676	P	-	SL1344_3137	STM3163	3343748	3344665		yqhC	probable AraC-family trancriptional regulatory protein	Regulators	ATTTCTCCAGAATGCTGGAGAAAATCGCTAAAAATGCGCACAATCCAGCGG
604	Chr	3344789	P	+	SL1344_3138	STM3164	3344840	3346003		yqhD	probable alcohol dehydrogenase	Putative or unknown function	GGCAGAAATGTGCATTGAGAGACATCCCTCACAAGACCACAATGATGACCA
605	Chr	3356629	P	-	SL1344_3146	STM3172	3355171	3356583		sufI	SufI protein	Cell division	GTGAAGCGACCGGTAAGGTTTAAGCAGCCTTACTCTGTTATTGTAGAAATC
606	Chr	3363590	P	+	SL1344_3153	STM3179	3363614	3364195		mdaB	NADPH-specific quinone oxidoreductase	Stress responses	GCACATTTTGCTAATTTCACCGCACCGCCCGTCAGCGTAGAATCAGCAGCA
607	Chr	3366806	P, I	-	SL1344_3155	STM3181	3364666	3366558		parE	topoisomerase IV subunit B	DNA/RNA replication, recombination, and repair	TCAGAACGAGAACCCCTACACCGGGCAGCAATATGTGCTAGAGTCTCGCCA
608	Chr	3368082	S, I	-	SL1344_3157	STM3183	3367167	3367994	SL1344_3157-3156	icc	cyclic 3',5'-adenosine monophosphate phosphodiesterase	Nucleotide and nucleoside interconversions	TATCCAAATAAAAAGTTGCATCAACGCGACGAAAAGCATCAAATTAATCAG
609	Chr	3369223	S	+	SL1344_3160	STM3186	3369271	3370746		tolC	outer membrane protein TolC precursor	Cell surface/envelope	TGGCACGTAACGCCAACTTTTTGCAGTGGCGGATTCTGCTAGAATCAGCAA
610	Chr	3373665	P	+	SL1344_3164	STM3190	3373790	3374563		ygiE	putative membrane protein	Putative or unknown function	CCCAAAAACAATGCTGGCATACACGTTAAAGACATGATGTTATCCTTACTG
611	Chr	3375170	P	+	SL1344_3165	STM3191	3375206	3377002	SL1344_3165-3167	assT	probable arylsulfate sulfotransferase	Translation/protein modification	CAATCATTTACCTCATTTATTATTCATAAAAACATAGTATATTCAGAAGTA
612	Chr	3375044	S	+	SL1344_3165	STM3191	3375206	3377002	SL1344_3165-3167	assT	probable arylsulfate sulfotransferase	Translation/protein modification	TCGTACTAATTTATATTGTTCTTAAAATATCACACTCCTACTATCGACTCA
613	Chr	3379224	S	+	SL1344_3169	yqiC	3379646	3379945		No Data	conserved hypothetical protein	Putative or unknown function	AGGCGTACCAAAAGAGGAAAGTAGCGTCTGATTCATGGTAAAAAAACCTCA
614	Chr	3389075	P	-	SL1344_3175	STM3202	3387706	3389007	SL1344_3175-3173	ygiF	conserved hypothetical protein	Putative or unknown function	CCGTCAAATTGCTCGTTGCATGGCAATTTGGCGCAAAATACTATCTACTGA
615	Chr	3389900	P	+	SL1344_3177	STM3204	3389926	3391167		cca	tRNA nucleotidyltransferase	DNA/RNA interactions and degradation	GCTGGATGAACTAAATCGCCTTCTCTGCGGCACTGTCTTATCATTAGAGGA
616	Chr	3392143	P	-	SL1344_3178	STM3205	3391272	3392096		bacA	bacitracin resistance protein (putative undecaprenol kinase)	Stress responses	TAAAAATAAATAATTTTATATTTTTTAAACCAAACGGTTATATATGGGGTC
617	Chr	3395088	P	+	SL1344_3184	STM3210	3395211	3396956		dnaG	DNA primase	DNA/RNA replication, recombination, and repair	AAGGAATGCGCGGCTTGTTTTCGTTTATGCATTAGCATATACACAAAATCA
618	Chr	3396690	S, I	+	SL1344_3185	STM3211	3397106	3398953		rpoD	RNA polymerase sigma-70 factor	Transcription factors	ATAAGCTGCCTGGACTTGGCTTATTTAAAGAATTGGTCAAAACTTGTTTGG
619	Chr	3400676	P	-	SL1344_3187	STM3214	3399864	3400631		yqjH	conserved hypothetical protein	Putative or unknown function	CACTATCAAAAAACAGTTGCATTTTTACTGATTAACAATCATTATCATTTA
620	Chr	3400924	I	+	SL1344_3188	STM3215	3400866	3401510		yqjI	conserved hypothetical protein	Putative or unknown function	TCAACATGAAGGGTGTTGCAAAAACCGGGATCATATGCACGATGGTTGCTG
621	Chr	3400843	P	+	SL1344_3188	STM3215	3400866	3401510		yqjI	conserved hypothetical protein	Putative or unknown function	AATCGCTTTTATCCTTGCTAAAAACCATCATTTAGATATAAATTAGATATA
622	Chr	3405023	P	-	SL1344_3190	STM3217	3403460	3404980		aer	aerotaxis receptor protein	Chemotaxis and motility	GAGCAATTTTAACAACTAAAGATAAATAGATTAGCGCCGAAATAACATCTG
623	Chr	3406917	P	+	SL1344_3192	STM3219	3406960	3408978		fadH	2,4-dienoyl-CoA reductase [NADPH] (ec 1.3.1.34) (2,4-dienoyl coenzyme A reductase)	Fatty acid/lipid metabolism	TCACCACATTCCCCTTTTCCCTTTTACCTCGCGACGGCTACAGTAGTAACT
624	Chr	3410407	I	+	SL1344_3194	STM3221	3410281	3410778		No Data	conserved hypothetical protein	Putative or unknown function	GCCTGGGAGCAGTGCTGGAAAAACGTTATCCCGGCGCGCATGATTACGCCA
625	Chr	3410837	P	+	SL1344_3195	STM3222	3410930	3411622		ygjQ	conserved hypothetical protein	Putative or unknown function	AATGCCCCTTCCCCCGTATCTTTTTAACGGCGTGGGCATAAAATCGGCGCG
626	Chr	3415729	P	+	SL1344_3199	STM3226	3415899	3416561	SL1344_3199-3200	yqjA	putative membrane protein	Putative or unknown function	CGACGCGTAATTTCTATAACGGACTTCGTTGACCTTTGTTACAATTAGATG
627	Chr	3421696	P	+	SL1344_3208	STM3236	3421718	3422419		yhaK	conserved hypothetical protein	Putative or unknown function	GGCAGAATATCTGGCTAACAATGCAGCGTCCAGCCCCTTAACATAAAAGGA
628	Chr	3423588	I	-	SL1344_3210	STM3238	3422720	3424030		yhaN	conserved hypothetical protein	Putative or unknown function	GGCGAAAGTGTATAGCGGCGATAGCTGGGCATGTGTCACGATCGTCGGCGA
629	Chr	3425484	P	-	SL1344_3211	STM3239	3424056	3425387		yhaO	putative membrane transport protein	Putative or unknown function	AGGCGTTTTATTGGTAAGTTTTTCTCTTATCGTGCGCGTATGATTTTCTTA
630	Chr	3434145	P	-	SL1344_3217	STM3245	3433178	3434116	SL1344_3217-3212	tdcA	TDC operon transcriptional activator	Regulators	GTGAGTGGTCGCACATAACCTTTAAGATTTAATTTGCTACACTTCCTGCCG
631	Chr	3439273	P	+	SL1344_3223	STM3250	3439374	3440945		garD	D-galactarate dehydratase	Central intermediary metabolism	CGGTGATCTGGATCACATTCTTATATTTATACTCCTGTCATTCTTATTTCA
632	Chr	3443130	S	-	SL1344_3225	STM3252	3442143	3442976	SL1344_3225-3224	agaR	putative transcriptional repressor	Putative or unknown function	AATGAAAGAAAAAGTGTGGATTTAAATTTTGTTTTGTAAGTAAATGGAAGA
633	Chr	3452151	P	+	SL1344_3235	STM3262	3452174	3452947		gatR	galactitol utilization operon repressor	Regulators	TTTCGAAATTTAGCGTTCACCTTTCGCAATCCTTCGTTTAAACTAGTTACA
634	Chr	3454002	P	+	SL1344_3237	STM3264	3454032	3456074		yraM	LppC family lipoprotein, transglycosylase	Cell surface/envelope	GATTCGTTTTGTTTCATTGTGTCGTCCGTATTGCCGATTTAATATTGAGCA
635	Chr	3456381	P	+	SL1344_3239	STM3266	3456449	3457039		yraO	DnaA initiator-associating protein DiaA	DNA/RNA replication, recombination, and repair	TGGGAGTTTTGATACTGTGGATTGTCGGTTCGATGTGTTAGCCTTCACCGG
636	Chr	3459424	P	+	SL1344_3244	STM3271	3459436	3459753		yhbQ	conserved hypothetical protein	Putative or unknown function	GGCCAATAGCGGTAAGTGTGTCCATCTTTATTCTCGCTTATACTGGGAACC
637	Chr	3460378	P, I	-	SL1344_3245	STM3272	3459740	3460243	SL1344_3246-3245	yhbS	putative acetyltransferase	Putative or unknown function	TTCCAGCGTCGACTGGTCATTGAAGGCGATACTGAGTTAGGGTTGTATGTG
638	Chr	3460932	P	+	SL1344_3247	STM3274	3460978	3461973	SL1344_3247-3248	yhbU	putative protease	Putative or unknown function	TTAACTGCCTTAAATCAAAAATTGTCGCAGCAAGGTTAACTAAAATCCCTG
639	Chr	3474351	P, I	-	SL1344_3258	STM3285	3473693	3474094	SL1344_3258-3257	rbfA	ribosome-binding factor A (P15B protein)	Translation/protein modification	ATCGGCGTGAAGAACTACAACGACGTTCGCGTTGGCGATATGATTGAAGTA
640	Chr	3479328	P	+	SL1344_3262	STM3290	3479628	3480971		argG	argininosuccinate synthetase	Amino acid/polyamine metabolism	CCCCGCGCCTGAAACGTGGCAAATTCTACTCGTTTTGGGCAAAATTTGCAA
641	Chr	3479179	S, I	+	SL1344_3262	STM3290	3479628	3480971		argG	argininosuccinate synthetase	Amino acid/polyamine metabolism	TCCGAAAGAATTTTTTTCAAATCCAGCTACGAAGGACATAATCTTCACAGT
642	Chr	3482218	P	-	SL1344_3263	STM3291	3481057	3482121		No Data	conserved hypothetical protein	Putative or unknown function	TACGAGATCATCTTCGTTCATTGAAGCCAGTAGTTGCTCAGCTATAATCTG
643	Chr	3488083	P	-	SL1344_3268	STM3296	3486106	3488040		hflB/ftsH	cell division protein	Cell division	ATTTCAGACGTAAGGTTTGAAAGAAACTGGATATAGAGTATCCTGACGCTG
644	Chr	3489968	P	-	SL1344_3271	STM3299	3489346	3489822		greA	transcription elongation factor	Transcription factors	CTAAAAAGTAAACGATGACCCATAGGGAACTCCAGGGTAAAATGGTTATCA
645	Chr	3497577	P	-	SL1344_3279	STM3307	3496312	3497571		murA	UDP-N-acetylglucosamine 1-carboxyvinyltransferase	Murein and peptidoglycan metabolism	TAAGCTACGGGTAACCTGCCGGTAGCGGAGATGAATGCTTAACTGAGAATA
646	Chr	3497945	P	-	SL1344_3280	STM3308	3497625	3497918		yrbA	conserved hypothetical protein	Putative or unknown function	ACCATCCGGCACTTTTACCGCGCTGATTTATCAGCGTAATCTTTTGCTTAT
647	Chr	3501251	S	+	SL1344_3286	STM3314	3501430	3502365	SL1344_3286-3296	yrbG	putative membrane protein	Putative or unknown function	TGAGGTAACCATGGCGCTGAATTTAACCATGGGTTCGACATAATTACAGAA
648	Chr	3515295	P	-	SL1344_3301	STM3329	3514339	3515268		yhcC	conserved hypothetical protein	Putative or unknown function	GATTGATCCAGGTCATCGCCAAAGGAGACTAAAAATGGCAGGCTTTGGCCT
649	Chr	3533705	P	-	SL1344_3315	STM3343	3532871	3533623		No Data	conserved hypothetical protein	Putative or unknown function	AGTCCGAATCCAGTCTCTTTTCCTCCCTATCTTTAGCATTATTCTCATCTT
650	Chr	3536082	I	-	SL1344_3318	STM3346	3534962	3536086		yhcM	putative ATP/GTP-binding protein	Putative or unknown function	GCCGTGAACGACGGCACATCGATTTTCAAGGAATAACAATAACATTATGCA
651	Chr	3538267	P	+	SL1344_3321	STM3349	3538294	3539364		degS	serine protease	Protein folding, degradation and stabilization	GGCATCAGCCTGCGATGTGATGTCCGGTTAACTCATGGTATGCTGCTGCCG
652	Chr	3549079	S	-	SL1344_3331	STM3359	3548096	3549034		mdh	malate dehydrogenase	Central intermediary metabolism	TTGATGAGTGAGGATTGTAATCATTGAATTTGTGAATTAAGGTCGCCGCCG
653	Chr	3549346	P	+	SL1344_3332	STM3360	3549448	3549918		argR	arginine repressor	Regulators	GCGTGACACAGGCATGTTTCTTGATAACGAAATTTGATAAAATTCCGCTCT
654	Chr	3568323	P	+	SL1344_3349	STM3376	3568431	3569405		yhdH	possible oxidoreductase	Putative or unknown function	CTGAAGGCGGAATTCGCCACGGCGCGCAATGAAGCAGGCATACTACCAAAA
655	Chr	3576442	P, Alt	+	SL1344_3357	STM3384	3576691	3577656	SL1344_3357-3359	yhdG	conserved hypothetical protein	Putative or unknown function	AAACGAGACGGCGATCCCATTCATTTGGGGTAATTAGCTTATAAAAAAAGC
656	Chr	3578943	P	+	SL1344_3360	STM3387	3579031	3579195		yhdU	putative exported protein	Putative or unknown function	ACCTGTCCAAAAAGCAGCGAAATGTCGGGATAAACGCGCTATCTTCAGAGA
657	Chr	3593794	P	+	SL1344_3366	STM3399	3593964	3594518		yrdA	putative transferase	Putative or unknown function	GTGTGAAGTGATTCACATCCGCCGTGTCGATGGAGGCGCATTATAGGGATC
658	Chr	3604146	I	-	SL1344_3379	STM3412	3603447	3603872		zntR	putative Zn (II)-responsive regulator	Putative or unknown function	GCGAGTTTGATAATTTGCCTGGCCGTGGCGAGCCGCTTATTCTGGATGATG
659	Chr	3604007	P, I	-	SL1344_3379	STM3412	3603447	3603872		zntR	putative Zn (II)-responsive regulator	Putative or unknown function	TGCTATTCAGTTACTTGATATCCTCAACAGTATCCGGGAAGATGACCCTCG
660	Chr	3607873	P	-	SL1344_3386	STM3419	3607361	3607477	SL1344_3386-3381	rpmJ	50S ribosomal subunit protein L36	Translation/protein modification	TTCGCTGTATTTGCAGCCTGGGCAACCGCTTTATGTGTTACTCTATGCGTC
661	Chr	3608093	S	-	SL1344_3386	STM3419	3607361	3607477	SL1344_3386-3381	rpmJ	50S ribosomal subunit protein L36	Translation/protein modification	TTGTAGTATTCGTTGAACGTGGTCAACGCCGTATTGTGGTAAACTACGCCA
662	Chr	3621364	P, I	-	SL1344_3412	STM3445	3619784	3620968		tufA	elongation factor Tu	Translation/protein modification	GGTTCTTACCATGACGTTGACTCCTCTGAGCTGGCGTTTAAACTGGCTGCG
663	Chr	3621223	S	-	SL1344_3412	STM3445	3619784	3620968		tufA	elongation factor Tu	Translation/protein modification	ACCGGTGACGTTATCGGCGACCTTAGCCGCCGTCGTGGTATGCTCAAAGGT
664	Chr	3625086	P	-	SL1344_3417	STM3450	3624612	3624968	SL1344_3417-3416	yheM	conserved hypothetical protein	Putative or unknown function	AGCGCTGAACATCTGTGTCGCGGCGGCGCTTCGTCGCGGTATTATTGATGA
665	Chr	3627219	S	-	SL1344_3420	STM3453	3626353	3627171		fkpA	FKBP-type peptidyl-prolyl isomerase	Protein folding, degradation and stabilization	TAGGGCGTGTTCGTATGTTGATTTGTTCTGCAACGATTTATAGTACGCTTC
666	Chr	3627387	S	-	SL1344_3420	STM3453	3626353	3627171		fkpA	FKBP-type peptidyl-prolyl isomerase	Protein folding, degradation and stabilization	CGGCTTTCCAGTTCAGCCAGACGAGCTTCCATCGTGATATCCTGCATGATG
667	Chr	3634133	P	-	SL1344_3428	STM3461	3633608	3633919		No Data	conserved hypothetical protein	Putative or unknown function	CTGTGGACGTGATCTCAACCATAGCACCAGAACAATTGATAATTGGAAACA
668	Chr	3641826	P	-	SL1344_3436	STM3469	3641242	3641805		pabA	para-aminobenzoate synthase component II	Vitamins and Cofactors	TTTTCAGAAAGCGATAAGCGAAGCTCGCGAAACTGAGTAAAATAGTGCGGT
669	Chr	3643469	P	+	SL1344_3440	STM3473	3643554	3644735		yhfC	putative membrane protein	Putative or unknown function	ATGTGACAAACATCACATTAAAAAATGCAATGAACATTACTATCACTAATA
670	Chr	3644974	P	+	SL1344_3441	STM3474	3644998	3647541		nirB	nitrite reductase large subunit	Anaerobic metabolism	ATTTGATTTACATCAATAAGCGGGGTTGCTGAATCGTTAAGGTAGGCGGTA
671	Chr	3671408	S	-	SL1344_3461	STM3494	3670820	3671383		yrfE	putative NUDIX hydrolase	Putative or unknown function	AACGGCAATTCGCATTGCCGAAACCGTGCGGTATGTCGCACAATGACCACA
672	Chr	3674343	P, I	+	SL1344_3464	STM3497	3674582	3674983		yrfH	heat shock protein	Protein folding, degradation and stabilization	GGTCTGGCCTCACACCTTGATTTATTACTTTCCACCCACACATTTGGTTAT
673	Chr	3677728	P	-	SL1344_3466	STM3499	3675996	3677705		yhgE	putative membrane protein	Putative or unknown function	ATTATGCATGACGACGCCTGGCGGTGAACAGATGGTGCAATAATGCGGCTT
674	Chr	3678058	S	+	SL1344_3467	STM3500	3678085	3679704		pckA	phosphoenolpyruvate carboxykinase	Central intermediary metabolism	ATGAGCCTTGTCGCGGTTAACCAACCTCAAAAAACCTTACTATTTTCGGTA
675	Chr	3681701	P	+	SL1344_3470	STM3503	3682073	3682546		greB	transcription elongation factor GreB	Transcription factors	ATCGACAGACCATCTTCACCTGGCAGCATTAAATCCAGTACCATGAGATGG
676	Chr	3682615	P	+	SL1344_3471	STM3504	3682648	3684975		yhgF	putative transcription accessory protein	Putative or unknown function	CCCCCGCTGATGGCTGGCATTTTTGCCAGCCAATCCGTATAACTATCCCCT
677	Chr	3685652	P	+	SL1344_3473	STM3506	3685658	3687976	SL1344_3473-3474	feoB	ferrous iron transport protein B	Anions/cations and iron carrying compounds	ATTTGGCGTTAATAGAAGTGGAAGCGGTTTCCTGTTAATACAGTGAGTCTA
678	Chr	3690195	P	+	SL1344_3477	STM3510	3690218	3690901		yhgH	putative competence protein	Putative or unknown function	TCCCTCGCCGTAGGTCTGCCACCAGATGTCATTCATCAGTTACTGTTCTCT
679	Chr	3697995	P	-	SL1344_3481	STM3514	3695435	3697828	SL1344_3481-3480	malP	maltodextrin phosphorylase	Electron transport/energy metabolism	TTTACTGTTATTTCTGTTTATTCATTTGATTATGCGTAACACTGGGTGTCG
680	Chr	3698332	S	+	SL1344_3482	STM3515	3698422	3701127		malT	MalT regulatory protein	Regulators	TGTGACAGAGTGCAAATTCAGACACATAAAAAGTCTGCTTAGCTTGCATTA
681	Chr	3698024	S	+	SL1344_3482	STM3515	3698422	3701127		malT	MalT regulatory protein	Regulators	AAACGCGCCGATTCCTGTCAACGACACCCAGTGTTACGCATAATCAAATGA
682	Chr	3706168	P	+	SL1344_3488	STM3522	3706190	3707773		rtcR	transcriptional regulatory protein	Regulators	GAAAGAAAAATGCCTGCACGGTAGTCATTAAAAAGCGATAAAATTATCTCG
683	Chr	3709478	P	-	SL1344_3491	STM3524	3708621	3709451	SL1344_3491-3490	glpG	putative membrane protein	Putative or unknown function	AATCCCATAAAGATGCAGCCTCCGACGAGAAGGGTATATATACTGTCTTCT
684	Chr	3714743	I	-	SL1344_3496	STM3529	3713815	3714924		No Data	putative glycerol dehydrogenase	Putative or unknown function	CTACCGGGATACAGTTGCAACAGCACTGCACGGGGTGATTGAATTTGATAT
685	Chr	3718835	I	+	SL1344_3499	STM3532	3718352	3719257		No Data	putative dihydrodipicolinate synthetase	Putative or unknown function	GACAGGACCTTAGCGTTGATTTAATTACCCGGCTGGCGCAAGATCACCCCA
686	Chr	3718948	I	+	SL1344_3499	STM3532	3718352	3719257		No Data	putative dihydrodipicolinate synthetase	Putative or unknown function	GTCAGGCCAGTGCGTCCGGACTTCGTTATTTTCTCCGGCTATGATGAATAT
687	Chr	3720085	P	-	SL1344_3500	STM3533	3719301	3720056		No Data	putative IclR-family transcriptional regulator	Putative or unknown function	CTTGGTCTCTGTCATGGAAAAAGGGTCGAGTACTGGTGTATAGTATTAGCA
688	Chr	3720172	S	-	SL1344_3500	STM3533	3719301	3720056		No Data	putative IclR-family transcriptional regulator	Putative or unknown function	TTGAGAACGGGGCCAAACGGCCCCGTTTTTTATCGTGGTATATTCGGGGGG
689	Chr	3731280	S	-	SL1344_3506	STM3539	3729950	3731056		asd	aspartate-semialdehyde dehydrogenase	Amino acid/polyamine metabolism	GTACGCGCATAAAAGCAGGCAAATTTCTACGCTGATCCATAATTAGGATCA
690	Chr	3735335	P	-	SL1344_3510	STM3544	3734614	3735309		yhhW	conserved hypothetical protein	Putative or unknown function	TCAATTTTCACCCTCTATGATCCCGGACGGAATGAGTCCACACTTATTCCA
691	Chr	3736494	P	-	SL1344_3511	STM3545	3735433	3736470		yhhX	putative oxidoreductase	Putative or unknown function	GCAAAGAATCCAACATTCAGTCTCCTCACGCTTTACGCTATGGTGTAGACA
692	Chr	3736913	P	+	SL1344_3512	STM3546	3736939	3737427		yhhY	putative acetyltransferase	Putative or unknown function	GCAAAAAAAATGCGGTTGACGGAATTTTCTTTCTCAGCGAGTGTAAATACA
693	Chr	3761605	P	+	SL1344_3537	STM3572	3761669	3762265	SL1344_3537-3538	yhhF	conserved hypothetical protein	Putative or unknown function	CCCCTCGCGGCGCTATATACATGGAAGCTAAAAAAATGATGAAATAGTCTA
694	Chr	3762940	P	-	SL1344_3539	yhhM	3762546	3762788		No Data	putative inner membrane protein	Putative or unknown function	CCGTGACGGTCAGATGACAACACTATAACGGGCAGGGTATGCTTATTTCCG
695	Chr	3770869	P	+	SL1344_3547	STM3582	3770894	3771943		yhhT	putative membrane protein	Putative or unknown function	ATCAGTAGTGAGATTCAGATTATCGGTATCAGGGCAGCCGCTACACTTAGA
696	Chr	3771968	P	+	SL1344_3548	STM3583	3771995	3772573	SL1344_3548-3549	acpT	conserved hypothetical protein	Putative or unknown function	GACCGAAAAGCCGTTTACCGGGATGAGGCGACAGATGCTACAATCTCCTCT
697	Chr	3782045	P	-	SL1344_3555	STM3590	3781454	3781789		uspB	universal stress protein B	Stress responses	ACTCTATGCGCGGGGCTAGCTCAGCCGTTTACCATAACTATCCTTACATTA
698	Chr	3795863	P	-	SL1344_3566	STM3601	3794701	3795678		No Data	phosphosugar isomerase	Putative or unknown function	GAACTCTCCTGCGTTTCGCAACAGTTGATTGTCGGCGATAAAATACGGTTT
699	Chr	3796603	P	-	SL1344_3567	STM3602	3795854	3796573		No Data	gntR family regulatory protein	Putative or unknown function	ATGGCGTGGATTCACAAGCAAAGGTAACGTAAATAGTTATAATACAAGCTA
700	Chr	3801937	S	-	SL1344_3571	STM3606	3800793	3801395		yhjB	hypothetical luxR-family transcriptional regulator	Putative or unknown function	CTGAAGCGGCTGGTTTTATTGATTTTCTAGCACCTAATAAGCCCTTTCGCA
701	Chr	3801697	P	-	SL1344_3571	STM3606	3800793	3801395		yhjB	hypothetical luxR-family transcriptional regulator	Putative or unknown function	TTTTCAGGCGGATTGGCTATTTTTTAACAAAATGTGCTACTTTATTTTTTG
702	Chr	3826027	S	-	SL1344_3586	STM3621	3825541	3825744	SL1344_3586-3580	yhjR	conserved hypothetical protein	Putative or unknown function	CACCAGACGCCGCCGGTTGGCATATGGCGCAGTTCATCCCATAATGATGAG
703	Chr	3829796	P	-	SL1344_3589A	N/A	3829506	3829613		ldrB	Small toxic peptide. Type 1 Toxin-antitoxin system	Stress responses	TGCACGTTAGCGCCGTGCCGGGACGGGGATTTTGCCGTAATATCAGCAGCA
704	Chr	3840543	P	+	SL1344_3599	STM3633	3840567	3841574		No Data	putative lacI-family transcriptional regulator	Putative or unknown function	ACTGAAAAAAAGCAAACGTTACCGTCTGGTAAATATGCTACCCTGTGCGCA
705	Chr	3854004	P	-	SL1344_3610	STM3644	3851635	3853968		bisC	biotin sulfoxide reductase	Regulators	ATGAAGAAAATTCCAGGGAAAACTCTGAAATTTGTAAGTAACATTGATCGG
706	Chr	3856789	P	-	SL1344_3613	STM3647	3856026	3856736		yiaF	outer membrane lipoprotein	Cell surface/envelope	CGCGTGGAAAGGGTATCCTGCAAGCCTGACCTGGACTATCCTTGTAAGCCG
707	Chr	3858114	P	+	SL1344_3616	STM3650	3858263	3858679		No Data	conserved hypothetical protein	Putative or unknown function	CCCTGCGTCCCTTTGACCTTTCCCTTAGGGGAACCCCTATAGTAGGCAGGG
708	Chr	3871488	I	-	SL1344_3628	STM3663	3870706	3871530		bax	putative exported amidase	Putative or unknown function	GAGACCTAATGATATTGACTCCCATGCGACGATATGGGGCAATGATTCTTA
709	Chr	3875828	P	-	SL1344_3631	STM3666	3875334	3875807		ysaA	putative electron-transport protein	Putative or unknown function	TTGCGTAGTGGGATCAAAGCGGCGGGGAATGGCTCTCTGGCATTCTGGCGT
710	Chr	3876882	P	+	SL1344_3633	STM3668	3876954	3877952	SL1344_3633-3634	yiaK	putative carboxylic acid dehydrogenase	Putative or unknown function	AACCTTCTCTGGCGTTGCCATGTCAATTTTTGATCTATATATTTGGAACTA
711	Chr	3878439	P	+	SL1344_3635	STM3670	3878452	3879384		No Data	hypothetical protein	Putative or unknown function	ACGGAAAATAGTCGTAAAAGTCGCCATAGACGTTTTATAAAATAGAGTTTA
712	Chr	3886994	P	-	SL1344_3643	STM3678	3886136	3886951		No Data	putative transcriptional regulator	Putative or unknown function	ATGTGAGATGGATCGAGTGAAATGACTATTTTTAGTTAATAATCAAAAGCT
713	Chr	3887152	S	-	SL1344_3643	STM3678	3886136	3886951		No Data	putative transcriptional regulator	Putative or unknown function	AAGGCTGTAGAGGTCATAGATATTCCTCGCTGACGGGGTATTTTATGGCAG
714	Chr	3895452	P	-	SL1344_3648	STM3683	3894008	3895399	SL1344_3648-3647	selA	L-seryl-tRNA (Ser) selenium transferase	Translation/protein modification	CTTGACGCGCATTATGTCCGCCTGAGCAAACTCACGTTACAATCCCCCTTA
715	Chr	3896151	S	+	SL1344_3650	STM3685	3896582	3898498	SL1344_3650-3652	mtlA	mannitol-specific enzyme II of phosphotransferase system	Transport and binding proteins	TTTCATGCCGTGTCCTTTTTGCCAACCAGTAAAAATCATAGTATGGCTCAA
716	Chr	3900838	S	+	SL1344_3654	STM3689	3900964	3901326		yibL	conserved hypothetical protein	Putative or unknown function	AAAGGGCGCTTCATCTTTTCTTTCGACAAAAAGGATTTTATTCTCAACGAG
717	Chr	3910889	P	+	SL1344_3660	STM3695	3910906	3911379		yibK	putative RNA-methyltransferase	Putative or unknown function	CTGAACGCCTGGCGCGTGAGAGCCCGGTAAATTTCTGCTATTCTGCCCCCG
718	Chr	3918612	I	-	SL1344_3669	STM3703	3918199	3918630	SL1344_3669-3668	yibN	rhodanese-like sulfurtransferase, exported protein	Stress responses	TTTAATCACTACGTCGGGAGTTGTTACCCCCCATGCAAGAAATTATGCAAT
719	Chr	3918844	P	+	SL1344_3670	STM3704	3918878	3920422		pmgI	2,3-bisphosphoglycerate-independent phosphoglycerate mutase	Central intermediary metabolism	CTTTGATCTTCTGAGGCTATTTTATCGATTCAGCTGTAGTAAAATTACGCA
720	Chr	3918629	S	+	SL1344_3670	STM3704	3918878	3920422		pmgI	2,3-bisphosphoglycerate-independent phosphoglycerate mutase	Central intermediary metabolism	AGGCGATACTCAGTATGGGATGACGGCCAACAAATTGCATAATTTCTTGCA
721	Chr	3918560	S	+	SL1344_3670	STM3704	3918878	3920422		pmgI	2,3-bisphosphoglycerate-independent phosphoglycerate mutase	Central intermediary metabolism	TAATCACCTTAACTTTTGAAGTCAGACCTTTGAACGTGGTAAATAAAACCG
722	Chr	3923730	P	-	SL1344_3673	STM3707	3922668	3923702		yibD	putative glycosyltransferase	Putative or unknown function	AATTATGGCGGCTTAATAGTTTCTTAATAGAGCCACAGTATAAAGGCAGGG
723	Chr	3926523	S	+	SL1344_3676	STM3710	3926630	3927562	SL1344_3676-3679	rfaD	ADP-L-glycero-D-mannoheptose-6-epimerase	Polysaccharide and LPS metabolism	CGATACGTTGATACGAGATGACGCGTCATCACTTCTTTAAAATGCAGCATA
724	Chr	3935482	P, I	-	SL1344_3683	STM3717	3933801	3934811	SL1344_3683-3682	rfaJ	lipopolysaccharide glucosyltransferase	Polysaccharide and LPS metabolism	ACTGGACCTATGCAACATACTTTAGATTCATTATCGCCGATTATTTTTCAG
725	Chr	3940349	P	-	SL1344_3689	STM3723	3939173	3940207	SL1344_3689-3684	rfaQ	lipopolysaccharide core biosynthesis protein	Polysaccharide and LPS metabolism	ATAAAAATTATTCGTATCGGATTGCTGCGAAAGAAGTGTTACACTAGCGCA
726	Chr	3940587	S	+	SL1344_3690	STM3724	3940718	3941929		kdtA	3-deoxy-D-manno-octulosonic-acid transferase	Polysaccharide and LPS metabolism	CAGCGCCTGGAATCCTCGCTTCTGAGCCAATTTGGCGCAAAAATGGGAAAA
727	Chr	3941836	P	+	SL1344_3691	STM3725	3941938	3942417		coaD	phosphopantetheine adenylyltransferase	Vitamins and Cofactors	AAAGAAGTTTCCTCTTTACTGACCGACGCTGATTATCGTAATTTCTACGGA
728	Chr	3951837	P	+	SL1344_3704	STM3738	3951856	3952473		yigC	putative membrane protein	Putative or unknown function	TAGAAAATCTCAATCGTGATACAGCGCACAAATCGTTAATCTTCGCCCCCA
729	Chr	3970056	P	-	SL1344_3716	STM3750	3968220	3969602	SL1344_3716-3715	yicJ	sodium:galactoside family symporter	Transport and binding proteins	AATAATATTCCACTTTCTCTATCCACCTTTCCTTTCGTATTATATGCAAGA
730	Chr	3973010	P	+	SL1344_3720	STM3755	3973047	3974084		rhuM	putative DNA-binding protein (SPI3)	Pathogenesis	ACGCTATCTGCGTAATAAGCTTCACCAGGAATTTCTGGCATACTAGGCAGA
731	Chr	3976773	I	+	SL1344_3723	STM3757	3976075	3978942		misL	putative autotransported protein (SPI3)	Pathogenesis	AATACGATTGTCGTCGGCAATCGTGCGCATATTGTTACTACCGGCGACAGT
732	Chr	3980326	P	-	SL1344_3725	STM3759	3979512	3980300	SL1344_3725-3724	marT	putative transcriptional regulator (SPI3)	Pathogenesis	ACAATCCATGTCCTGCTACGCAGCCACAGCATCAGACTATACTCAGTGGTG
733	Chr	3982638	S	-	SL1344_3727	STM3762	3982062	3982541		cigR	putative inner membrane protein	Pathogenesis	CCTGATAGCAATCATCCTGATTTTACTGACTATCTGGATACGATAAGCTGC
734	Chr	3986972	P	+	SL1344_3730	STM3765	3987006	3987908		yicL	putative membrane protein (SPI3)	Pathogenesis	AACAATAAATTCCTGCTTAATACCGGCGATAGCTCTGTTATGATGCCTGCA
735	Chr	3986871	S	+	SL1344_3730	STM3765	3987006	3987908		yicL	putative membrane protein (SPI3)	Pathogenesis	AGGCGGGTTTAGTGACGTTCTGTTTAAGTTTGTTTGATATTTTTTCTTATG
736	Chr	3996689	P	-	SL1344_3738	STM3773	3993863	3996661	SL1344_3738-3731	No Data	putative NtrC-family transcriptional regulator	Putative or unknown function	CTCGCTGCGCCTTCACTTTCTTGCGTGGCAGAATAGTGTATGTTCTGACTA
737	Chr	3996826	P	+	SL1344_3739	STM3774	3996858	3997151		No Data	putative secreted protein	Putative or unknown function	ACGGATAGCACGCCCCGATGAGTGAACGTCGCACGGTCTACACTTACTCTT
738	Chr	4008917	P	-	SL1344_3753	STM3787	4007492	4008883		uhpT	hexosephosphate transport protein	Transport and binding proteins	TGGACGCTGTCGCAGGCCACTTTTCCTGTGGATTTTTACAATGCCTGCCAT
739	Chr	4012483	P	-	SL1344_3756	STM3790	4011866	4012456	SL1344_3756-3754	uhpA	two-component system response regulator protein	Regulators	TGACCGCTCAAGGCTTGAACAGCCGCGCGCTTATCGTTAAGGTAAGCGCGT
740	Chr	4015862	P	-	SL1344_3759	STM3793	4014903	4015823	SL1344_3759-3757	No Data	putative carbohydrate kinase	Putative or unknown function	TCGCGATCATAGTCACAAATGATACGGAAGTAACATGATAATGTTATTTTA
741	Chr	4016024	S	-	SL1344_3759	STM3793	4014903	4015823	SL1344_3759-3757	No Data	putative carbohydrate kinase	Putative or unknown function	GCACTACTATACGTCCGGCTGTCAGGAAATAAAAGTGGGTTTATTCGCGTT
742	Chr	4016000	S	+	SL1344_3760	STM3794	4016148	4016933		No Data	putative DeoR-family transcriptional regulator	Putative or unknown function	CCTGGCGGAACATACGCGCACCAAATCATTTTTATTGTTACAATTTACTGA
743	Chr	4019245	S	-	SL1344_3763	STM3797	4019024	4019122	SL1344_3763-3761	ivbL	ilvB operon leader peptide	Amino acid/polyamine metabolism	CCCGGCGATTACCGGAGGGCGCTACGCTTATCACGCCTATACTCAAAGCGT
744	Chr	4025775	I	+	SL1344_3770	STM3802	4025766	4027088		dsdA	D-serine dehydratase	Amino acid/polyamine metabolism	TTCCTGCTTTCCTTTATCATCTGATCGTAAAGAGACGTACTATGGAAAACA
745	Chr	4027737	P, I	-	SL1344_3771	STM3803	4027170	4027700		yidF	conserved hypothetical protein	Putative or unknown function	TTTGATCTCCCTCGCGGTGTTGTCGCTCGCAATCCTGTTTGCTGTTACCCA
746	Chr	4030532	P	-	SL1344_3774	STM3807	4028840	4030501		yidE	putative membrane protein	Putative or unknown function	ATGTGCGCCATGCTGTATATATGCCTTAACGGTTCAGTCATAATCCCTATA
747	Chr	4031920	P	+	SL1344_3777	STM3810	4031949	4032284		yidQ	putative lipoprotein	Putative or unknown function	CCACGTACTGGTGATGTTATTTTTAGCAACGGATCGCTATAACTCATCATG
748	Chr	4041372	P	-	SL1344_3786	STM3820	4039909	4041309	SL1344_3786-3779	No Data	probable cytochrome c peroxidase	Putative or unknown function	TTATTGATACCAATCAATATCCATGATGGGTTTGTATTTAGTATTGACGGG
749	Chr	4045950	P	+	SL1344_3790	STM3824	4045980	4046672		torR	torCAD operon transcriptional regulatory protein	Regulators	TATGAACAGCGTCACTGGTCAGGATGAACGGGATACGGCAATATATGAACA
750	Chr	4047722	S	+	SL1344_3792	STM3826	4047765	4050500		torS	Two-component sensor protein histidine protein kinase	Regulators	ATAAGCGCGCGCATGATAGCCCCACCAGCAACAAGGTTTTATCCTAATGGT
751	Chr	4066542	S	-	SL1344_3805	STM3838	4064938	4066338	SL1344_3805-3803	dnaA	chromosomal replication initiator protein	DNA/RNA replication, recombination, and repair	TCTGTGAGAAACAGAAGATCTCTTGCTCAGTTTAGGCTATGATCCGCGGTC
752	Chr	4075180	P	-	SL1344_3813A	N/A	4074834	4075025		No Data	putative membrane protein	Putative or unknown function	AAACTGGAAAATCTAGATAATTCGTTGATATATAATCTATAATTTGCCTTG
753	Chr	4080813	P	-	SL1344_3818	STM3851	4079045	4080382		yieG	putative membrane transport protein	Putative or unknown function	ACATGGGCGTCTTAATGCTCTCCAGCAGGGTATTTGCGCCCGCGATCGCTT
754	Chr	4080472	P	+	SL1344_3819	STM3852	4080551	4081216		yieH	putative hydrolase	Putative or unknown function	CCTATACCAAAATGCGACACCTGGCGCAGTTGTGTGGTAATTTTTTTCACT
755	Chr	4088397	P	+	SL1344_3827	STM3860	4088438	4090195		No Data	conserved hypothetical protein	Putative or unknown function	GAATCCTCATAGAAGTTGCGATAGAGAAAATCATCGGCTAAAAAGGGGATA
756	Chr	4106495	P	-	SL1344_3843	STM3876	4106010	4106468		asnC	regulatory protein	Regulators	AAAGCTAACTTCGGTTTTGATTCGTTAAAAATAATGGCTAAAATAGAGATA
757	Chr	4110772	P	-	SL1344_3846	STM3879	4109061	4110557	SL1344_3846-3845	yieN	conserved hypothetical protein	Putative or unknown function	GTCAGTGCCAGGGGATTCACTCCTTTGCCGCCTTGATGTAGTTTGAATGAA
758	Chr	4110680	S	+	SL1344_3847	STM3880	4110905	4112773		kup	membrane transport protein	Anions/cations and iron carrying compounds	ATCGTCTGACGCGCTGTTTATTTTTCTTTGAGCCAGGTTAATCTGGCTTCA
759	Chr	4115783	P, I	+	SL1344_3851	STM3884	4115898	4116788		rbsB	D-ribose-binding periplasmic protein	Transport and binding proteins	GTTGGGACATTGATCGGCGCATTGATTCTCGGCTTCCTTAATAATGGTTTG
760	Chr	4116795	S	+	SL1344_3852	STM3885	4116922	4117851	SL1344_3852-3853	rbsK	ribokinase	Central intermediary metabolism	AGGCCAAATATCCGGTTGACCTGAAACTGGTCATCAAGCAGTAATAAACGA
761	Chr	4120984	P	-	SL1344_3857	STM3888	4120254	4120958	SL1344_3857-3854	yieP	hypothetical 20.8 kDa protein in rbsr-rrsc intergenic region	Putative or unknown function	TTGCCGTTATTGCAACTGCAATCACACTTCCAGGTGGCATACTAATAACCA
762	Chr	4127951	P	-	SL1344_3858	STM3897	4127090	4127926		yifA	possible LysR-family transcriptional regulatory protein	Regulators	AGTATTAGTTACGCTTGACAGAGTGTAAAACAAAACATTTAAATCATAACG
763	Chr	4132348	P	+	SL1344_3863	STM3903	4132442	4133371	SL1344_3863-3865	ilvE	branched-chain amino-acid aminotransferase	Amino acid/polyamine metabolism	TATTGAATTGACCGTTGCCAGTCCCCGGTCGGTCGACTTACTGTTTAGTCA
764	Chr	4140972	S	+	SL1344_3871	STM3911	4141098	4141208	SL1344_3871-3872	No Data	putative membrane transport protein (fragment)	Putative or unknown function	CGGGACGGCGGTCCTGTCCTTTCTGACAAGGGGCGAGATACCATGAACATA
765	Chr	4146237	P	-	SL1344_3874	STM3914	4144972	4146237	SL1344_3874-3873	rhlB	putative ATP-dependent RNA helicase	Putative or unknown function	CACCGGATACGCTTTCGTAAAGCAATAGTAAGCTGATATTCTACCACACTA
766	Chr	4146332	S	-	SL1344_3874	STM3914	4144972	4146237	SL1344_3874-3873	rhlB	putative ATP-dependent RNA helicase	Putative or unknown function	ATATATAACTCCACAGGAATAAGCCTGGCGTGTTGGTGTAGCATTAACCAA
767	Chr	4167766	P	+	SL1344_3894	STM3939	4167912	4170458	SL1344_3894-3897	cyaA	adenylate cyclase	Regulators	TGTAGCGCATCTTTCTTTACGGTCAATGAGCAAGGTGTTAAATTGATCACG
768	Chr	4167719	S	+	SL1344_3894	STM3939	4167912	4170458	SL1344_3894-3897	cyaA	adenylate cyclase	Regulators	AGCCCGTATTTAAGAATTTACACGCAGCGAACGGTGCTACACTTGTATGTA
769	Chr	4176956	P	+	SL1344_3905	STM3951	4177086	4179248		uvrD	DNA helicase II	DNA/RNA replication, recombination, and repair	CATATCGAAATTTCGCGGTTGGCATCTCTCACCTCGCTGATATAATCACCA
770	Chr	4181589	P	-	SL1344_3908	STM3954	4181115	4181573	SL1344_3908-3907	yigG	conserved hypothetical protein	Putative or unknown function	TGGATGCGATTTATACGCAGCGTAAAAAATAACGCGACTATTATTCTAAAT
771	Chr	4182516	P	-	SL1344_3909	STM3955	4181608	4182492		rarD	chloramphenicol-sensitive protein RarD	Putative or unknown function	CAGCGCCACCGCTACTTATATGGTGGGATAAAAGCAGGTAAACTGTTGTTA
772	Chr	4184092	P, Alt	+	SL1344_3912	STM3958	4184139	4185950		recQ	ATP-dependent DNA helicase	DNA/RNA replication, recombination, and repair	ATTGTGTTTTAAACATTGCAGTTTCTCTCGCAGGCGCTGAAAATAGCGCCT
773	Chr	4185983	P	+	SL1344_3913	STM3959	4186014	4186634		rhtC	threonine efflux protein	Amino acid/polyamine metabolism	GGTGATGACGAAGAGTAGTCAGCCCGGCAAAAAAGTGCCAGGATGGTGACT
774	Chr	4189294	P	+	SL1344_3917	STM3963	4189318	4190217		yigM	putative membrane protein	Putative or unknown function	TGTTTGTTAGTTGACCAGTTGTCAACTTCACTCTCCGCTACAATGGGTGTT
775	Chr	4191097	P	-	SL1344_3918	STM3964	4190105	4191058		metR	trans-activator of metE and metH	Amino acid/polyamine metabolism	TTAGACGTCTGGATGTTTACACATCCATAATGTAAAGGTACTGTATATTCC
776	Chr	4191128	P	+	SL1344_3919	STM3965	4191307	4193571		metE	5-methyltetrahydropteroyltriglutamate-- homocysteine S-methyltransferase	Amino acid/polyamine metabolism	ATGAACAAATTGCGCTTGAGGAATATACAGTACCTTTACATTATGGATGTG
777	Chr	4193449	P, I	+	SL1344_3920	STM3966	4193915	4195258		No Data	putative regulatory protein	Putative or unknown function	TGCCGAGCGTCGAGTGGATTGAAGCCCTGCTGAAGAAGGCGGCACAACGTA
778	Chr	4197284	P	+	SL1344_3923	STM3969	4197310	4198740		yigN	putative membrane protein	Putative or unknown function	AAATCCCTTTTAAACTGGACGTTTATACAGCACAATTCTATTTTGTGCAGG
779	Chr	4202313	I	+	SL1344_3928	STM3974	4202307	4202855	SL1344_3928-3929	tatB	sec-independent protein translocase protein	Transport and binding proteins	AAAAGGAAGACGCTAAAAGCCAAGATAAAGAGCAGGTATAATCCGTGTTTG
780	Chr	4204536	P	+	SL1344_3932	STM3978	4205143	4206621		yigC	conserved hypothetical protein	Putative or unknown function	CGGTGTTTTTTACGCTCTGCTTCACTTCTTTATTGAGTAAATTAAGCAGTA
781	Chr	4206621	P	+	SL1344_3933	STM3979	4206707	4207408		ubiB	flavin reductase	Electron transport/energy metabolism	GTTACCGCGCGTATTGATGCGATTTGGGATGAGCTGGCTATCTTTAAATAA
782	Chr	4207291	P	+	SL1344_3934	STM3980	4207662	4209485		No Data	possible transferase	Putative or unknown function	ACAGGAACGGTACTTACGGCGGTATTGCAGGATTATGGTACGCTGGCGGGG
783	Chr	4224421	S	-	SL1344_3942	STM3994	4223634	4224218	SL1344_3942-3941	mobA	molybdopterin-guanine dinucleotide biosynthesis protein MobA	Vitamins and Cofactors	CTTTGGCGGAATCGCGCATTTTCAGATGGTAGATCAGGATATCATCAGTTA
784	Chr	4224361	P	-	SL1344_3942	STM3994	4223634	4224218	SL1344_3942-3941	mobA	molybdopterin-guanine dinucleotide biosynthesis protein MobA	Vitamins and Cofactors	GTTTGCCGTCAAAACCTGACTCTTTCGCCAGTTTCTGCAAAAATTGCGTCA
785	Chr	4227190	S	+	SL1344_3947	STM3999	4227569	4230355		polA	DNA polymerase I	DNA/RNA replication, recombination, and repair	GATACTCAATGGGAGCGTGATAGCCGCGAGTATTCTCGTCATAATAAATTA
786	Chr	4232507	P	+	SL1344_3951	STM4004	4232609	4233982		hemN	coproporphyrinogen III oxidase	Anions/cations and iron carrying compounds	ACCCTTCCGGTTATATGTTATCTGGTGTGGTTATTCGTTAAACTACAGCGA
787	Chr	4234202	P	-	SL1344_3951A	N/A	4234075	4234182		No Data	conserved hypothetical protein	Putative or unknown function	GCTGCTATTTTGCGCTTTACTGTTCCGATGAGTTCAGTATGATCATGCCCG
788	Chr	4236795	P	-	SL1344_3953	STM4006	4235713	4236762	SL1344_3953-3952	glnL	Two-component system sensory histidine kinase	Regulators	CAACAATCTGATCTCACGCGCTTTTTAGTGGTAAAAAGCTATAATGCACTA
789	Chr	4238635	P	-	SL1344_3954	STM4007	4237037	4238446		glnA	glutamine synthetase	Regulators	TGGCTTGCGTTCTGTTGCACCAATGTGGTGCTTAATGTTCACATTAAAGCA
790	Chr	4238795	S	+	SL1344_3955	STM4009	4238822	4240645		typA	GTP-binding protein	Translation/protein modification	GATGTTTGTGATCCTGTTTTGTAGTGCGATTAATCCGTGTACAATAACGCG
791	Chr	4249960	I	-	SL1344_3964	STM4018	4248675	4250057	SL1344_3964-3961	yihP	putative membrane permease	Putative or unknown function	AGAAAAACTTGCCTATGGACTGGGGGATTTAGGTTCTAATATCCTGTTAGA
792	Chr	4259601	P	+	SL1344_3974	STM4028	4259649	4260086	SL1344_3974-3975	yihZ	conserved hypothetical protein	Putative or unknown function	ACCTGGTGTATAGTCTTGCTTGGCGCAGAAATAACTGTCACTCTCGGGGAA
793	Chr	4262881	P	-	SL1344_3978	STM4032	4261927	4262856		No Data	putative lipase	Putative or unknown function	CCCTCGTTTCACCACTTTCCATCCCCAACGAACCAGGTTATAAACTGTACA
794	Chr	4269363	P	+	SL1344_3986	STM4038	4269441	4270277		fdhD	FdhD protein	Electron transport/energy metabolism	TGGTTGTTATTTTTCTTTGCGGACGGGCCCGCAAAGGTTCAGAATTGGATA
795	Chr	4271573	I	-	SL1344_3987	STM4039	4270545	4271576		No Data	putative lipoprotein	Putative or unknown function	TAAAATGAATCTGTAAATTTCAATGATATTATTTATAGGTTATTCTAATGA
796	Chr	4274223	P	-	SL1344_3990	STM4042	4273537	4274196	SL1344_3990-3988	No Data	putative exported protein	Putative or unknown function	CGAACGAAATGTTCGTCTTGTAAAGCAAATCTGTTCCGTTCATTATAATGA
797	Chr	4283739	P	-	SL1344_3999	STM4050	4282337	4283371		rhaT	L rhamnose-proton symporter	Transport and binding proteins	TATATTTATATTTAATTGATTCCTAACGTTAATTTCAATATATTTAAATTG
798	Chr	4289041	P, I	+	SL1344_4006	STM4057	4289368	4289763		No Data	inner membrane protein	Putative or unknown function	GTGTTGATCCAGGTCACTCAGCCGCGCTCTCCATGCTTTAAACTTAATTTC
799	Chr	4292173	P	-	SL1344_4008	STM4059	4291184	4291882	SL1344_4008-4007	cpxR	two-component response regulatory protein	Regulators	TGCATAAGATCTCGCATCTGCTGACGCTGATGTTCGGTTAAACTTATGCCG
800	Chr	4292661	P	+	SL1344_4010	STM4061	4292681	4293583		yiiP	putative transmembrane efflux protein	Putative or unknown function	GTCATTCTGTTATTAGCTTACTGTTTTAAACCATCCGTTATACTACCGGCA
801	Chr	4301257	P	+	SL1344_4018	STM4069	4301279	4301443		No Data	conserved hypothetical protein	Putative or unknown function	CCCACCATATCTGGCGTTTACCTGCCTGACTGTCCGTCGTATTCTTGCTGA
802	Chr	4312610	S	-	SL1344_4030	STM4081	4311703	4312470		tpiA	triosephosphate isomerase	Central intermediary metabolism	AACGGCGAAAAGGGGCTGACCTTCGCGGTTGAACCGATTAAGCTGACGTTA
803	Chr	4313256	P	+	SL1344_4032	STM4083	4313280	4313708		yiiR	putative membrane protein	Putative or unknown function	CACGATTAAAACGATAACTGTCGGGCTTGTCAAAAGGGTAAACTGTAGCGG
804	Chr	4318368	S	-	SL1344_4036	STM4087	4317309	4318154	SL1344_4036-4035	glpF	glycerol uptake facilitator protein	Transport and binding proteins	ATCTCCTGGTAACATTCATTCAATAACTTAAAAGTGTTAACATATTGGTTA
805	Chr	4318496	P	+	SL1344_4037	STM4088	4318553	4318792		yiiU	conserved hypothetical protein	Putative or unknown function	TACGCGGTATGTCGCTGGACAGCGAGAGCGGGGCTTCATACAATCGACACT
806	Chr	4318181	S	+	SL1344_4037	STM4088	4318553	4318792		yiiU	conserved hypothetical protein	Putative or unknown function	TTTTAAGGTTGATGTTTGACTCATAATCGGATCCTGAAGAGTATGTAATGA
807	Chr	4320579	P	-	SL1344_4039	STM4090	4319592	4320521		menA	1,4-dihydroxy-2-naphthoate octaprenyltransferase	Electron transport/energy metabolism	GCGCTGGTCGCAGATGAAGATCTAAGCCGTTTTATCTTATAATCGCGTCCA
808	Chr	4323554	P	-	SL1344_4042	STM4093	4322551	4323525		ftsN	cell division protein	Cell division	AGACTCACCTGTCTGGTCAAAGGCCCGCCGCTTCAGTAACATGACGGGCTG
809	Chr	4324698	P	-	SL1344_4043	STM4094	4323619	4324644		cytR	transcriptional repressor	Regulators	ATGAAAATTCTGTAACCGCTTCCACGCACTATCTGATAAAAATGTTTTCGA
810	Chr	4327021	P	-	SL1344_4044	STM4095	4324799	4326997		priA	primosomal protein replication factor	DNA/RNA replication, recombination, and repair	GTATGCAAACTGATCCGCGCTCCCTTATCGTAATGTGTATACTACCCGACG
811	Chr	4327251	S	-	SL1344_4044	STM4095	4324799	4326997		priA	primosomal protein replication factor	DNA/RNA replication, recombination, and repair	AGGTTCAGGTCGTGACCCACGGTAGAGTGGGTTTTGATAACATTACCGCAA
812	Chr	4330946	S	-	SL1344_4048	STM4099	4330569	4330886		metJ	repressor of the methionine regulon	Regulators	CGACCGCTAACTTCGTGTCAGGGCCGCGCCACTACGGTAAACTACGCGCGA
813	Chr	4331117	P	+	SL1344_4049	STM4100	4331151	4332311		metB	cystathionine gamma-synthase	Amino acid/polyamine metabolism	AGATGTCCAGATGTATTGACGTCTATTGTGGTAGTGGTTAATCTGTGGCCT
814	Chr	4340994	P	+	SL1344_4056	STM4106	4341021	4343201		katG	catalase (hydroperoxidase I)	Stress responses	TCTGTGGATTAATTCAACTATATCTATTTGCTCCTGGTGTATATCGTAACG
815	Chr	4345307	P	-	SL1344_4058	STM4108	4344141	4345244	SL1344_4058-4057	gldA	glycerol dehydrogenase	Central intermediary metabolism	TTAGATGTAGCGCAACAAATGCTCAATACGCCTGCGGTAGAGTCGGCAATA
816	Chr	4348695	P	+	SL1344_4061	STM4112	4348739	4349818	SL1344_4061-4062	frwC	PTS system, protein component IIC (phosphotransferase enzyme ii, c component)	Transport and binding proteins	GCCTTTTTATCCACTGTCTGCGCGGCAATGGATTGCCTATTGTTTTCCGCA
817	Chr	4359494	P	-	SL1344_4069	STM4119	4356691	4359342		ppc	phosphoenolpyruvate carboxylase	Electron transport/energy metabolism	CGATTTCGCAGTAATTGACGCCACGGGTTTTACGTGGCTTTATAAAAGACG
818	Chr	4364442	S	+	SL1344_4074	STM4125	4364518	4365435		oxyR	hydrogen peroxide-inducible regulon activator	Regulators	TTCAAGGGTTAAACGAGAAACCGCTCCGTTCTGTGATGTATTATTAATCAG
819	Chr	4369199	P	-	SL1344_4078	STM4129	4368074	4369174		trmA	tRNA (uracil-5)-methyltransferase	Translation/protein modification	AGAAATCATCAATAGCTGGACATCCACTGAGCAATCCCTACAATCCCCGCG
820	Chr	4381074	S	-	SL1344_4083	STM4139	4380025	4380975		coaA	pantothenate kinase	Vitamins and Cofactors	GCGAGATTTTTTCTTATTATTCCTCCCCATCTGGTGTTACCCTCCTGCCCA
821	Chr	4396640	P	+	SL1344_4096	STM4157	4396681	4397691		No Data	conserved hypothetical protein	Putative or unknown function	TTAGCTGACAGCGATTGCAACGCTAAAAAACATGTGCTAATAATCATCATG
822	Chr	4404621	S	-	SL1344_4104	STM4165	4404081	4404569		rsd	putative regulatory protein	Putative or unknown function	TACGATCCATAGCTATTGCACTACCTTTGCTTCACTGGCATGTTGTTAACA
823	Chr	4409731	P	+	SL1344_4112	STM4173	4409767	4411164	SL1344_4112-4113	hydH	two-component system sensor protein	Regulators	GTGTGCGACAACGCGCGGTTATGCGGAGCGAAGAATGGCATGATCTCTGCT
824	Chr	4415477	P	-	SL1344_4115	STM4176	4413793	4415382	SL1344_4115-4114	purH	phosphoribosylaminoimidazolecarboxamide formyltransferase and IMP cyclohydrolase (bifunctional enzyme)	Purine/pyrimidine metabolism	AAAAGAAAAATTCGCGAGCGTTGCGCAAACGTTTTCGTTACAATGTCGCCG
825	Chr	4415702	S	-	SL1344_4115	STM4176	4413793	4415382	SL1344_4115-4114	purH	phosphoribosylaminoimidazolecarboxamide formyltransferase and IMP cyclohydrolase (bifunctional enzyme)	Purine/pyrimidine metabolism	TGTGAAGTGATTCACATCCGCCGTGTCGATGGAGGCGCATTATAGGGAGTT
826	Chr	4426269	P	+	SL1344_4120	STM4185	4426367	4428118		aceK	isocitrate dehydrogenase kinase/phosphatase	Central intermediary metabolism	CATCCGTTACCGCGTTAACGGGTTCCACCGAAGAAGCGCAGTTTTGATTGA
827	Chr	4433309	S	+	SL1344_4124	STM4189	4433653	4435209		yjbB	putative membrane protein	Putative or unknown function	TTGAGGATGTTGAGCGGTGGCTCGCGCCGAACCTGGGTTACGATGCGGACT
828	Chr	4436006	P	-	SL1344_4125	STM4190	4435285	4435974		pepE	peptidase E (pseudogene)	Protein folding, degradation and stabilization	TCATGAGCCATATCAGTAAGACATTAAATGGATAATGGTAGCATTATTACG
829	Chr	4436153	P	+	SL1344_4127	STM4192	4436182	4436721	SL1344_4128-4127	No Data	conserved hypothetical protein	Putative or unknown function	GGCCAGATCTGCCATCTGGTATCGCCTGAAAAATTACAGGTATAATCCGCA
830	Chr	4440562	P	-	SL1344_4132	STM4197	4440132	4440422	SL1344_4132-4131	No Data	hypothetical protein	Putative or unknown function	TGTTAGCATTAAATGTTCAGTTTGCATAGCAAATGAAGTATTATAAAAAAC
831	Chr	4448593	P	-	SL1344_4141	STM4206	4448208	4448570	SL1344_4141-4133	gtrA	putative phage glycosyl transferase	Putative or unknown function	TCTGCTGTTCAGGAATGATCCTCTCAGTTTTGTCTGGTAGACTTCGCTGAA
832	Chr	4459135	P	-	SL1344_4154	STM4218	4458416	4458703	SL1344_4154-4142	No Data	hypothetical bacteriophage membrane protein	Putative or unknown function	AAATATATATAAATATTTACTATCAACGCATTTAATTATAAATTAAAAAAA
833	Chr	4459159	P	+	SL1344_4155	STM4219	4459279	4459626		No Data	putative regulatory protein	Putative or unknown function	ATTATAAATTGAAAACGATATATATATTTTTTTAATTTATAATTAAATGCG
834	Chr	4461420	P	+	SL1344_4157	STM4221	4461453	4463102		pgi	glucose-6-phosphate isomerase	Central intermediary metabolism	CGGCACTAAAACAATCACACTTTTCTGTGACTGGCGTTACAATCGATCCCA
835	Chr	4471852	P	-	SL1344_4166	STM4229	4470620	4471819		malE	periplasmic maltose-binding protein	Transport and binding proteins	TAGGGGCGGGGAGGATGGAAAGAGGTTGTCGTATAAAGAAACTAGAGACCG
836	Chr	4472124	P	+	SL1344_4167	STM4230	4472172	4473281	SL1344_4167-4169	malK	maltose/maltodextrin transport ATP-binding protein	Transport and binding proteins	GCCGGGGGGTGGAGGATTTACCCCAGTCAGGGATCGCGCATAGTCAGGCCA
837	Chr	4480034	S	+	SL1344_4173	STM4236	4480063	4480431		dgkA	diacylglycerol kinase	Fatty acid/lipid metabolism	CGCTGCGTTACGGCAGTCCGAATCGTGCAGGGCAACCGTATAATGTCATTG
838	Chr	4486429	P	+	SL1344_4180	STM4244	4486463	4486660		pspG	Phage shock protein G	Transposon functions/phage	CCGTGCCGCCGGGCAATGCCATTTTTATGGGGAGCGACTATGCTGGAACTA
839	Chr	4497291	P	+	SL1344_4191	STM4255	4497295	4497411		No Data	conserved hypothetical protein (SPI4)	Pathogenesis	GGTCACGACAATCAGTTTGTCGCGGGGGATGACGAGGTTAATATTTTTGAG
840	Chr	4498679	P	+	SL1344_4193	STM4257	4499149	4499781	SL1344_4193-4198	siiA	type I secretion-related protein (SPI4)	Pathogenesis	CAATGATTTAAGTTATATTGAAGTCCATATGACCCTATGTTTTAATTGTGA
841	Chr	4523497	P	+	SL1344_4200	STM4264	4523673	4525274		yjcC	putative exported protein (SPI4)	Pathogenesis	AAGATGTATACCCCATCGTTTACTTGAGTATAAATCTGATATTATCAAAAA
842	Chr	4525626	P	-	SL1344_4201	STM4265	4525262	4525585		soxS	regulatory protein SoxS	Stress responses	TCCATAAATCGCTTTACCTCAAGTTAACTTGAGGAATTATACTCGCCCGCA
843	Chr	4525649	P	+	SL1344_4202	STM4266	4525672	4526130		soxR	SoxR protein	Regulators	AAACAGTATTCGATTCGTCGTTTTGTCTGCGGGCGAGTATAATTCCTCAAG
844	Chr	4527278	P	+	SL1344_4204	STM4268	4527438	4528787		yjcD	putative xanthine/uracil permeases family protein	Putative or unknown function	AGCGGCAAAGTTCAGTTGAAAAAGCGTTGATGATCGCTGGATAATCGTTTG
845	Chr	4528878	P	+	SL1344_4205	STM4269	4528937	4530583		yjcE	putative sodium/hydrogen exchanger family protein	Putative or unknown function	GTTTTCATTTTCAGGACACATCACGTTACCTTTTGCGTTAATCTGAAGAAG
846	Chr	4531642	P	+	SL1344_4207	STM4271	4531669	4532079	SL1344_4207-4208	No Data	putative membrane protein	Putative or unknown function	ATGATTTTAATTCATTTCTGCCCGTGACGGAGGTTCTCTATACTGGCGCTC
847	Chr	4537301	P	+	SL1344_4213	STM4277	4537396	4538832	SL1344_4213-4218	nrfA	cytochrome c552, subunit of nitrite reductase complex	Electron transport/energy metabolism	AATTGATTAAAGACAACATTTTAAGTGTGGTTATTTGTTACACATAGAGGA
848	Chr	4552072	S	+	SL1344_4227	STM4290	4552262	4553764		proP	putative amino acid permease	Putative or unknown function	CATATATGTGTGAAGTTGATCACATATTTAAACCCTGTTAGGGTAAAAAGG
849	Chr	4558830	P	-	SL1344_4231	STM4294	4557453	4558790		yjdE	putative amino acid permease	Putative or unknown function	CCCGTCTCCGACATAATTCAGCGGCATTCTGAGGGGGTATGATACGACGTA
850	Chr	4559783	P	-	SL1344_4232	STM4295	4558930	4559691		adiY	AraC family transcriptional regulator, transcriptional activator of adiA	Regulators	ATTCATCGTACAAATATTGTAATATTATTCAGGAAAGTTATTTTAGTGCAG
851	Chr	4562321	P	-	SL1344_4233	STM4296	4559989	4562259		adi	arginine decarboxylase	Amino acid/polyamine metabolism	ATTATTCCATCACTTTACACCCCCTATTTGACGGGGTAATACTTGCCCACG
852	Chr	4563503	S	-	SL1344_4234	STM4297	4562489	4563421		melR	melibiose operon regulatory protein	Regulators	GGCGTAAAAAGCAGAGTATTCGGCCTGATAGTCAGGCTACGCTCTACAATA
853	Chr	4563667	P	+	SL1344_4235	STM4298	4563690	4565045	SL1344_4235-4236	melA	alpha-galactosidase	Electron transport/energy metabolism	CATCGGGGAAGACGGAGGTTTTCACCGGGAACGCGTGCCACCATGAAGGTG
854	Chr	4570229	P	-	SL1344_4239	STM4302	4569886	4570152		No Data	hypothetical protein	Putative or unknown function	AACAAAAGTTAATTAAGTATTATCCCATGCCGAGAGTGTGTATTTTTATTA
855	Chr	4571706	P, I	-	SL1344_4240	STM4303	4570469	4571188		dcuR	two-component response regulator	Regulators	AATTACATGTGATTCTGGGATTATTGCACCTGAAGAGTTATAAGCAGCTTG
856	Chr	4573111	P	+	SL1344_4242	STM4305	4573172	4575601	SL1344_4242-4245	No Data	anaerobic dimethyl sulfoxide reductase chain	Anaerobic metabolism	GACGTTCAGAATGCGTTTGATCACAATCAATCAGCGCTAATATTTAATCTA
857	Chr	4573125	S	+	SL1344_4242	STM4305	4573172	4575601	SL1344_4242-4245	No Data	anaerobic dimethyl sulfoxide reductase chain	Anaerobic metabolism	GTTTGATCACAATCAATCAGCGCTAATATTTAATCTATTATGATTAGTTTT
858	Chr	4579424	P	-	SL1344_4246	STM4309	4577760	4579160		No Data	putative exported protein	Putative or unknown function	TCGTAACGCATTTCTTAAAAATAAAGCCGATGTCCGATAGAATCGTTATTC
859	Chr	4579411	P	+	SL1344_4247	STM4310	4579464	4580369		No Data	putative membrane protein	Putative or unknown function	CGGGCTTTTTGTGATAACCCTCACTATTTCATTTTGCCTATGCTAATGGCG
860	Chr	4582497	P	-	SL1344_4251	STM4315	4581462	4582337	SL1344_4251-4248	rtsA	araC family regulatory protein	Regulators	CCATCTTTTTTTTATACGCGACATAGTTTTTTAACGATACTATAATATGTA
861	Chr	4582899	P	-	SL1344_4252	STM4316	4582602	4582823		No Data	conserved hypothetical protein	Putative or unknown function	AAAGATTCAATACTGCCGTGCCAAAACACGCAACATTATATAATCAGAAAG
862	Chr	4583114	P	+	SL1344_4253	STM4317	4583140	4583433	SL1344_4253-4254	No Data	conserved hypothetical protein	Putative or unknown function	CTAAATTTATCGTAATGACATCTGCGTTACGCGTGTTGTATGCTTAATATC
863	Chr	4591543	P	-	SL1344_4262	STM4325	4590110	4591294		dcuA	anaerobic C4-dicarboxylate transporter	Transport and binding proteins	TCTCCGTACAGAACTTGATGCACCCGGCTTATAAAGCTAAACGTTATACTG
864	Chr	4598848	P	-	SL1344_4269	STM4332	4597983	4598840		yjeJ	hypothetical protein	Putative or unknown function	ATATATCAAATACATTGCAGTAAAACATTTAATTATTTTATATTTGTGGAG
865	Chr	4598926	S	-	SL1344_4269	STM4332	4597983	4598840		yjeJ	hypothetical protein	Putative or unknown function	GTTTTAGGACTCGCTTAGCGTGTACTGCATTTTCGAATTATACTGGTTCTC
866	Chr	4600763	P	+	SL1344_4272	STM4335	4600776	4600952		ecnA	putative entericidin A precursor, toxin-antitoxin module	Putative or unknown function	AAAGTCGATACCCGTTCCGGCGAATACGTATCCCGCGTAAAATAATTTACG
867	Chr	4613148	P	-	SL1344_4284	STM4347	4609814	4613116		yjeP	putative membrane protein	Putative or unknown function	CGCCAGCCCGCTGGTTGACAATAAAAAAGACGACACCTAATCAAGAGAGAA
868	Chr	4614201	P	-	SL1344_4285	STM4348	4613159	4614127		psd	phosphatidylserine decarboxylase proenzyme	Fatty acid/lipid metabolism	ACGCGTAAAAACTTTTCTGATACGGACGACTGACAGATACGCTAGGCGTCG
869	Chr	4615323	P	+	SL1344_4287	STM4350	4615378	4615923		orn	oligoribonuclease	DNA/RNA interactions and degradation	CGTACTGGCTCCTGGTCGCCCATAGTGGGCAAAACATCTATGATACACGCA
870	Chr	4624269	S, I	+	SL1344_4295	STM4361	4625156	4625464	SL1344_4295-4298	hfq	host factor-I protein (HF-I)	Regulators	GTTTTGCCAGTAGAGTTGATAAGCGTTGATTCCGCCCTCATTTATCGGGGA
871	Chr	4642703	S	-	SL1344_4312	STM4379	4642267	4642569	SL1344_4312-4311	yjfO	biofilm stress and motility protein A	Cell surface/envelope	CACGGAGAAATACTTAACGCAAGTTTATGGATAGCGCAATAATTCATAATG
872	Chr	4642765	P	+	SL1344_4313	STM4380	4642780	4643529		yjfP	conserved hypothetical protein	Putative or unknown function	TTGCGCTATCCATAAACTTGCGTTAAGTATTTCTCCGTGGCATACCGGATA
873	Chr	4642711	S	+	SL1344_4313	STM4380	4642780	4643529		yjfP	conserved hypothetical protein	Putative or unknown function	TTTCGAATGAAAACGTTGCGAAAGCGTAACCCAGTTCTCAAACATTATGAA
874	Chr	4645762	P	+	SL1344_4316	STM4383	4645813	4647210	SL1344_4316-4321	sgaT	PTS system ascorbate-specific transporter subunit IIC	Transport and binding proteins	TAATCAAATTTAATCTTGTTGTGATTACTTTTGAAAATTAAAGTGAAGGGA
875	Chr	4652644	P	+	SL1344_4328	STM4395	4652681	4653607		yifZ	putative exported membrane protein	Putative or unknown function	TTAACCCCATCGCTTTTCGACTGGCTATCTCCCCCTCTTTTCGCGATAATC
876	Chr	4654481	P	+	SL1344_4330	STM4397	4654512	4655132		fklB	probable FkbP-type peptidyl-prolyl cis-trans isomerase	Protein folding, degradation and stabilization	TCCCTGAGACAAAGTTTTACCAGAAGAAGCGTGGCTGTTATGCTGCCCGCT
877	Chr	4659667	P	+	SL1344_4335	STM4402	4659696	4660082		ytfH	conserved hypothetical protein	Putative or unknown function	CCTCAGTGTTGGTCTTGTGTTTTATTACGCTACCACCTAAACTTACTTTTA
878	Chr	4662316	S	+	SL1344_4337	STM4404	4662351	4663091		cysQ	cysQ protein	Central intermediary metabolism	TGACGGTATCACAGTTGGCGGAACCCTTAACGATCGGGTATAAGTAAAACA
879	Chr	4663805	S	-	SL1344_4338	STM4405	4663081	4663638		ytfJ	putative exported protein	Putative or unknown function	AGTGTGCATAAGTATATTTACCTTTTGATTACAGTTATTCAGAATTATCTA
880	Chr	4665699	P	-	SL1344_4340	STM4407	4664256	4665599		ytfL	hemolysin-like protein	Pathogenesis	GAAAATGAACCCTCTGGCGACTTTACAGTAGCTTACGCTATACTAGCCCTG
881	Chr	4665495	I	-	SL1344_4340	STM4407	4664256	4665599		ytfL	hemolysin-like protein	Pathogenesis	TCCATCTCCGAGATCTCGCTTGCCGCATCACGTAAGATTAAACTTAAGTTA
882	Chr	4672067	S	+	SL1344_4344	STM4411	4672145	4672489		ytfP	conserved hypothetical protein	Putative or unknown function	GGTGTAGGGATATTTGACTCTCTGGCGACGCTCACGTTACGTTATCGCCTG
883	Chr	4677229	P	+	SL1344_4349	STM4416	4677252	4678631		mpl	UDP-N-acetylmuramate/L-alanyl-gamma-D-glutamyl-meso-diaminopimelate ligase	Murein and peptidoglycan metabolism	TACCTGAAATGCGTTTCTCACTTGCCAGACATGTGCGTAAAATGGCTCGCA
884	Chr	4681851	P	+	SL1344_4352	STM4419	4681898	4683334		No Data	putative sugar transport protein	Putative or unknown function	CGTGATCTTTTGCATGGAATTTTTCTTCTAATGAATGCAAAAATAAAATGA
885	Chr	4686365	P	+	SL1344_4355	STM4423	4686466	4687290	SL1344_4355-4359	No Data	putative DNA-binding protein	Putative or unknown function	ATTATGATCTATATAGCATTTTTGTTTCATTTGGTGTGGTATAAAAATTCA
886	Chr	4718839	P	-	SL1344_4385	treB	4717385	4718802	SL1344_4385-4384	treB	PTS system, trehalose-specific IIBC component (pseudogene)	Central intermediary metabolism	TCGGGAACGTTCCCATTTTTAAACCAACGTTGAAGAGCTACTCTTGCGCCA
887	Chr	4719988	P	-	SL1344_4386	STM4455	4718940	4719887		treR	trehalose operon repressor	Stress responses	TACGCATAAATCCATAAGTTTTGTGGCAATTATGGCGGTATCATACCGTTA
888	Chr	4726217	P	-	SL1344_4393	STM4463	4725715	4726203		No Data	putative transcriptional regulator	Putative or unknown function	GATGTGACAAATGTGATGAATTTCGCCAGTCCGTTGATATCAATAATAAAG
889	Chr	4731217	P	-	SL1344_4397	STM4467	4729908	4731128	SL1344_4397-4394	No Data	arginine deiminase	Amino acid/polyamine metabolism	TGTGAATCTCATCACATTAACAACCCAAATAAAATTCAATCATTGCTCCCG
890	Chr	4731770	P	+	SL1344_4398	STM4468	4731804	4732256		yjgK	conserved hypothetical protein	Putative or unknown function	AATCGATGAGAGTAAGGGTAGTATGGCAGCCATTTTTCTCGTATAAAGAGA
891	Chr	4736103	P	-	SL1344_4403	STM4473	4735569	4736072	SL1344_4403-4402	yjgM	putative acetyltransferase	Putative or unknown function	GATTCAGGATCTCCTTGCGCGTAACTCAAGACGGTGGTATTAAAGTAATCT
892	Chr	4740542	P, I	-	SL1344_4405	STM4475	4737596	4740451		valS	valyl-tRNA synthetase	Translation/protein modification	AAGCTTTGCAGATTTTGCCACCGCTTTCACAGAAGTGGTAGACTTCGTCCC
893	Chr	4762086	P, I	-	SL1344_4421	STM4492	4759355	4761817	SL1344_4421-4420	No Data	conserved hypothetical protein	Putative or unknown function	GCTCCCCAACGACGCAATTAACACAGTGCTTTCATGGTAAAATGTTTTTCG
894	Chr	4772471	P	-	SL1344_4427	STM4498	4771820	4772422	SL1344_4427-4422	No Data	putative inner membrane protein	Putative or unknown function	AAATTGCCTTTTCTCATGGCATCCCGCCCCTTCCCCCATTACAATCATCGT
895	Chr	4774027	P	-	SL1344_4429	STM4499	4773248	4773973		yeeN	conserved hypothetical protein	Putative or unknown function	TGTTTTTATTTCTCATAGACGAGAATTTATATATTATGATATAATACGGCA
896	Chr	4776762	P	+	SL1344_4432	STM4502	4776906	4777514		No Data	hypothetical protein	Putative or unknown function	ATTGATTAAACTCATATACCCGATAATGACCGCTTTGATAGTCTCGGCGTA
897	Chr	4777743	P	+	SL1344_4433	STM4503	4778024	4778761		No Data	putative inner membrane protein	Putative or unknown function	TTTGCGCAAGCCAGCAGAATGACAAAGGGCGATGGGTTACAATTATCTGTA
898	Chr	4778995	P	+	SL1344_4434	STM4504	4779037	4779948		No Data	hypothetical protein	Putative or unknown function	GTTGAACTGATATTAATACCTGAACCACTGAATTAGAGTAATGTGGCGCTA
899	Chr	4781275	I	-	SL1344_4436	STM4506	4780611	4781285		No Data	hypothetical protein	Putative or unknown function	GGCGAAAATCCAGCCGCTCTCTTTGTATCAAGAACGCGTTATGATAAAAGA
900	Chr	4783806	P, I	+	SL1344_4440	STM4509	4784224	4784670		No Data	conserved hypothetical protein	Putative or unknown function	ATTACTGTGATAACACTGCGCGCGATAAAAACATTAAATATATTCACATAG
901	Chr	4789723	P	-	SL1344_4445A	N/A	4789469	4789723		No Data	hypothetical protein	Putative or unknown function	TCAACACGTTATTTCAAGGTAAAGATGCCACTAAAAACTATACTTATTCTA
902	Chr	4791294	P, I	-	SL1344_4446	STM4515	4789863	4791047		yjiJ	putative membrane protein	Putative or unknown function	AACGGCACGCTGGTCGGCGGCGCTATCGGTCTGGTGTTATATTTACTGTCG
903	Chr	4796571	P	+	SL1344_4452	STM4521	4796616	4796780		yjiS	conserved hypothetical protein	Putative or unknown function	ATTTATCCACGTTGCACTAACCGTGCTTTTTATCCCGGTATTGTTTGTACA
904	Chr	4798038	P	-	SL1344_4454	STM4523	4797630	4797962	SL1344_4454-4453	SymE	Toxic peptide, stimulates RNA degradation. SymR RNA regulated toxin-antitoxin system	Stress responses	CAGTCTATTTTCAGCTGGACTTTTCTTTTATTTACTGATGTTATGTACAGG
905	Chr	4804938	P	+	SL1344_4458	STM4527	4805049	4805963		mrr	Mrr restriction system protein	DNA/RNA replication, recombination, and repair	TACCCTGTGCCGTAAAGGGAAAATAACAGACCCATGGTAGACTTCATATTG
906	Chr	4815492	P	+	SL1344_4466	STM4535	4815517	4815939	SL1344_4466-4471	No Data	PTS transport system, IIA component	Transport and binding proteins	TTTTTCGGCGCGCCACTTTTTCTGGCACGCCGCTTGCTCTCTTTTATCACA
907	Chr	4826544	S	+	SL1344_4478	STM4547	4826700	4827425		yjjQ	conserved hypothetical regulatory protein	Putative or unknown function	ATTGTCTTGCTTCTGGTTTTATGAGTAACTATGCGATAGTGATTTCATGTT
908	Chr	4826344	P	+	SL1344_4478	STM4547	4826700	4827425		yjjQ	conserved hypothetical regulatory protein	Putative or unknown function	TGGCGTGAGTAGCGGGCGTAAAATTAGGCATGACTTAGTATAATTCGCAGA
909	Chr	4828618	P	-	SL1344_4480	STM4549	4828111	4828569		No Data	conserved hypothetical protein	Putative or unknown function	TCACATTATTATATTTACAGCGGCGCTCTCCGTATGCCAAATTACGTTTTG
910	Chr	4832772	P	-	SL1344_4484	STM4556	4831721	4832749		rsmC	conserved hypothetical protein	Putative or unknown function	AATATAGCAAATCTGTCGAATCTGCGCCATCAAACTACTATAATCGCCGCC
911	Chr	4834414	P	+	SL1344_4488	STM4560	4834471	4836060		prfC	peptide chain release factor 3	Translation/protein modification	CCTGTGTAAACACTGATTGCCTCCCCCAGGTTGATGGGTAAAATAGCCGCA
912	Chr	4837462	P	+	SL1344_4490	STM4563	4837493	4838566	SL1344_4490-4491	yjjU	conserved hypothetical protein	Putative or unknown function	GACTGGCTTTTACGGTTTTAGCCGTTAACGTTTTGCGTTACCTTGTCAGCC
913	Chr	4840701	P, I	-	SL1344_4492	STM4565	4839369	4840232		yjjW	pyruvate formate lyase-activating enzyme	Translation/protein modification	TGACCGCCCGTTACGGCAAGAATGATACGGCGAACGAGCTGGGCTACCGTA
914	Chr	4841964	P	+	SL1344_4494	STM4567	4841993	4842790		deoC	deoxyribose-phosphate aldolase	Purine/pyrimidine metabolism	ACTGTGATGTATATCGAAGTGTAATCGCGAGTGAATGTTAGAATATTAACA
915	Chr	4850940	I	-	SL1344_4501	STM4574	4850254	4850943		No Data	putative outer membrane protein	Putative or unknown function	CTCCAGCATTCACATGGAATATTCAACACCTCTTTAATGGAACTATAATGA
916	Chr	4851872	P	-	SL1344_4502	STM4575	4850991	4851680		No Data	putative outer membrane protein	Putative or unknown function	GTGAATAGCACAAATAGTTAAAACACACTCACTAACTACTATATTCTTTAA
917	Chr	4851946	S	-	SL1344_4502	STM4575	4850991	4851680		No Data	putative outer membrane protein	Putative or unknown function	CTAAATGAATAATATCAGAGAGACGAATGTGTCTCTGATATTATTTAAACA
918	Chr	4856247	P	+	SL1344_4507	STM4580	4856362	4857621		nadR	conserved hypothetical transcriptional regulator	Regulators	AAAAAGCTCGCAGATGCGTTAAGCGTGTTTGACGACTTATAATTCTCTGTA
919	Chr	4861548	P	+	SL1344_4510	STM4583	4861610	4861936		trpR	probable trp operon repressor	Amino acid/polyamine metabolism	TATGGGGCAGAAAGAGGCCTTAATGAGCGACTCTGAGTGGCAGCGACGGTA
920	Chr	4862577	P	-	SL1344_4511	STM4584	4862038	4862553		yjjX	conserved hypothetical protein	Putative or unknown function	TGGCGAACAAGGTATACCTGTAACATGTTTTTTTTCCGTTATACTGCGATA
921	Chr	4862563	P	+	SL1344_4512	STM4585	4862602	4863249		gpmB	probable phosphoglycerate mutase 2	Central intermediary metabolism	ATTTTGGCAGGATTGGTGGTCGCAGAGATAACCTGGTGCATAATTAAGCTC
922	Chr	4864253	S	-	SL1344_4513	STM4586	4863246	4864115		rob	right origin-binding protein	Regulators	CGTTGCGTAATTATTAGACATTCTAAAATAAAATGGTTATAGATCACAGGA
923	Chr	4876878	S	-	SL1344_4525	STM4598	4875950	4876666		arcA	global response regulator	Anaerobic metabolism	TTAGGTGTCCGGTACGTCTTAGCCTGTTATGTTGCTGTTAAAATGGTTAGG
924	Chr	4877082	S	-	SL1344_4525	STM4598	4875950	4876666		arcA	global response regulator	Anaerobic metabolism	CATCGTTATCCTACTGTTTATTTAGGATAATTTAATTTAAAATAGATCCTG
925	SLP1	616	P	-	SLP1_0001	-	21	584		-	-		GGCTGCCCTGGGCGTTCTGGCGATGTGACGGGTGTGGTATCTTTGGCGGTA
926	SLP1	33361	P, I	+	SLP1_0036	-	33259	33729		-	-		ATGCCGCTGACTGTTTTGATCTGGCCGGGAGAGACTATAAAATAGATCCGG
927	SLP1	46037	P	+	SLP1_0052	-	46066	46488		-	-		ACAGTAAAATTTCACTTGCAGGACAGAAAATATCTTAAATAATGCTGTATA
928	SLP1	50045	P	-	SLP1_0055	-	48818	50023		-	-		AAATATTATGATTTATTTCTTGCAACATGATTCTTTTTGTTCAAAATGACA
929	SLP1	54404	P	+	SLP1_0060	-	54429	54917		-	-		TGCACGCCACTCTCCTTGCCAGGTACTGGTGTTAATGCTAATGTACGCATA
930	SLP1	60945	P	-	SLP1_0065	-	59874	60869		No Data	No Data	Putative or unknown function	AGTAGATCACTGAAAGGGAACTCAGCCCGGATTGTGCGATCTGATCAATCG
931	SLP1	68060	P	-	SLP1_0071	-	67693	67956		-	-		ATCACCACGAATCACTGGAAGGCTTTCTTCGTAAACGGCATAGTGTAAGTA
932	SLP1	68145	S	-	SLP1_0071	-	67693	67956		-	-		ATACTTTCGTGGCTCTTAACATATTCAGCGCTCATTAATATATTGTATTTA
933	SLP1	76024	S	+	SLP1_0084	-	76217	77206		-	-		TGTTAATCATAAGCTGTAACTGGTAAACAATAAGCTGTATTATGCAAAGGA
934	SLP1	93835	P	-	SLP1_0104	-	93464	93748		-	-		CGGTGCTGGCGCAGACGGTCTGAACCGGAGAAGCCCAGTATAATGAGTGAA
935	SLP2	2370	P	+	SLP2_0003	-	2395	2664	SLP2_0003-0004	-	-		TGGCGCGGCATATCCTGGTGACGATATCTGAATCGTTATATACTGTGTATA
936	SLP2	6340	P	-	SLP2_0010	-	5713	6315	SLP2_0010-0008	-	-		ATCACCTGATGGGAAATTTACTAATTTATGAATTGTGATATTATTAAAGAG
937	SLP2	8227	P	+	SLP2_0012	-	8294	10174		-	-		CACTATCATTAAATCTTGACATGCCATTTTCTCCTTAATAAATTAATACTG
938	SLP2	10591	P	+	SLP2_0014	-	10658	10977		-	-		TGTTTTCTCCTTTATTGTTATCGTGTACCGGTGCGTGATAACATAATCACA
939	SLP2	11958	P	+	SLP2_0016	-	12400	12852		-	-		AATCACATCCTGCATGATTTGTGTGTTATTGATTTATGATAATATCAGGTA
940	SLP2	12241	S	+	SLP2_0016	-	12400	12852		-	-		GGCGGAAAACAGCGATATGATGATTTTCTCAGCGTGGTACACTTCCGGAAA
941	SLP2	14798	P	+	SLP2_0020	-	14855	15226	SLP2_0019-0020	-	-		AAAGCGATGAATTCAGGACTCGCTGTGACAGAAACACGTTATAAAGGTTTA
942	SLP2	15338	P	+	SLP2_0021	-	15468	16439	SLP2_0021-0022	-	-		TATGCTAGATAAATGCTAGATTGCTGCAAGATAAATGATATAATGCTCAAA
943	SLP2	17136	P	-	SLP2_0023	-	16979	17101		-	-		TCAGAACAATGACATTTGACTGTGTGCGGATTCAGTTATTAGAATACTGTA
944	SLP2	41766	S	+	SLP2_0053	-	41782	42066		-	-		CCGTGTGATAAAAGGATTGTTGCAGATACGAAAGTCGTTAGAATAGCTGCG
945	SLP2	65965	P	-	SLP2_0076	-	65154	65612	SLP2_0076-0056	-	-		GAGGCATAGAGGATATTTGAATTTACATAAATTCTGATATACTCAGTAAGA
946	SLP2	70587	P	+	SLP2_0083	-	70650	71006		-	-		ACAGTTTAAACCTCCCTAAGACCTGTGTGTTTTTGGGATATAACGTAAATG
947	SLP3	5641	P	+	SLP3_0011	-	5666	5947		-	-		AAGTAGGGTCGGGATTGCCGCCGCTGTGCCTCCATGATAGCCTACGAGACA
